# Supplementary material for: Protocol for data extraction: how real-world data have been used in the National Institute for Health and Care Excellence appraisals of cancer therapy
Source: PubMed Central journal article supplement — BMJ Open. 2022 Jan 6;12(1):e055985. doi: 10.1136/bmjopen-2021-055985 (PMC8739419; doi:10.1136/bmjopen-2021-055985), 2022-01-06
Supplement: bmjopen-2021-055985.draft_revisions.pdf [file bmjopen-2021-055985.draft_revisions.pdf]

# BMJ Open

BMJ Open is committed to open peer review. As part of this commitment we make the peer review history of every article we publish publicly available.

When an article is published we post the peer reviewers' comments and the authors' responses online. We also post the versions of the paper that were used during peer review. These are the versions that the peer review comments apply to.

The versions of the paper that follow are the versions that were submitted during the peer review process. They are not the versions of record or the final published versions. They should not be cited or distributed as the published version of this manuscript.

BMJ Open is an open access journal and the full, final, typeset and author-corrected version of record of the manuscript is available on our site with no access controls, subscription charges or pay-per-view fees (<http://bmjopen.bmj.com>).

If you have any questions on BMJ Open's open peer review process please email [info.bmjopen@bmj.com](mailto:info.bmjopen@bmj.com)

# BMJ Open

## Understanding the use of real-world data in appraisals of cancer therapy: a protocol for data extraction

|                               |                                                                                                                                                                                                                                                                         |
|-------------------------------|-------------------------------------------------------------------------------------------------------------------------------------------------------------------------------------------------------------------------------------------------------------------------|
| Journal:                      | <i>BMJ Open</i>                                                                                                                                                                                                                                                         |
| Manuscript ID                 | bmjopen-2021-055985                                                                                                                                                                                                                                                     |
| Article Type:                 | Protocol                                                                                                                                                                                                                                                                |
| Date Submitted by the Author: | 02-Aug-2021                                                                                                                                                                                                                                                             |
| Complete List of Authors:     | Kang, Jiyeon; London School of Hygiene and Tropical Medicine Faculty of Public Health and Policy, Department of Health Services Research and Policy;<br>Cairns, John; London School of Hygiene and Tropical Medicine, Department of Health Services Research and Policy |
| Keywords:                     | ONCOLOGY, Health economics < HEALTH SERVICES ADMINISTRATION & MANAGEMENT, Organisation of health services < HEALTH SERVICES ADMINISTRATION & MANAGEMENT                                                                                                                 |
|                               |                                                                                                                                                                                                                                                                         |

SCHOLARONE™  
Manuscripts

1  
2  
3  
4 **Understanding the use of real-world data in appraisals of cancer therapy:**  
5  
6  
7 **a protocol for data extraction**

8  
9 Jiyeon Kang<sup>1</sup>, John Cairns<sup>1</sup>

10  
11  
12 <sup>1</sup>Department of Health Service Research and Policy,

13  
14 Faculty of Public Health and Policy,

15  
16  
17 London School of Hygiene and Tropical Medicine, London, UK

18  
19  
20 Corresponding author: Jiyeon Kang ([Jiyeon.Kang@lshtm.ac.uk](mailto:Jiyeon.Kang@lshtm.ac.uk))

21  
22  
23 15-17 Tavistock place, London, WC1H 9SH, UK

24  
25  
26 Word count: 4,169

27  
28  
29 Keywords: Real-world data (RWD), Health Technology assessment (HTA), economic  
30 evaluation, oncology medicine, National Institute for Health and Care Excellence (NICE)

31  
32  
33  
34  
35  
36  
37  
38 **ABSTRACT**

39  
40  
41 **Introduction**

42  
43  
44 Due to the limitations of relying on randomised controlled trials, the potential benefits of real-  
45 world data (RWD) in enriching evidence for health technology assessment (HTA) are  
46 highlighted. Despite increased interest in RWD, there is limited systematic research  
47 investigating how RWD has been used in HTA. The main purpose of this protocol is to extract  
48 relevant data from National Institute for Health and Care Excellence (NICE) appraisals in a  
49 transparent and reproducible manner in order to determine how NICE has incorporated a  
50 broader range of evidence in the appraisal of oncology medicines.  
51  
52  
53  
54  
55  
56  
57  
58  
59  
60

## Methods and analysis

The appraisals issued between January 2011 to May 2021 are included following inclusion criteria. The data extraction tool newly developed for this research includes the critical components of economic evaluation. The information is extracted from identified appraisals in accordance with extraction rules. The data extraction tool will be validated by a second researcher independently. The extracted data will be analysed quantitatively to investigate to what extent RWD has been used in appraisals. This is the first protocol to enable data to be extracted comprehensively and systematically in order to review the use of RWD.

## Ethics and dissemination

This study is approved by the Ethics Committee of the London School of Hygiene and Tropical Medicine on 14 November 2019 (17315). Results will be published in peer-reviewed journals.

## STRENGTHS AND LIMITATIONS OF THIS STUDY

### Strengths

- This protocol enables data to be extracted in a transparent and systematic manner for the study of how RWD has been used in NICE appraisals.
- It includes all the different ways an economic evaluation might use RWD.
- This study facilitates systematic understanding of the use of RWD in NICE appraisals over the last 10 years.

### Limitations

1  
2  
3  
4 - Since it is focussed on cancer, the methods and eventually the findings are to some extent  
5  
6 cancer-specific.  
7

8  
9  
10 - The extraction protocol is not fully applicable to the practice of other HTA bodies as much  
11  
12 of the protocol reflects the NICE appraisal process. However, the protocol could be modified  
13  
14 to reflect the HTA context in different countries.  
15  
16

## 17 18 19 20 21 **INTRODUCTION**

22  
23  
24 In the last few years, interest in real-world data (RWD) has grown in health care decision-  
25  
26 making (1). Health Technology Assessment (HTA) requires valid and reliable information for  
27  
28 the systematic evaluation of health technology. Randomised controlled trials (RCTs) have  
29  
30 mainly provided the information (2). However, it is challenging to meet all information needs  
31  
32 from RCTs since the new generation of therapies pose several assessment challenges. For  
33  
34 example, when treatment options are expanding rapidly, it is increasingly unlikely that there  
35  
36 are RCTs featuring all the relevant comparators. Furthermore, the traditional design of RCTs  
37  
38 is possibly less appropriate for new technologies such as those targeting rare genetic  
39  
40 mutations or where there may be ethical issues with control arms. Another barrier to  
41  
42 obtaining all the relevant information for HTA from RCTs concerns the extrapolation of  
43  
44 survival. RCTs observe the clinical outcome for a certain period. Extrapolation is required in  
45  
46 order to incorporate the survival data from RCTs in the health economic model (3). It is more  
47  
48 challenging to identify the most appropriate extrapolation the shorter the duration of the trial.  
49  
50 If survival data from RCTs are based on a very limited observation period, the extrapolation  
51  
52 of the survival curve is likely to fail to predict the long-term effect (4). Moreover, RCTs tend  
53  
54  
55  
56  
57  
58  
59  
60

1  
2  
3  
4 to include strictly controlled populations.  
5  
6

7 The potential benefits of RWD in enriching evidence for HTA are highlighted by the limitations  
8 of relying on RCTs (5). This research focuses on the use of RWD in HTA by the National Institute  
9 for Health and Care Excellence (NICE). As a leading HTA agency, NICE has achieved an  
10 international reputation for rigorous development and application of scientific methods to  
11 appraise new health technologies to provide its decisions with robust and fair justification (6).  
12 More importantly, NICE is noted for the transparency of its processes, responsiveness to  
13 change, and commitment to using the best available evidence (7). The evidence is structurally  
14 well-documented enough to find the key information and available on the NICE website.  
15 Therefore, review of these appraisals can provide comprehensive information on the  
16 evidence used for decision-making. In April 2020, NICE signalled its intention to integrate  
17 broader types of data in developing NICE guidance (8). Although it is primarily a statement of  
18 intent, it is not a new development in NICE practice since NICE already incorporates a diverse  
19 range of published scientific evidence when developing its guidance on health technologies.  
20 For example, UK audit data (TA255, 2012), Hospital Episode Statistics (TA559, 2018) and  
21 registry data such as the Edinburgh Ovarian Cancer Database (TA598, 2019), Surveillance,  
22 Epidemiology, and End Result program (TA562, 2019) have been used in the development of  
23 NICE technology appraisal (TA) guidance. While a wide range of data are already used in NICE  
24 guidance, there is limited understanding regarding how and where RWD has been used, and  
25 in which circumstances RWD is accepted as relevant. Research is required to investigate  
26 systematically patterns in the use of RWD and to understand the driving forces behind its use  
27 in NICE appraisals.  
28  
29  
30  
31  
32  
33  
34  
35  
36  
37  
38  
39  
40  
41  
42  
43  
44  
45  
46  
47  
48  
49  
50  
51  
52  
53  
54  
55  
56  
57  
58  
59  
60

Several researchers have reviewed practice across HTA bodies (9,10) or reported the use of

1  
2  
3  
4 RWD in HTA (11). However, little systematic research has been conducted. Important  
5  
6 information is missing such as how they included literatures without selection bias, which  
7  
8 parts of evidence were reviewed, whether they have clearly defined RWD and justified or  
9  
10 explained why this definition is relevant and how different HTA systems were compared given  
11  
12 their different practices. Roberts et al. addressed the potential role of RWD in bridging the  
13  
14 evidence gaps (12). However, they illustrate the use of RWD with a few examples, rather than  
15  
16 providing a fuller picture of current practice when using RWD. Bullement et al. recently  
17  
18 reviewed how RWD informed single technology appraisals of cancer drugs in NICE (13).  
19  
20 Although this study follows a more systematic approach to review the use of RWD, it does  
21  
22 not fully explain how the data were extracted and what criteria were used to judge the use of  
23  
24 data. As the process of reviewing appraisals is not clear enough, it is unclear whether the  
25  
26 information presented provides a full picture of the use of RWD. Bullement et al. included  
27  
28 113 STAs issued between April 2011 and October 2018. As interest in RWD is increasing over  
29  
30 time, it may miss relevant information from recent years. Therefore, the careful development  
31  
32 of this extraction protocol is required to help extract the data systematically from appraisals,  
33  
34 increase the reliability of the results of the analysis and permit a more detailed description of  
35  
36 the use of RWD and analysis of factors influencing its use.  
37  
38  
39  
40  
41  
42  
43  
44  
45

46 A protocol is required to ensure the consistency of data extraction so that the risk of  
47  
48 unsystematic data collection is reduced. The main purpose of this protocol is to extract data  
49  
50 from NICE appraisals in a transparent and reproducible manner to answer, “how has NICE  
51  
52 incorporated a broad range of evidence in the appraisal of oncology medicines.” Without  
53  
54 proper justification and operational rules, the data are likely to be collected erroneously, with  
55  
56 a risk of biasing the analysis. The extracted data are expected to be objective and less biased.  
57  
58  
59  
60

1  
2  
3  
4 With such data, the analysis can provide more robust answers to questions regarding how  
5  
6 RWD has been used in NICE technology appraisals. Furthermore, this protocol facilitates the  
7  
8 development of a rich dataset which can highlight not just where RWD has been used but also  
9  
10 what types of evidence have been used in the HTA process in line with NICE's interest in  
11  
12 incorporating a broad range of evidence. The data can be analysed to answer the research  
13  
14 questions in depth.  
15  
16  
17  
18  
19  
20  
21  
22

## 23 **METHODS AND ANALYSIS**

24  
25  
26 Figure 1 simplifies the process of the research. NICE appraisal documents are identified  
27  
28 following inclusion criteria. The information is extracted from identified appraisals in  
29  
30 accordance with extraction rules. The extraction tool includes general appraisal information  
31  
32 and appraisal-specific information such as characteristics of the main clinical evidence and  
33  
34 the economic evaluation model.  
35  
36  
37  
38  
39  
40  
41

### 42 **Definition of RWD**

43  
44  
45 Before extracting information about the use of RWD in NICE technology appraisals, a  
46  
47 definition of RWD is clearly required. RWD is an umbrella term which covers broad categories  
48  
49 of data. Although RWD is increasingly addressed in the literature, there is no consensus over  
50  
51 the definition. In the NICE Evidence Standards Framework for Digital Health Technologies,  
52  
53 NICE adopts the definition of Innovative Medicines Initiative Get Real, data not collected in  
54  
55 the context of RCTs, but either primary research data collected in a manner which reflects  
56  
57 how interventions would be used in routine clinical practice or secondary research data  
58  
59  
60



1  
2  
3  
4 derived from routinely collected data (14). The definition of RWD used by the Association of  
5  
6 the British Pharmaceutical Industry is data obtained by any non-interventional methodology  
7  
8 (15). One of the commonly used definitions of RWD is that of the US Food and Drug  
9  
10 Administration (FDA), “data relating to patient health status and/or the delivery of health care  
11  
12 routinely collected from a variety of sources”(16). Another widely cited study regarding the  
13  
14 definition of RWD is Makady et al. (1). In their study, RWD was categorised into four groups  
15  
16 focusing more on the study design used to collect the data while the FDA definition highlights  
17  
18 the frequency of collecting health-related information and the regularity of obtaining the  
19  
20 information. Each definition has relatively large operational flexibility, which could potentially  
21  
22 introduce bias into the data extraction. For instance, an observational study which collected  
23  
24 patient data *once* from routine clinical practice can be classified differently depending on  
25  
26 definitions. Under the definition of FDA, it is not RWD as the data is not routinely collected.  
27  
28 On the other hand, it is RWD under the definition in Makady et al., data collected in a non-  
29  
30 experimental setting. Requiring data to meet both definitions can help to reduce the  
31  
32 discretionary interpretation of RWD. However, given that there is no consensus on the  
33  
34 definition of RWD, the definition can be questioned by other researchers who have different  
35  
36 views. Hence, this study uses two working definitions adopting two of the categories of RWD  
37  
38 explored by Makady and his colleagues’ study together matching the FDA’s definition of RWD  
39  
40 (figure 2). In this research, RWD is defined as the data relating to patient health status and/or  
41  
42 the delivery of health care routinely collected from non-experimental settings (working  
43  
44 definition 1) or non-interventional setting (working definition 2).  
45  
46  
47  
48  
49  
50  
51  
52  
53  
54  
55  
56  
57  
58  
59  
60

### Step 1 Appraisal selection

1  
2  
3  
4 The first step of the research identifies the NICE TA guidance which meets the eligibility  
5 criteria. TA guidance are publicly available on the NICE website ([www.nice.org.uk](http://www.nice.org.uk)). Relevant  
6 appraisal documents including the final scope, the manufacturer's submission, the evidence  
7 review group (ERG) report, and the final appraisal determination are available for each  
8 appraisal. The appraisal documents are reviewed to establish whether RWD is used to  
9 determine any components of the economic evaluation.  
10  
11  
12  
13  
14  
15  
16  
17  
18

#### 19 Data sources

20  
21  
22 This research exclusively includes single-technology appraisals (STA) of oncology medicines.  
23 Figure 3 shows the inclusion and exclusion criteria. One aim is to understand how and where  
24 RWD has been used in the appraisal process. Therefore, it is necessary that the appraisal  
25 process should be identical. However, the STA and multiple technology appraisal (MTA)  
26 processes differ substantially. It is challenging to gather same information in the MTA process  
27 as the MTA has different format of appraisal documents to assess several drugs or treatments  
28 used for one or more condition (17). Besides, STAs are the predominant form in practice, 93%  
29 of appraisals of oncology. The small number of the MTAs, only eighteen oncology appraisals,  
30 limits the scope for such a comparison. Therefore, this study focuses on STAs, which assess a  
31 single treatment. It also limits analysis to appraisals published between January 2011 and May  
32 2021 in order to have a long enough time period to capture potential changes over time in  
33 how RWD has been used but also recognising that STAs from earlier years might be of less  
34 interest because enthusiasm for RWD was largely absent. Here, the date when guidance was  
35 published refers to the date of issuing the final appraisal determination document (FAD)  
36 which can be regarded as an end point of the evidence synthesis process (in the absence of a  
37 successful appeal).  
38  
39  
40  
41  
42  
43  
44  
45  
46  
47  
48  
49  
50  
51  
52  
53  
54  
55  
56  
57  
58  
59  
60

## Operational separation

Following the inclusion and exclusion criteria, appraisals are identified. Among these appraisals, some TAs have more than one clinical indication or combination therapy. It is possible that different evidence was used for the different patient populations in the appraisal. Hence, these appraisals are separated by clinical conditions or treatment lines and reviewed in order to avoid losing information. For example, olaparib for maintenance treatment of relapsed platinum-sensitive ovarian, fallopian tube or peritoneal cancer (NICE TA620) has two separate recommendations for different conditions. While a patient who has a BRCA1 or BRCA2 mutation and has had three or more courses of platinum-based chemotherapy is eligible for the treatment, a patient who has a BRCA1 or BRCA2 mutation and has had two courses of platinum-based chemotherapy is able to use the treatment within Cancer Drug Fund. Consequently, these indications are included separately in the analysis.

## Step 2: Data extraction

A detailed protocol is developed to guide the extraction of essential data for each appraisal in order to investigate the use of RWD in NICE technology appraisals in a systematic and reproducible manner. The protocol is designed to extract information from both the manufacturer's submission and the final appraisal document regarding where RWD was used in the manufacturer's cost-effectiveness analysis, and to determine the extent to which the committee supported the use of RWD in these appraisals and understand what factors are associated with supporting or not supporting the use. **Error! Reference source not**

1  
2  
3  
4 **found.Error! Reference source not found.** shows the structure of the data extraction  
5  
6 template. In summary, the extraction tool consists of three parts – general information,  
7  
8 explanatory variables, and outcome variables. The outcome of interest being the use of RWD.  
9  
10 The outcome variables record use or non-use of RWD for different elements of the economic  
11  
12 evaluation. The tool extensively includes important elements of an economic evaluation. The  
13  
14 study will analyse the data to investigate patterns in the use of RWD in NICE appraisals, and  
15  
16 the association between several factors and the use of RWD. Explanatory variables are  
17  
18 suggested based on the hypotheses presented under Step 4: data analysis. All items in the  
19  
20 extraction template and how to code them are described in the glossary (Supplement 1). To  
21  
22 convey the type of information to be extracted, some examples from a preparatory review  
23  
24 are presented in the glossary.  
25  
26  
27  
28  
29  
30  
31  
32  
33  
34

### 35 Parametric and non-parametric use

36  
37  
38 This protocol distinguishes two categories of outcome variable, parametric and non-  
39  
40 parametric use of RWD. Parametric use of RWD is the use of such data to define the numerical  
41  
42 value of a specific variable in the economic evaluation, whereas non-parametric use is where  
43  
44 data are utilised to develop the model structure or to determine the scope of the evaluation.  
45  
46 For example, when RWD are used to estimate survival, this will be counted as parametric use  
47  
48 with respect to clinical outcome (OS/PFS). Parametric use is reviewed and recorded for the  
49  
50 intervention and comparators separately as different data could be used in the cost-  
51  
52 effectiveness analysis. An example of non-parametric use of RWD can be found in the  
53  
54 appraisal of palbociclib for previously untreated, hormone receptor-positive, HER2-negative,  
55  
56 locally advanced or metastatic breast cancer (NICE TA495). In this appraisal, the company  
57  
58  
59  
60

1  
2  
3  
4 used information from a study of medical records to determine the subsequent treatments  
5  
6 to be assumed in the economic model. This case is regarded as non-parametric use since RWD  
7  
8 was used to specify the treatment sequence but not the quantity and cost of subsequent  
9  
10 treatment.  
11  
12

13  
14 Parametric and non-parametric use of RWD and the different categories shown in figure 4,  
15  
16 facilitate more consistent data extraction by highlighting the different ways RWD might be  
17  
18 used, and provide greater flexibility to the testing of hypotheses regarding use of RWD, and  
19  
20 the exploration of ways to measure the intensity of use of RWD.  
21  
22  
23

## 24 25 Coding

26  
27  
28 A key issue with respect to improving the reliability of data extraction is how many distinct  
29  
30 variables are identified and how finely divided are the potential responses to the variables in  
31  
32 the extraction template. There are two options, in order not to lose information, have many  
33  
34 distinct variables with binary responses, or merge many variables but have multi-level  
35  
36 responses. In case of the variables coarsely divided, the outcome of the extraction is so blunt  
37  
38 that it cannot fully capture how RWD is used. Likewise, the variables overscrupulously divided  
39  
40 are less likely to provide valid outcome to show the pattern of the use of RWD in the analysis.  
41  
42 It is closely linked to how far should it break down the levels of each coding. In an effort to  
43  
44 sophisticatedly divide variables, the template took an “including all and combining trivia”  
45  
46 approach. It helps to include all relevant variables where potentially data can be used, but  
47  
48 also to list variables more concisely by merging unnecessarily trivial variables so that the  
49  
50 outcome of the extraction can be concretely analysed. Based on two categories, the  
51  
52 parametric and non-parametric use of RWD, the areas where data are likely to be used are  
53  
54 carefully searched. As a backbone of the extraction structure, dividing two categories helped  
55  
56  
57  
58  
59  
60

1  
2  
3  
4 to search the component systematically. Under the parametric use, the clinical effectiveness,  
5  
6 health utility, cost side were thoroughly reviewed. After sorting variables, they were  
7  
8 aggregated if the information is minor and can be categorised into one variable. The areas  
9  
10 where aggregation is mostly required are resource use in economic evaluation. In order to  
11  
12 reflect the current practice, especially cost part has naturally incorporated RWD into the  
13  
14 analysis. It is less informative to collapse the variables in resource use since the use of RWD  
15  
16 in cost part is already expected. Also, different health technology can include different  
17  
18 resource use reflecting its characteristics. Counting every cost part is not an accurate way to  
19  
20 understand why and how RWD was used. Hence, the variable, resource use is not  
21  
22 differentiated. However, variables such as volume of treatment or dose adjustment are  
23  
24 separated from resource use as these data have potentially critical impacts on the result of  
25  
26 economic evaluation.  
27  
28  
29  
30  
31  
32  
33

### 34 **Step 3: Data validation**

35  
36  
37 The data extraction tool will be validated by a second researcher independently repeating the  
38  
39 data extraction for a random sample of appraisals (20% of all appraisals). This validation is  
40  
41 required to check the replicability of the data extraction and the clarity of the extraction tool.  
42  
43 Any disagreements between the researchers will be resolved by discussion. Peer discussion  
44  
45 following the validation process is important not only to check the clarity of this protocol but  
46  
47 also to investigate any deviations caused by unclear information. It will help pinpoint where  
48  
49 a higher degree of subjectivity may arise in the data extraction.  
50  
51  
52  
53  
54

### 55 **Step 4: Data analysis**

56  
57  
58 The extracted data will be analysed quantitatively in two different ways. First, a descriptive  
59  
60

1  
2  
3  
4 analysis will summarise where and how RWD has been used in appraisals. This will be  
5  
6 supplemented by an analysis of the intensity of use of RWD in order to explore changes in the  
7  
8 pattern of use of RWD over time and differences with respect to cancer type. Secondly, a  
9  
10 regression analysis will be performed to investigate which factors are associated with the  
11  
12 greater use of RWD in a company's submission. A literature review and a pilot study were  
13  
14 conducted to identify factors potentially associated with the use of RWD. Five factors were  
15  
16 identified and formulated into hypotheses about increased use of RWD (**Error! Reference**  
17  
18 **source not found.**).

### 27 **Methodological issues**

28  
29  
30 The design of this data extraction protocol, in which information is reliably and repeatedly  
31  
32 extracted across appraisals, will allow us to review evidence for the use of RWD more  
33  
34 systematically than could be obtained from a number of case studies. However, several  
35  
36 methodological challenges can be anticipated. This section addresses these challenges and  
37  
38 how they might be mitigated.

#### 43 **Issue 1: Unclearly stated information**

44  
45  
46 Overall, NICE appraisals clearly describe the data used in the evidence synthesis. However, in  
47  
48 some cases, a result of systematic research is listed without clarification that the study is  
49  
50 included in evidence synthesis. In appraisals, systematic literature review is carried out to  
51  
52 identify all relevant evidence. Clinical effectiveness evidence is carefully examined and  
53  
54 described in detail, with clear reasons for the inclusion and exclusion of studies. On the other  
55  
56 hand, the systematic search for resource use and cost information usually enumerates  
57  
58  
59  
60

1  
2  
3  
4 miscellaneous studies with bibliographic information and a summary, but the critical review  
5  
6 of minor components of health cost is sometimes missing. While a manufacturer provides the  
7  
8 result of the assessment, it is possible that some manufacturers' submissions do not clearly  
9  
10 state whether a particular study is used to determine which elements of resource use made  
11  
12 up the health state costs. This leaves room for discretion how to record the information.  
13  
14  
15

### 16 17 Issue 2: Level of aggregation 18

19  
20 An important question is the most appropriate level of aggregation. This is best illustrated  
21  
22 with respect to healthcare costs. It would be possible to have a variable indicating use or non-  
23  
24 use of RWD for every single element of cost (distinguishing GP visits, frequency of  
25  
26 hospitalization, and so on). At the opposite extreme there could be a single cost variable  
27  
28 which indicated whether RWD was used for any element of cost. The more aggregated the  
29  
30 measure the greater the loss of information, but some elements of cost are much more  
31  
32 important than others and the potential analyses of the use of RWD will multiply greatly if  
33  
34 there is no attempt at aggregation. The current protocol tries to balance the advantages and  
35  
36 disadvantages of different levels of aggregation by combining several elements into a health  
37  
38 state cost variable but distinguishing other important components of cost such as, such as  
39  
40 volume of treatment, dose adjustment and resource use for adverse events.  
41  
42  
43  
44  
45  
46  
47

### 48 Issue 3: No consensus on the definition of RWD. 49

50  
51 This research uses the definition of RWD by FDA. The distinctive part of the definition used in  
52  
53 this research is 'routinely collected' data from 'non-experimental study'. Although the  
54  
55 definition provides specific and clear definition for this research, there is no consensus as how  
56  
57 best to define RWD. It is likely that other definitions of RWD are preferred by other  
58  
59  
60



1  
2  
3  
4 researchers and the data extracted will be influenced by the definition of RWD chosen. Two  
5  
6 definitions of RWD are used in this protocol. Although the definition can be questioned by  
7  
8 other researchers who have different views, the various definitions overlap considerably. It is  
9  
10 thus unlikely there will be a marked divergence in the data extracted when using the different  
11  
12 definitions.  
13  
14

#### 15 16 17 Design to mitigate methodological issues 18

19  
20 Several operational rules are designed to minimise bias likely to come from the  
21  
22 methodological issues encountered in the data extraction. First, the study will record the  
23  
24 unclear information as 'no RWD.' The separation of 'not clear' is an intuitive way to extract  
25  
26 the data, however, it is not useful for the analysis. The code 'not clear' cannot be  
27  
28 independently analysed. It will be combined into 'no RWD' when analysing the data. In  
29  
30 addition, having a 'not clear' category is unlikely to improve data quality. It is also closely  
31  
32 linked to the reason for using binary code in this research. Decomposing levels of codes into  
33  
34 several small parts can help to extract the information as it is. However, it is more likely to  
35  
36 increase the complexity since trivial information is individually recorded. The extracted trivial  
37  
38 data should be interpreted based on another operational rule. It is subject to increased error,  
39  
40 particularly when testing hypotheses. For these reasons, the benefit of breaking up the level  
41  
42 of codes into multilevel does not outweigh the benefit of binary codes while separation is  
43  
44 much more time consuming. Instead of adapting multilevel codes, this study suggests an  
45  
46 alternative, an intensity analysis which helps to understand valid difference within diverse  
47  
48 patterns of the use of RWD. When looking at the pattern of the use of RWD, the intensity of  
49  
50 the use of RWD will be analysed. Simply counting the number of times RWD is used is not an  
51  
52 accurate way to understand why and how RWD was used. Alternatively, this study focuses on  
53  
54  
55  
56  
57  
58  
59  
60

1  
2  
3  
4 variables which are more critically reviewed in appraisal. Variables such as survival outcome,  
5  
6 volume of treatment and choice of comparators are more likely to influence estimated cost-  
7  
8 effectiveness. Especially, the survival outcome is the most important information in both  
9  
10 clinical and cost-effectiveness as well as one of the controversial areas where to use RWD.  
11  
12 The intensity analysis is a framework to show whether RWD is used in these components  
13  
14 alongside the quantity of the use of RWD. It can offer more benefits in deeper understanding  
15  
16 of the use of RWD than counting all miscellaneous uses of RWD.  
17  
18  
19  
20  
21  
22  
23  
24

## 25 **STRENGTHS AND LIMITATIONS**

26  
27  
28 To the best of the authors' knowledge, this is the first study protocol to investigate to what  
29  
30 extent RWD has been used in NICE appraisals. It allows the practice of extracting information  
31  
32 to be reproducible, systematic and transparent. Strengthening the reproducibility and  
33  
34 transparency of extracting process can maximise the understanding of the use of RWD by  
35  
36 allowing more accurate interpretation and use of their findings. This protocol could be  
37  
38 relevant to researchers or HTA agencies who aim to understand how various data resource  
39  
40 was used in HTA in a context of England. The findings of this protocol can provide the full  
41  
42 picture of the use of RWD in NICE appraisal over ten years. Moreover, the study findings could  
43  
44 add more value under the discussion of NICE which tries to broaden the evidence in NICE  
45  
46 practice.  
47  
48  
49  
50  
51

52  
53 The protocol has the limitation that it has been developed to study the use of RWD in NICE  
54  
55 appraisals of oncology drugs. Consequently, the data extraction protocol may not be fully  
56  
57 applicable to appraisals in other disease areas or to the different practice of other HTA bodies.  
58  
59  
60

1  
2  
3  
4 Since the documentation is significantly different depending on each country's context, it is  
5  
6 not feasible for the protocol to extract the same information as in English context. However,  
7  
8 many of the distinctions are of wider application, e.g. parametric vs non-parametric use of  
9  
10 RWD, and the taxonomy of where in an economic evaluation it might be relevant to look for  
11  
12 use of RWD. Also, the hypotheses are potentially of wider application. The results are going  
13  
14 to be specific to NICE but otherwise the structure of this research has wider application.  
15  
16 Although not fully transferrable, this protocol can be modified for use in other HTA contexts.  
17  
18  
19  
20  
21  
22  
23  
24

#### 25 **PATIENT AND PUBLIC INVOLVEMENT**

26  
27  
28 No patient involved.  
29  
30  
31  
32  
33

#### 34 **ACKNOWLEDGEMENTS**

35  
36  
37 The authors thank to David Lugo-Palacios for useful advice on clarity of data extraction and  
38  
39 validation process.  
40  
41  
42  
43  
44  
45

#### 46 **CONTRIBUTORS**

47  
48  
49 Both authors contributed to conceptualising and designing the study. JK drafted the protocol  
50  
51 manuscript. JC revised the manuscript for important intellectual content and contributed to  
52  
53 the methodology.  
54  
55  
56  
57  
58  
59  
60

## FUNDING STATEMENT

JK is supported by the Centre for Cancer Biomarkers, University of Bergen funded by the Research Council of Norway grant number (223250). The funder was not involved in the design of the protocol or decision to submit the protocol for publication, nor will they be involved in any aspect of the study conduct.

## COMPEPTING INTEREST STATEMENT

None declared.

## FULL REFERENCES

1. Makady A, de Boer A, Hillege H, Klungel O, Goettsch W. What Is Real-World Data? A Review of Definitions Based on Literature and Stakeholder Interviews. *Value Heal* [Internet]. 2017;20(7):858–65. Available from: <http://dx.doi.org/10.1016/j.jval.2017.03.008>
2. Chan K, Nam S, Evans B, Deoliveira C, Chambers A, Gavura S, et al. Developing a framework to incorporate real-world evidence in cancer drug funding decisions: The Canadian Real-world Evidence for Value of Cancer Drugs (CanREValue) collaboration. *BMJ Open*. 2020 Jan 7;10(1).
3. Latimer N. Survival Analysis For Economic Evaluations Alongside Clinical Trials - Extrapolation with Patient-Level Data - PubMed - NCBI. *Med Decis Mak* [Internet]. 2013 [cited 2019 May 14];33(6):743–54. Available from:

- 1  
2  
3  
4 <https://www.ncbi.nlm.nih.gov/pubmed/27905716>  
5  
6  
7  
8 4. Davies C, Briggs A, Lorgelly P, Garellick G, Malchau H. The “hazards” of extrapolating  
9 survival curves. *Med Decis Mak* [Internet]. 2013 Apr [cited 2020 Aug 17];33(3):369–  
10 80. Available from: <https://pubmed.ncbi.nlm.nih.gov/23457025/>  
11  
12  
13  
14  
15 5. Katkade VB, Sanders KN, Zou KH. Real world data: An opportunity to supplement  
16 existing evidence for the use of long-established medicines in health care decision  
17 making. *J Multidiscip Healthc*. 2018;11:295–304.  
18  
19  
20  
21  
22  
23 6. Littlejohns P, Chalkidou K, Culyer AJ, Weale A, Rid A, Kieslich K, et al. National  
24 Institute for Health and Care Excellence, social values and healthcare priority setting  
25 [Internet]. Vol. 112, *Journal of the Royal Society of Medicine*. SAGE Publications Ltd;  
26 2019 [cited 2021 May 11]. p. 173–9. Available from:  
27 <https://journals.sagepub.com/doi/full/10.1177/0141076819842846>  
28  
29  
30  
31  
32  
33  
34  
35  
36 7. Schlander M. Health Technology Assessments by the National Institute for Health and  
37 Clinical Excellence. *Health Technology Assessments by the National Institute for*  
38 *Health and Clinical Excellence*. Springer New York; 2007.  
39  
40  
41  
42  
43  
44 8. Broader types of data to be used in development of NICE guidance | News and  
45 features | News | NICE [Internet]. [cited 2020 May 5]. Available from:  
46 [https://www.nice.org.uk/news/article/broader-types-of-data-to-be-used-in-](https://www.nice.org.uk/news/article/broader-types-of-data-to-be-used-in-development-of-nice-guidance)  
47 [development-of-nice-guidance](https://www.nice.org.uk/news/article/broader-types-of-data-to-be-used-in-development-of-nice-guidance)  
48  
49  
50  
51  
52  
53  
54 9. Wang S, Goring SM, Lozano-Ortega G. Inclusion of real-world evidence in submission  
55 packages to health technology assessment bodies: What do current guidelines  
56 indicate? *Value Heal* [Internet]. 2016 May 1 [cited 2020 Jun 22];19(3):A287. Available  
57  
58  
59  
60

- 1  
2  
3  
4 from: <http://www.valueinhealthjournal.com/article/S1098301516008317/fulltext>  
5  
6  
7  
8 10. Pietri G, Masoura P. Market Access and Reimbursement: The Increasing Role of Real-  
9  
10 World Evidence. Value Heal [Internet]. 2014 Nov 1 [cited 2020 Jun 22];17(7):A450–1.  
11  
12 Available from:  
13  
14 <http://www.valueinhealthjournal.com/article/S1098301514031465/fulltext>  
15  
16  
17 11. Harwood M, Deighton A, Mickle A, Qian C, Szabo S. The use of real-world data in  
18  
19 health technology assessment of medications for rare diseases. Value Heal [Internet].  
20  
21 2019 Nov 1 [cited 2020 Sep 10];22:S863. Available from:  
22  
23 <http://www.valueinhealthjournal.com/article/S1098301519348296/fulltext>  
24  
25  
26 12. Roberts MH, Ferguson GT. Real-World Evidence: Bridging Gaps in Evidence to Guide  
27  
28 Payer Decisions. PharmacoEconomics - Open [Internet]. 2021 Mar 18 [cited 2021 Jun  
29  
30 29];5(1):3–11. Available from: <https://doi.org/10.1007/s41669-020-00221-y>  
31  
32  
33 13. Bullement A, Podkonjak T, Robinson MJ, Benson E, Selby R, Hatswell AJ, et al. Real-  
34  
35 world evidence use in assessments of cancer drugs by NICE. Int J Technol Assess  
36  
37 Health Care [Internet]. 2020 Aug 1 [cited 2021 May 12];36(4):388–94. Available from:  
38  
39 <https://doi.org/10.1017/S0266462320000434>  
40  
41  
42 14. National Institute for Health and Care Excellence (NICE). Evidence Standards  
43  
44 Framework for Digital Health Technologies Contents. 2019.  
45  
46  
47 15. Association of the British Pharmaceutical Industry. Demonstrating value with Real  
48  
49 World data | ABPI [Internet]. 2011 [cited 2021 Jun 30]. Available from:  
50  
51 <https://www.abpi.org.uk/publications/real-world-data/>  
52  
53  
54  
55  
56  
57  
58  
59  
60

- 1  
2  
3  
4 16. FDA. Real-World Evidence [Internet]. 2020 [cited 2020 May 6]. Available from:  
5  
6 <https://www.fda.gov/science-research/science-and-research-special-topics/real->  
7  
8 [world-evidence](https://www.fda.gov/science-research/science-and-research-special-topics/real-)  
9  
10
- 11  
12 17. Guide to the multiple technology appraisal process [Internet]. [cited 2020 Aug 7].  
13  
14 Available from: [www.nice.org.uk](http://www.nice.org.uk)  
15  
16

For peer review only

1  
2  
3 **Figure Legends**  
4

5  
6 Figure 1 The process of the study  
7

8  
9 Figure 2 Flowchart to decide the definition of RWD  
10

11  
12 Figure 3 Inclusion/exclusion criteria  
13

14  
15 Figure 4 The framework for data extraction  
16

17  
18 Figure 5 Hypotheses about increased use of RWD  
19  
20  
21  
22  
23  
24

25 **Supplement Legends**  
26

27  
28 Supplement 1 Glossary of variables in extraction template  
29  
30  
31  
32  
33  
34  
35  
36  
37  
38  
39  
40  
41  
42  
43  
44  
45  
46  
47  
48  
49  
50  
51  
52  
53  
54  
55  
56  
57  
58  
59  
60



1  
2  
3  
4  
5  
6  
7  
8  
9  
10  
11  
12  
13  
14  
15  
16  
17  
18  
19  
20  
21  
22  
23  
24  
25  
26  
27  
28  
29  
30  
31  
32  
33  
34  
35  
36  
37  
38  
39  
40  
41  
42  
43  
44  
45  
46  
47  
48  
49  
50  
51  
52  
53  
54  
55  
56  
57  
58  
59  
60

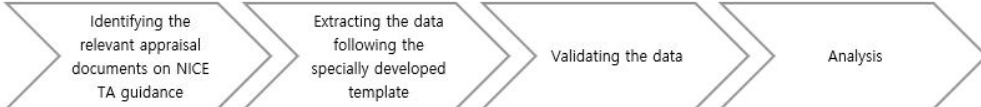

Figure 1 The process of the study

84x11mm (240 x 240 DPI)

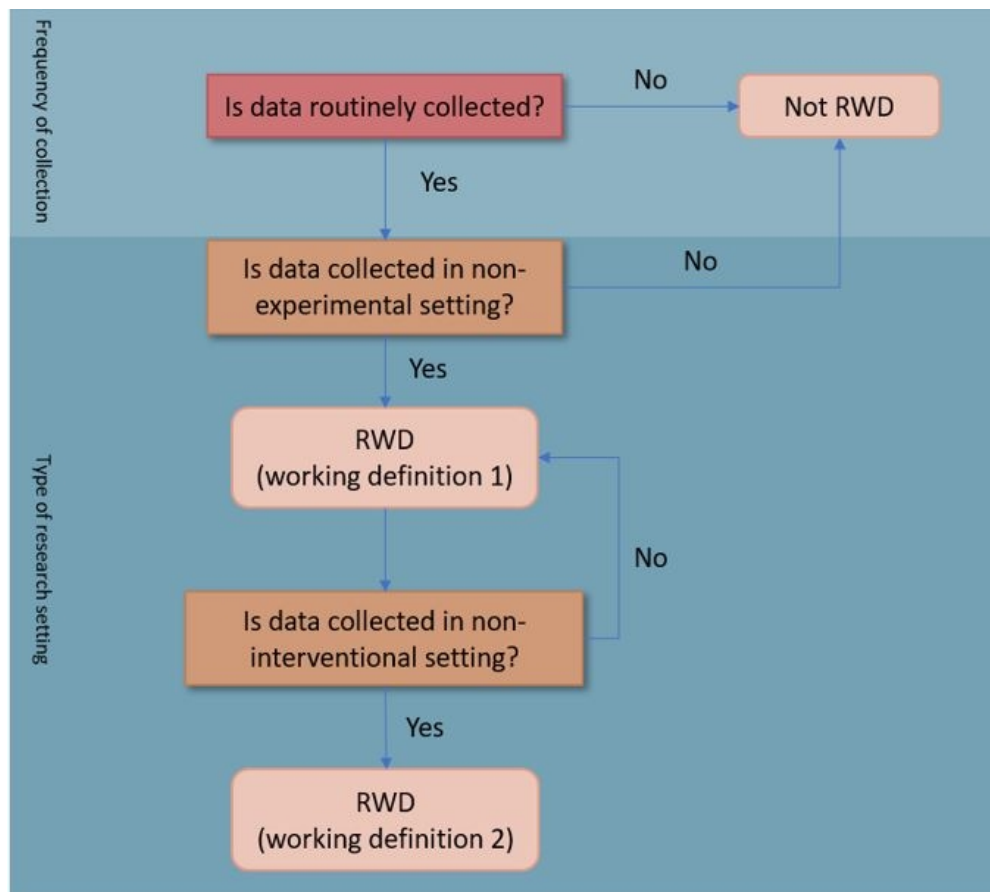

Figure 2 Flowchart to decide the definition of RWD

71x64mm (240 x 240 DPI)

|                                                                                                                       |
|-----------------------------------------------------------------------------------------------------------------------|
| Inclusion criteria                                                                                                    |
| - STA of oncology medicine                                                                                            |
| - Appraisals issued from January 2011 to May 2021                                                                     |
| Exclusion criteria                                                                                                    |
| - Appraisal of technology for preventing the complications of cancer                                                  |
| - Appraisal of surgical practice and other therapeutic therapies                                                      |
| - Appraisals for which evidence is not available (withdrawn appraisals) or was never supplied (terminated appraisals) |

Figure 3 Inclusion/exclusion criteria

131x35mm (240 x 240 DPI)

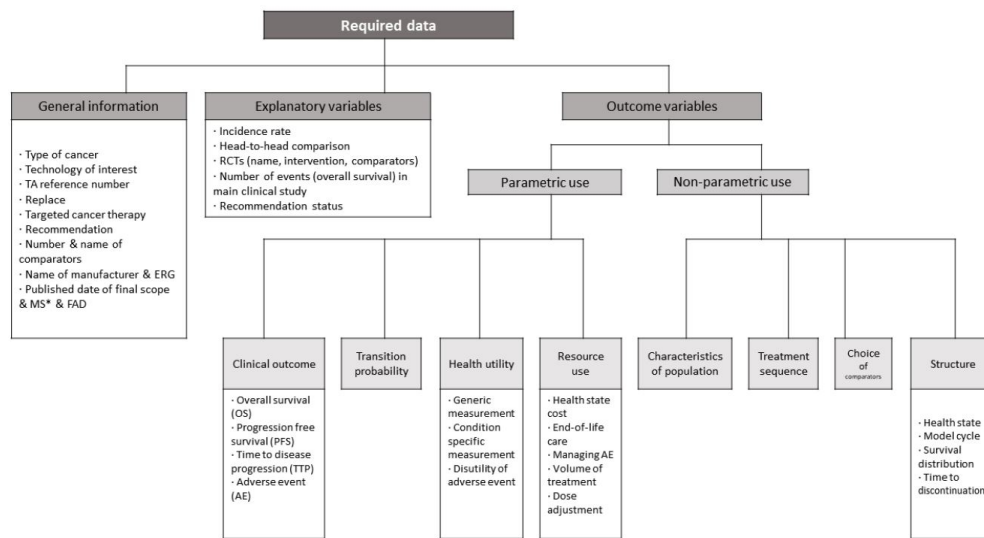

\* Published date of MS: the date when it was submitted by the manufacturer, which is stated on manufacturer submission document

Figure 4 The framework for data extraction

141x84mm (240 x 240 DPI)

- 1) Poor internal/external validity of the clinical trial is associated with greater use of RWD.
- 2) Absence of direct (head-to-head) comparison is associated with greater use of RWD.
- 3) Low incidence rate of the disease is associated with greater use of RWD.
- 4) Immature survival data in the clinical trial are associated with greater use of RWD.
- 5) The technology having been recommended in previous NICE TA guidance is associated with greater use of RWD.

Figure 5 Hypotheses about increased use of RWD

93x24mm (240 x 240 DPI)

## Supplement 1 Glossary of variables in extraction template

| General information     |                                                                                                                                                                                                                                                                                 |                                                                                                                                                                                                                                       |
|-------------------------|---------------------------------------------------------------------------------------------------------------------------------------------------------------------------------------------------------------------------------------------------------------------------------|---------------------------------------------------------------------------------------------------------------------------------------------------------------------------------------------------------------------------------------|
| Variable                | Explanation                                                                                                                                                                                                                                                                     | Coding                                                                                                                                                                                                                                |
| Type of cancer          | The NICE classification of the cancer<br>(website: <a href="https://www.nice.org.uk/guidance/conditions-and-diseases/cancer">https://www.nice.org.uk/guidance/conditions-and-diseases/cancer</a> )                                                                              | Bladder cancer=1, Blood and bone marrow cancer =2, Breast cancer=3, Colorectal=4, Neuroblastoma=5, Head and neck=6, Liver=7, Lung=8, Oesophageal=9, Ovarian=10, Pancreatic=11, Prostate=12, Renal=13, Skin=14, Stomach=15, Sarcoma=16 |
| Technology of interest  | The name of drug in the current appraisal. If it is combination therapy, the key technology which manufacturer focuses on will be taken here.                                                                                                                                   | Narrative description                                                                                                                                                                                                                 |
| Indication              | Clinical indications which are addressed in Final Appraisal Determination (FAD) document                                                                                                                                                                                        | Narrative description                                                                                                                                                                                                                 |
| TA number               | the reference number of the technology guidance                                                                                                                                                                                                                                 | Narrative description                                                                                                                                                                                                                 |
| Replaced                | Whether TA guidance has been replaced or not                                                                                                                                                                                                                                    | None= 0<br>If replaced, the TA reference number and year                                                                                                                                                                              |
| Targeted cancer therapy | Treatment that uses drugs or other substances to identify and attack specific types of cancer cells                                                                                                                                                                             | Non-targeted therapy = 0, targeted therapy = 1, not sure = Narrative description                                                                                                                                                      |
| Recommendation          | the classification of recommendations made by the NICE committee in FAD document<br>- Not recommended: 0<br>- Recommended (in line with marketing authorisation): 1<br>- Recommended (in line with marketing authorisation) in CDF:2<br>- Optimised: 3<br>- Optimised in CDF: 4 | Not recommended=0, recommended=1, recommended (cdf)=2, optimised=3, optimised (cdf)=4                                                                                                                                                 |
| number of comparators   | Count the number of comparators in each manufacturer submission or FAD document. The information in manufacturer submission and FAD is recorded in the separated rows (manufacturer row/committee row).                                                                         | Number in the manufacturer's submission                                                                                                                                                                                               |
| name of comparators     | Record the name of comparators in manufacturer submission or FAD document                                                                                                                                                                                                       | Narrative description                                                                                                                                                                                                                 |

|                                |                                                                                                                                                                                                                                                                        |                                                  |
|--------------------------------|------------------------------------------------------------------------------------------------------------------------------------------------------------------------------------------------------------------------------------------------------------------------|--------------------------------------------------|
| name of manufacturer           | the name of manufacturer in manufacturer submission                                                                                                                                                                                                                    | Narrative description                            |
| name of the ERG                | the name of the ERG (evidence review group)/AG (assessment group) in ERG critiques or AG reports                                                                                                                                                                       | Narrative description                            |
| published date of final scope  | the date of final scope as MM/YYYY                                                                                                                                                                                                                                     | Date (MM/YYYY)                                   |
| published date of manufacturer | the date of manufacturer submission as MM/YYYY.                                                                                                                                                                                                                        | Date (MM/YYYY)                                   |
| published date of FAD guidance | the date of FAD document as MM/YYYY                                                                                                                                                                                                                                    | Date (MM/YYYY)                                   |
| <b>Explanatory variables</b>   |                                                                                                                                                                                                                                                                        |                                                  |
| <b>Variable</b>                | <b>Explanation</b>                                                                                                                                                                                                                                                     | <b>Coding</b>                                    |
| Incidence (rate, year)         | The rate would be recorded as it is in the appraisal. Incidence rate could be found in the final scope document or in manufacturer submission document. If the figures are not identical in each document, the latest rate is recorded.                                | Narrative description                            |
| H2H                            | Whether the head-to-head clinical trial of a technology of interest exists or not, which compares with agreed comparators. The information is most likely to be found in the section: Identification and selection of relevant studies in clinical effectiveness part. | no=0, yes=1, yes but some comparators missing =2 |
| • ITC                          | ITC (indirect treatment comparison). The information could be found in the section: Indirect and mixed treatment comparisons in clinical effectiveness part.                                                                                                           | no=0, yes=1                                      |
| • RCT (technology of interest) | Main RCT used in the appraisal: the name of the H2H RCT, if it exists. Unless there is an H2H, RCT refers to the clinical trial of technology of interest in the ITC.                                                                                                  | no=0, yes=1                                      |
| - Name of RCT                  | The name of the aforementioned RCT                                                                                                                                                                                                                                     | Narrative description                            |
| - Intervention in RCT          | The name of the intervention used in the aforementioned RCT. This variable helps to identify the main technology in RCT when technology is appraised as combination therapy.                                                                                           | Narrative description                            |
| - Comparators in RCT           | The comparator of the aforementioned RCT                                                                                                                                                                                                                               | Narrative description                            |
| - Size of RCT                  | The number of participants in the aforementioned RCT                                                                                                                                                                                                                   | Number                                           |
| - Median duration of follow-up | The median duration of follow-up in the aforementioned RCT. If it is not reported, record as NR (not reported).                                                                                                                                                        | Unit: month<br>Not reported = ..                 |
| • Anchored/unanchored          | "Anchored" means that RCT of technology of interest exists, and the RCT has been linked to any other studies which evaluate the drug's effectiveness.                                                                                                                  | Not anchored=0,<br>Anchored =1                   |

|                                                     |                                                                                                                                                                                                                                                                                                                                           |                                                                                                                                |
|-----------------------------------------------------|-------------------------------------------------------------------------------------------------------------------------------------------------------------------------------------------------------------------------------------------------------------------------------------------------------------------------------------------|--------------------------------------------------------------------------------------------------------------------------------|
|                                                     | “Unanchored” means that the clinical outcome study doesn’t have any comparators which connect to other studies. For example, comparing a single-arm study with a single-arm study is “unanchored”. Also, RCTs compared without common comparators in ITC is “unanchored”.                                                                 |                                                                                                                                |
| • MAIC/STC                                          | Matching adjusted indirect comparison (MAIC), Simulated Treatment Comparison (STC). A methodology of making adjustment to increase the comparability of two distinct populations mostly among unanchored studies. But it could be used in anchored studies in case where the two populations in ITC is starkly different from each other. | Naive=0,<br>MAIC=1<br>STC=2<br>Other methods=3                                                                                 |
| Risk of bias (RoB) of RCT (direct quotation)        | In order to evaluate the internal validity of RCTs, the risk of bias, which was reported in the ERG report, will be recorded here. Information is available at the quality assessment part of the ERG report. The ERG statement is directly quoted.                                                                                       | Direct quotation from ERG documents                                                                                            |
| • Risk of bias in RCT (grade)                       | In order to conduct statistical analysis, a set of codes will be used here. The direct quotation will be classified into four groups following the number of risk factors.                                                                                                                                                                | High/good quality without mentioned weakness= 0, risk factor 1 (low) =1, risk factor 2-3 (moderate)=2, risk factor 4 (high) =3 |
| External validity of RCT                            | As narrative accounts, generalisability of RCT is reported in the ERG report whether the population of RCT properly represents the UK general population in terms of aging structure, health status and health care practice (practice-dose, subsequent treatment, etc.).                                                                 | Direct quotation from ERG documents                                                                                            |
| • External validity in RCT (grade)                  | In order to conduct statistical analysis, a set of codes will be used here. The direct quotation will be classified into three groups following the severity of generalisability assess by ERG.                                                                                                                                           | Representative without mentioned weakness= 0, Representative but minor concerns =1, Questionable generalisability =2           |
| Previously recommended in other indication          | Whether the technology has been recommended for other types of cancers besides the current indication of the technology.                                                                                                                                                                                                                  | No =0, Yes including all recommend, CDF, Optimised, Optimised (cdf) =1                                                         |
| • TA number & date of appraisal in other indication | If it was recommended for other indications, record the TA number and the date of the FAD documents (MM/YYYY).                                                                                                                                                                                                                            | Narrative description of date                                                                                                  |
| Previous recommended treatment in the same cancer   | Whether the technology has been recommended for other treatment lines in the same type of cancer.                                                                                                                                                                                                                                         | No =0, Yes including all recommend, CDF, Optimised, Optimised (cdf) =1                                                         |
| • TA number & date of appraisal in the same cancer  | If it was recommended for other treatment lines in the same cancer category, record the TA number and the date of the FAD documents (MM/YYYY).                                                                                                                                                                                            | Narrative description of date                                                                                                  |
| Maturity of survival data in clinical trial         | The data maturity is examined by looking at the number of events (deaths) of intervention arm in clinical trials.                                                                                                                                                                                                                         | Direct quote from manufacturer submission                                                                                      |
| • Maturity (grade)                                  | The direct quotation will be classified into three groups following the data cut point, 20% and 50 % of the number of events.                                                                                                                                                                                                             | Immature (number of events < 20%) =1,<br>Relatively immature (20% ≤ number of                                                  |



|                              |                                                                                                                                                                                                                                                                                                                                      |                                      | events ≤50%)=2<br>Mature (number of events < 50%) =3                                                                                                                                                                                                                                                                                                             |
|------------------------------|--------------------------------------------------------------------------------------------------------------------------------------------------------------------------------------------------------------------------------------------------------------------------------------------------------------------------------------|--------------------------------------|------------------------------------------------------------------------------------------------------------------------------------------------------------------------------------------------------------------------------------------------------------------------------------------------------------------------------------------------------------------|
| Outcome variables            |                                                                                                                                                                                                                                                                                                                                      |                                      |                                                                                                                                                                                                                                                                                                                                                                  |
| Variable                     | Explanation                                                                                                                                                                                                                                                                                                                          | Coding                               | Example                                                                                                                                                                                                                                                                                                                                                          |
| characteristic of population | Whether RWD are used to determine the characteristic of population, including the initiation age and health performance status (ECOG) or not.<br>- Soft use: when RWD are supplementary evidence to decide the population characteristics<br>- Hard use: when RWD determine the characteristics of population in economic evaluation | No RWD = 0<br>Yes, data from RWD = 1 | - Pomalidomide, in combination with low-dose dexamethasone, for treating multiple myeloma in adults at third or subsequent relapse (NICE TA427): baseline patient characteristics were obtained from RWD collected from a hospital population since the majority of the trial populations were previously untreated, which was different from target population. |
| treatment sequence           | Whether RWD are used to determine the subsequent treatment option or not.<br>After the disease progression onto the later stages of cancer treatments, patients are likely to receive idiosyncratic subsequent treatments. The pattern of subsequent treatment for cost-effectiveness analysis could be observed by RCT or RWD.      | No RWD = 0<br>Yes, data from RWD = 1 | - Palbociclib with an aromatase inhibitor for previously untreated, hormone receptor-positive, HER2-negative, locally advanced or metastatic breast cancer (NICE TA495): a study of medical records was used to determine the treatment sequence.                                                                                                                |
| choice of comparator         | Whether RWD are used to choose the comparators in economic evaluation or not.<br>Although comparators are chosen based on the current clinical guideline, drug utilisation data or clinical expert opinion are frequently referred to find the most relevant comparators in evaluation.                                              | No RWD = 0<br>Yes, data from RWD = 1 | - Ixazomib with lenalidomide and dexamethasone for treating relapsed or refractory multiple myeloma (NICE TA505): the manufacturer considered that lenalidomide was appropriate comparator based on IMS market research data (lenalidomide, 69% market share and panobinostat, 7%).                                                                              |
| structure (health state)     | Whether RWD are used to determine the health state such as stable, progression, and death in a given model. Information is available at health state in the model of cost-effectiveness analysis in manufacturer submission documents.                                                                                               | No RWD = 0<br>Yes, data from RWD = 1 | - Palbociclib with an aromatase inhibitor for previously untreated, hormone receptor-positive, HER2-negative, locally advanced or metastatic breast cancer (NICE TA495): the model health state of post-progression was specified based on a retrospective patient medical record review study.                                                                  |
| structure (model cycle)      | Whether RWD are used to determine model cycle or not. Model cycle, hereby, means that the duration between different health states, which can be influenced by the severity of conditions.                                                                                                                                           | No RWD = 0<br>Yes, data from RWD = 1 | N/A **                                                                                                                                                                                                                                                                                                                                                           |
| Structure                    | Whether RWD are used to decide the survival                                                                                                                                                                                                                                                                                          | No RWD = 0                           | - Larotrectinib for treating advanced solid tumours with                                                                                                                                                                                                                                                                                                         |

|                                                     |                                                                                                                                                                                                                                                                                                                                                                                                                                                                                                                                                                                                                             |                                      |                                                                                                                                                                                                               |
|-----------------------------------------------------|-----------------------------------------------------------------------------------------------------------------------------------------------------------------------------------------------------------------------------------------------------------------------------------------------------------------------------------------------------------------------------------------------------------------------------------------------------------------------------------------------------------------------------------------------------------------------------------------------------------------------------|--------------------------------------|---------------------------------------------------------------------------------------------------------------------------------------------------------------------------------------------------------------|
| (survival distribution of intervention)             | <p>distribution of intervention or not.</p> <p>Since survival rate observed in RCTs is immature, it is necessary to extrapolate the survival rate for analysis. In order to choose proper survival distribution, the goodness of fit is tested (AIC, BIC). Also, the clinical plausibility is asked to validate the distribution. In this case, the alternative data can be utilized.</p> <p>- If RWD is utilised for choosing distribution, mark as "hard use".</p> <p>- If RWD is utilised as supplementary evidence for the chosen distribution, mark as "soft use".</p>                                                 | Yes, data from RWD = 1               | NTRK fusions (NICE TA630): UK all-cause mortality data were used to assess the clinical acceptability of distributions whether patient overall survival exceeded current UK life expectancy                   |
| Structure (survival distribution of comparator)     | <p>Whether RWD are used to decide the survival distribution of comparator or not.</p> <p>As survival distributions of intervention and comparators are separately determined, the extraction tool approach it independently. Apply the abovementioned description on survival distribution of intervention to comparator in this row.</p>                                                                                                                                                                                                                                                                                   | No RWD = 0<br>Yes, data from RWD = 1 |                                                                                                                                                                                                               |
| Structure (Time to discontinuation of intervention) | <p>Whether RWD are used to decide the time to discontinuation of intervention or not.</p> <p>The time to discontinuation is likely to be decided by 1) simply adopting discontinuation rule in trials, 2) formulating distribution of discontinuation, or 3) clinical experts' opinion.</p> <p>- If RWD are used for designating the time to discontinuation, mark as "hard use"</p> <p>- If RWD are used as supplementary evidence for designating the time to discontinuation, mark as "soft use".</p> <p>- If clinical experts' opinions are used for designating the time to discontinuation, it is not regarded as</p> | No RWD = 0<br>Yes, data from RWD = 1 | - Lorlatinib for previously treated ALK-positive advanced non-small-cell lung cancer (NICE TA628): The plausibility of the extrapolation of time on treatment was validated by UK RWD, hospital network data. |

|                                                      |                                                                                                                                                                                                                                                                                                  |                                      |                                                                                                                                                                                                                                                                               |
|------------------------------------------------------|--------------------------------------------------------------------------------------------------------------------------------------------------------------------------------------------------------------------------------------------------------------------------------------------------|--------------------------------------|-------------------------------------------------------------------------------------------------------------------------------------------------------------------------------------------------------------------------------------------------------------------------------|
|                                                      | RWD.                                                                                                                                                                                                                                                                                             |                                      |                                                                                                                                                                                                                                                                               |
| Structure<br>(time to discontinuation of comparator) | Whether RWD are used to decide the time to discontinuation of comparator or not.<br>Apply the above-mentioned description on time to discontinuation of intervention to comparator in this row.                                                                                                  | No RWD = 0<br>Yes, data from RWD = 1 |                                                                                                                                                                                                                                                                               |
| Clinical outcome (OS) intervention                   | Whether RWD give the figure for overall survival (OS) of intervention or not. In order to measure the Quality Adjusted Life-Years (QALYs), it is necessary to extrapolate overall survival based on observed data on survival. The survival data could come from RCT or RWD.                     | No RWD = 0<br>Yes, data from RWD = 1 | - Nivolumab for adjuvant treatment of completely resected melanoma with lymph node involvement or metastatic disease (NICE TA558): the survival model applied the registry data (American Joint Committee on Cancer; AJCC) to both treatment arms after a certain time point. |
| Clinical outcome (PFS) intervention                  | Whether RWD give the figure for progression free survival (PFS) of intervention or not. The progression of disease is important for economic evaluation model in terms of health state transitions and treatment switching. The survival data could come from RCT or RWD.                        | No RWD = 0<br>Yes, data from RWD = 1 | N/A**                                                                                                                                                                                                                                                                         |
| Clinical outcome (RR) intervention                   | Whether RWD provides the response rate (RR) for the intervention or not. The effectiveness of cancer treatment is often shown by responses of tumour cells, which is evaluated by the RECIST criteria or other criteria. The response rate data would be collected in RCT or other type of data. | No RWD = 0<br>Yes, data from RWD = 1 | N/A**                                                                                                                                                                                                                                                                         |
| Clinical outcome (TTP) intervention                  | Whether RWD give the figure for time-to-progression (TTP) of intervention or not. Some cancer treatments show their clinical effectiveness not through the progression free survival (PFS), but alternatively through time-to-progression.                                                       | No RWD = 0<br>Yes, data from RWD = 1 | N/A**                                                                                                                                                                                                                                                                         |
| Clinical outcome (AE) intervention                   | Whether RWD give the figure of adverse event (AE) of intervention or not. Adverse events are crucial information for the estimation of the QALYs. The adverse events are collected in RCT. However, RWD, including cohort studies, retrospective studies, or                                     | No RWD = 0<br>Yes, data from RWD = 1 | - Blinatumomab for treating acute lymphoblastic leukaemia in remission with minimal residual disease activity (NICE TA589): retrospective non-interventional cohort study collected from 2000 to 2017 was used to inform the clinical outcome of comparators as well as       |

|                                                     |                                                                                                                                                                                                                                                                                                                                                        |                                      |                                                                                                                                                                                                                                                                                                                                                 |
|-----------------------------------------------------|--------------------------------------------------------------------------------------------------------------------------------------------------------------------------------------------------------------------------------------------------------------------------------------------------------------------------------------------------------|--------------------------------------|-------------------------------------------------------------------------------------------------------------------------------------------------------------------------------------------------------------------------------------------------------------------------------------------------------------------------------------------------|
|                                                     | other type of studies, also provide the information of adverse events, which cannot be found in RCT.                                                                                                                                                                                                                                                   |                                      | adverse event.                                                                                                                                                                                                                                                                                                                                  |
| Clinical outcome comparators (OS)                   | Whether RWD give the figure of overall survival (OS) of comparators or not.                                                                                                                                                                                                                                                                            | No RWD = 0<br>Yes, data from RWD = 1 | Refer to the variable, clinical outcome (OS) intervention                                                                                                                                                                                                                                                                                       |
| Clinical outcome comparators (PFS)                  | Whether RWD give the figure for the progression free survival (PFS) of comparators or not.                                                                                                                                                                                                                                                             | No RWD = 0<br>Yes, data from RWD = 1 | N/A**                                                                                                                                                                                                                                                                                                                                           |
| Clinical outcome comparators (RR)                   | Whether RWD provide the response rate (RR) of comparators or not.                                                                                                                                                                                                                                                                                      | No RWD = 0<br>Yes, data from RWD = 1 | N/A**                                                                                                                                                                                                                                                                                                                                           |
| Clinical outcome comparators (TTP)                  | Whether RWD provide the time-to-progression (TTP) of comparators or not.                                                                                                                                                                                                                                                                               | No RWD = 0<br>Yes, data from RWD = 1 | N/A**                                                                                                                                                                                                                                                                                                                                           |
| Clinical outcome comparators (AE)                   | Whether RWD provide the figure adverse events (AE) for the comparators or not.                                                                                                                                                                                                                                                                         | No RWD = 0<br>Yes, data from RWD = 1 | Refer to the variable, clinical outcome (AE) intervention                                                                                                                                                                                                                                                                                       |
| Transition probability                              | Whether RWD provide the transition probability from one state to other state, if it is applicable.                                                                                                                                                                                                                                                     | No RWD = 0<br>Yes, data from RWD = 1 | - Pembrolizumab for treating melanoma with high risk of recurrence (NICE TA553): electronic health records (Flatiron database) collected by cancer care providers in the US was used to model transition from the "locoregional recurrence (LR)" state to the "distant metastases" and life tables for transition from the LR to "death" state. |
| Health utility of health state (generic)            | Whether health state utility survey of generic measurement is done in RWD or RCT. Health state utility is necessary information for the estimation of the QALYs. Generic health utility measurement, EQ-5D, is frequently used. There is national tariff of EQ-5D to get the scores. Hereby, the way of collecting survey (RWD or RCT) is highlighted. | No RWD = 0<br>Yes, data from RWD = 1 | N/A**                                                                                                                                                                                                                                                                                                                                           |
| Health utility of health state (condition-specific) | Whether health state utility survey of condition-specific measurement is done in RWD or RCT. In cancer treatment, condition-specific measurement is commonly adopted. Similar to the previous row, the way of collecting survey (RWD or RCT) is highlighted.                                                                                           | No RWD = 0<br>Yes, data from RWD = 1 | N/A**                                                                                                                                                                                                                                                                                                                                           |

|                                                 |                                                                                                                                                                                                                                                                                                                                                                            |                                      |                                                                                                                                                                                                                                                                                                                                                                                                          |
|-------------------------------------------------|----------------------------------------------------------------------------------------------------------------------------------------------------------------------------------------------------------------------------------------------------------------------------------------------------------------------------------------------------------------------------|--------------------------------------|----------------------------------------------------------------------------------------------------------------------------------------------------------------------------------------------------------------------------------------------------------------------------------------------------------------------------------------------------------------------------------------------------------|
| Disutility of adverse events                    | Whether survey of collecting disutility data is done in RWD or RCT. As adverse events are likely to reduce the patient's quality of life, the disutility of adverse events is included in estimates. The way of collecting survey (RWD or RCT) is drawn to attention.                                                                                                      | No RWD = 0<br>Yes, data from RWD = 1 | N/A**                                                                                                                                                                                                                                                                                                                                                                                                    |
| Resource use (Health state cost) common         | Whether resource use for estimating health state cost is derived from RWD or RCT. In economic evaluation, the unit cost mostly comes from the national reference cost. The total cost is calculated by the total resource use (volume of technology and health care services) multiplied by the reference cost. Here, the only resource use is focused in data extraction. | No RWD = 0<br>Yes, data from RWD = 1 | - Axicabtagene ciloleucel for treating diffuse large B-cell lymphoma and primary mediastinal large B-cell lymphoma after 2 or more systemic therapies (NICE TA559): RWD was used for estimating the cost of inpatient admission (data: Hospital Episode Statistics), the cost of home care and hospice (data: National Audit Office), and GP time (data: Personal Social Services Research Unit; PSSRU). |
| Resource use (end-of-life care) common          | Whether resource use for estimating end-of-life care is derived from RWD or RCT. Resource use of terminal cancer patients is not frequently reported in the RCT providing the treatment effect. Therefore, other data resources, including RCTs of other technologies, provide the information of resource use in the end-of-life care.                                    | No RWD = 0<br>Yes, data from RWD = 1 | N/A**                                                                                                                                                                                                                                                                                                                                                                                                    |
| Resource use (Managing AE) intervention         | Whether resource use for managing adverse events of intervention is derived from RWD or RCT. Resource use of managing adverse events is reported in RCTs as well as in other types of researches which can provide alternative perspectives.                                                                                                                               | No RWD = 0<br>Yes, data from RWD = 1 | N/A**                                                                                                                                                                                                                                                                                                                                                                                                    |
| Resource use (volume of treatment) intervention | Whether resource use for volume of treatment of intervention is derived from RWD or RCT. In this study, scope of the volume of treatment is limited to the frequency of treatment, frequency of administration, and market share.                                                                                                                                          | No RWD = 0<br>Yes, data from RWD = 1 | - Fulvestrant for treating untreated locally advanced or metastatic oestrogen-receptor positive breast cancer (NICE TA503): a medical chart review study was used to determine the proportion of patient using subsequent treatment for cost calculation.                                                                                                                                                |
| Resource use (Dose adjustment) intervention     | Whether resource use for dose adjustment of intervention is derived from RWD or RCT. There are several reasons for adjusting dose such as adverse events (AEs). The dose of cancer treatments is calculated by BSA (body surface area). This study focuses only on BSA and dose adjustment due to AEs,                                                                     | No RWD = 0<br>Yes, data from RWD = 1 | N/A**                                                                                                                                                                                                                                                                                                                                                                                                    |

|                                                                                                                                                                                                                             |                                                                                                                                                                                                                                                                                                                                                        |                                      |                                                                        |
|-----------------------------------------------------------------------------------------------------------------------------------------------------------------------------------------------------------------------------|--------------------------------------------------------------------------------------------------------------------------------------------------------------------------------------------------------------------------------------------------------------------------------------------------------------------------------------------------------|--------------------------------------|------------------------------------------------------------------------|
|                                                                                                                                                                                                                             | because these information are commonly reported in NICE appraisals.                                                                                                                                                                                                                                                                                    |                                      |                                                                        |
| Resource use (Managing AE) comparators                                                                                                                                                                                      | Whether resource use for managing adverse events of comparators is derived from RWD or RCT.                                                                                                                                                                                                                                                            | No RWD = 0<br>Yes, data from RWD = 1 | N/A**                                                                  |
| Resource use (volume of treatment) comparators                                                                                                                                                                              | Whether resource use for volume of treatment of comparators is derived from RWD or RCT.                                                                                                                                                                                                                                                                | No RWD = 0<br>Yes, data from RWD = 1 | Refer to the variable, resource use (volume of treatment) intervention |
| Resource use (Dose adjustment) comparators                                                                                                                                                                                  | Whether resource use for dose adjustment of comparators is derived from RWD or RCT.<br>Since the intervention is a novel technology, RCTs provide less information on the adjustment. RWD could be utilised to provide more relevant information regarding dose adjustment of existing technologies which have been used in routine clinical practice. | No RWD = 0<br>Yes, data from RWD = 1 | N/A**                                                                  |
| * In order to detect the use of RWD in sensitivity analysis, the parametric part is duplicated.<br>** As data extraction is not conducted, all of examples are not available at this stage. In this case, it marked as N/A. |                                                                                                                                                                                                                                                                                                                                                        |                                      |                                                                        |

1  
2  
3  
4  
5  
6  
7  
8  
9  
10  
11  
12  
13  
14  
15  
16  
17  
18  
19  
20  
21  
22  
23  
24  
25  
26  
27  
28  
29  
30  
31  
32  
33  
34  
35  
36  
37  
38  
39  
40  
41  
42  
43  
44  
45  
46

For peer review only

# BMJ Open

## A protocol for data extraction: how real-world data have been used in NICE appraisals of cancer therapy

|                                 |                                                                                                                                                                                                                                                                         |
|---------------------------------|-------------------------------------------------------------------------------------------------------------------------------------------------------------------------------------------------------------------------------------------------------------------------|
| Journal:                        | <i>BMJ Open</i>                                                                                                                                                                                                                                                         |
| Manuscript ID                   | bmjopen-2021-055985.R1                                                                                                                                                                                                                                                  |
| Article Type:                   | Protocol                                                                                                                                                                                                                                                                |
| Date Submitted by the Author:   | 04-Nov-2021                                                                                                                                                                                                                                                             |
| Complete List of Authors:       | Kang, Jiyeon; London School of Hygiene and Tropical Medicine Faculty of Public Health and Policy, Department of Health Services Research and Policy;<br>Cairns, John; London School of Hygiene and Tropical Medicine, Department of Health Services Research and Policy |
| <b>Primary Subject Heading</b>: | Health economics                                                                                                                                                                                                                                                        |
| Secondary Subject Heading:      | Health economics                                                                                                                                                                                                                                                        |
| Keywords:                       | ONCOLOGY, HEALTH ECONOMICS, HEALTH SERVICES ADMINISTRATION & MANAGEMENT                                                                                                                                                                                                 |
|                                 |                                                                                                                                                                                                                                                                         |

SCHOLARONE™  
Manuscripts



1  
2  
3  
4 **A protocol for data extraction: how real-world data have been used in NICE appraisals of**  
5  
6  
7 **cancer therapy**

8  
9 Jiyeon Kang<sup>1</sup>, John Cairns<sup>1</sup>

10  
11  
12 <sup>1</sup>Department of Health Service Research and Policy,

13  
14 Faculty of Public Health and Policy,

15  
16  
17 London School of Hygiene and Tropical Medicine, London, UK

18  
19  
20 Corresponding author: Jiyeon Kang ([Jiyeon.Kang@lshtm.ac.uk](mailto:Jiyeon.Kang@lshtm.ac.uk))

21  
22  
23 15-17 Tavistock place, London, WC1H 9SH, UK

24  
25  
26 Word count: 4,603

27  
28  
29 Keywords: Real-world data (RWD), Health Technology assessment (HTA), economic  
30  
31  
32 evaluation, oncology medicine, National Institute for Health and Care Excellence (NICE)

33  
34  
35  
36  
37  
38 **ABSTRACT**

39  
40  
41 **Introduction**

42  
43  
44 Due to the limitations of relying on randomised controlled trials, the potential benefits of real-  
45  
46  
47 world data (RWD) in enriching evidence for health technology assessment (HTA) are  
48  
49  
50 highlighted. Despite increased interest in RWD, there is limited systematic research  
51  
52  
53 investigating how RWD has been used in HTA. The main purpose of this protocol is to extract  
54  
55  
56 relevant data from National Institute for Health and Care Excellence (NICE) appraisals in a  
57  
58  
59 transparent and reproducible manner in order to determine how NICE has incorporated a  
60  
broader range of evidence in the appraisal of oncology medicines.

## Methods and analysis

The appraisals issued between January 2011 to May 2021 are included following inclusion criteria. The data extraction tool newly developed for this research includes the critical components of economic evaluation. The information is extracted from identified appraisals in accordance with extraction rules. The data extraction tool will be validated by a second researcher independently. The extracted data will be analysed quantitatively to investigate to what extent RWD has been used in appraisals. This is the first protocol to enable data to be extracted comprehensively and systematically in order to review the use of RWD.

## Ethics and dissemination

This study is approved by the Ethics Committee of the London School of Hygiene and Tropical Medicine on 14 November 2019 (17315). Results will be published in peer-reviewed journals.

## STRENGTHS AND LIMITATIONS OF THIS STUDY

### Strengths

- This protocol enables data to be extracted in a transparent and systematic manner for the study of how RWD has been used in NICE appraisals.
- It includes all the different ways an economic evaluation might use RWD.
- This study facilitates systematic understanding of the use of RWD in NICE appraisals over the last 10 years.

### Limitations

1  
2  
3  
4 - Since it is focussed on cancer, the methods and eventually the findings are to some extent  
5  
6 cancer-specific.  
7

8  
9  
10 - The protocol could be modified to reflect the HTA context in different countries although  
11  
12 the extraction protocol is not fully applicable to the practice of other HTA bodies as much of  
13  
14 the protocol reflects the NICE appraisal process.  
15  
16

## 17 18 19 20 21 **INTRODUCTION** 22

23  
24 In the last few years, interest in real-world data (RWD) has grown in health care decision-  
25  
26 making (1). Health Technology Assessment (HTA) refers to the systematic evaluation of  
27  
28 clinical- and cost-effectiveness of health technology (2,3). It requires valid and reliable  
29  
30 information for the evaluation. Randomised controlled trials (RCTs) have mainly provided the  
31  
32 information (4). However, it is challenging to meet all information needs from RCTs since the  
33  
34 new generation of therapies pose several assessment challenges. For example, when  
35  
36 treatment options are expanding rapidly, it is increasingly unlikely that there are RCTs  
37  
38 featuring all the relevant comparators. Furthermore, the traditional design of RCTs is possibly  
39  
40 less appropriate for new technologies such as those targeting rare genetic mutations that it  
41  
42 is difficult to obtain enough size of clinically relevant study population (5). Moreover, RCTs  
43  
44 tend to include strictly controlled populations. Restricted population makes replication of  
45  
46 finding challenging (6). Another barrier to obtaining all the relevant information for HTA from  
47  
48 RCTs concerns the extrapolation of survival. RCTs observe the clinical outcome for a certain  
49  
50 period. Extrapolation is required in order to incorporate the survival data from RCTs in the  
51  
52 health economic model (7). It is more challenging to identify the most appropriate  
53  
54  
55  
56  
57  
58  
59  
60

1  
2  
3  
4 extrapolation the shorter the duration of the trial. If survival data from RCTs are based on a  
5  
6 very limited observation period, the extrapolation of the survival curve is likely to fail to  
7  
8 predict the long-term effect (8).  
9

10  
11  
12 The potential benefits of RWD in enriching evidence for HTA are highlighted by the limitations  
13  
14 of relying on RCTs (9). This research focuses on the use of RWD in HTA by the National Institute  
15  
16 for Health and Care Excellence (NICE). NICE has achieved an international reputation for  
17  
18 rigorous development and application of scientific methods to appraise new health  
19  
20 technologies to provide its decisions with robust and fair justification (10). More importantly,  
21  
22 NICE is noted for the transparency of its processes, responsiveness to change, and  
23  
24 commitment to using the best available evidence (11). The evidence is structurally well-  
25  
26 documented enough to find the key information and is available on the NICE website.  
27  
28 Therefore, review of these appraisals can provide comprehensive information on the  
29  
30 evidence used for decision-making. In April 2020, NICE signalled its intention to integrate  
31  
32 broader types of data in developing NICE guidance (12). Although it is primarily a statement  
33  
34 of intent, it is not a new development in NICE practice since NICE already incorporates a  
35  
36 diverse range of published scientific evidence when developing its guidance on health  
37  
38 technologies. For example, UK audit data (TA255, 2012), Hospital Episode Statistics (TA559,  
39  
40 2018) and registry data such as the Edinburgh Ovarian Cancer Database (TA598, 2019),  
41  
42 Surveillance, Epidemiology, and End Result program (TA562, 2019) have been used in the  
43  
44 development of NICE technology appraisal (TA) guidance. While a wide range of data are  
45  
46 already used in NICE guidance, there is limited understanding regarding how and where RWD  
47  
48 has been used, and in which circumstances RWD is accepted as relevant. Research is required  
49  
50 to investigate systematically patterns in the use of RWD and to understand the driving forces  
51  
52  
53  
54  
55  
56  
57  
58  
59  
60

1  
2  
3  
4 behind its use in NICE appraisals.  
5

6  
7 Several researchers have reviewed practice across HTA bodies (13,14) or reported the use of  
8  
9 RWD in HTA (15). However, little systematic research has been conducted. Important  
10  
11 information is missing such as how they included literatures without selection bias, which  
12  
13 parts of evidence were reviewed, whether they have clearly defined RWD and justified or  
14  
15 explained why this definition is relevant and how different HTA systems were compared given  
16  
17 their different practices. Roberts et al. addressed the potential role of RWD in bridging the  
18  
19 evidence gaps (16). However, they illustrate the use of RWD with a few examples, rather than  
20  
21 providing a fuller picture of current practice when using RWD. Bullement et al. recently  
22  
23 reviewed how RWD informed single technology appraisals of cancer drugs in NICE (17).  
24  
25 Although this study follows a more systematic approach to the review of the use of RWD, a  
26  
27 data extraction table was not provided and the authors focused only on how RWE influenced  
28  
29 the cost-effectiveness analysis, and not on how RWE was used to support or establish the  
30  
31 appraisal. Due to limited information presented concerning the review process in this study,  
32  
33 it is unclear whether the information presented provides a full picture of the use of RWD.  
34  
35 Bullement et al. included 113 STAs issued between April 2011 and October 2018. As interest  
36  
37 in RWD is increasing over time, it may miss relevant information from recent years. Therefore,  
38  
39 the careful development of this extraction protocol is required to help extract the data  
40  
41 systematically from appraisals, increase the reliability of the results of the analysis and permit  
42  
43 a more detailed description of the use of RWD and analysis of factors influencing its use.  
44  
45  
46  
47  
48  
49  
50  
51  
52

53  
54 A protocol is required to ensure the consistency of data extraction so that the risk of  
55  
56 unsystematic data collection is reduced. The main purpose of this protocol is to extract data  
57  
58 from NICE appraisals in a transparent and reproducible manner to answer, "how has NICE  
59  
60

1  
2  
3  
4 incorporated a broad range of evidence in the appraisal of oncology medicines.” Without  
5  
6 proper justification and operational rules, the data are likely to be collected erroneously, with  
7  
8 a risk of biasing the analysis. The extracted data are expected to be objective and less biased.  
9  
10 With such data, the analysis can provide more robust answers to questions regarding how  
11  
12 RWD has been used in NICE technology appraisals. Furthermore, this protocol facilitates the  
13  
14 development of a rich dataset which can highlight not just where RWD has been used but also  
15  
16 what types of evidence have been used in the HTA process in line with NICE’s interest in  
17  
18 incorporating a broad range of evidence. The data can be analysed to answer the research  
19  
20 questions including “how has RWD been used in NICE appraisals” and “which factors are  
21  
22 associated with increased likelihood of the use of RWD” in depth.  
23  
24  
25  
26  
27  
28  
29  
30  
31

## 32 **METHODS AND ANALYSIS**

33  
34  
35 NICE appraisal documents are identified following inclusion criteria (figure 1). The information  
36  
37 is extracted from identified appraisals in accordance with extraction rules. The detailed  
38  
39 extraction rules can be found in supplement 1. The extraction tool includes evidence-related  
40  
41 information such as characteristics of the main clinical evidence and the economic evaluation  
42  
43 model and other information. Following the tool, the information about in which part of cost-  
44  
45 effectiveness analysis RWD was used is collected. Intensity analysis of the use of RWD and  
46  
47 regression analysis are planned. The data extraction is planned from January 2020 to October  
48  
49  
50  
51  
52 2021.  
53  
54  
55  
56  
57

## 58 **Definition of RWD**

1  
2  
3  
4 Before extracting information about the use of RWD in NICE technology appraisals, a  
5  
6 definition of RWD is clearly required. RWD is an umbrella term which covers broad categories  
7  
8 of data. Although RWD is increasingly addressed in the literature, there is no consensus over  
9  
10 the definition. One of the commonly used definitions of RWD is that of the US Food and Drug  
11  
12 Administration (FDA)(18). Another widely cited study regarding the definition of RWD is  
13  
14 Makady et al. (1). Each definition has relatively large operational flexibility to be used for data  
15  
16 extraction. For example, companies sometimes present phase 1 clinical trial as RWD.  
17  
18 However, these data hardly provide insights in the discussion of the use of RWD in HTA. One  
19  
20 of the plausible ways to include right data for the relevant review is to restrict the range of  
21  
22 RWD by merging two definitions from FDA and Makady et al. Requiring data to meet both  
23  
24 definitions can help to reduce the discretionary interpretation of RWD. Hence, this study uses  
25  
26 a definition combining a category of the study designs of collecting RWD explored by Makady  
27  
28 and his colleagues' study and the FDA's definition of RWD focusing on routinely collected data.  
29  
30 In this research, RWD is defined as the data relating to patient health status and/or the  
31  
32 delivery of health care routinely collected from non-experimental settings.  
33  
34  
35  
36  
37  
38  
39  
40  
41  
42  
43  
44

### 45 **Step 1 Appraisal selection**

46  
47 The first step of the research identifies the NICE TA guidance which meets the eligibility  
48  
49 criteria. TA guidance are publicly available on the NICE website ([www.nice.org.uk](http://www.nice.org.uk)). Appraisal  
50  
51 documents are available for each appraisal. Among the documents, this study only reviews  
52  
53 four type of appraisal documents, the final scope, the manufacturer's submission, the  
54  
55 evidence review group (ERG) report, and the final appraisal determination. These documents  
56  
57 are reviewed to establish whether RWD is used to determine any components of the  
58  
59  
60

1  
2  
3  
4 economic evaluation.  
5  
6

#### 7 Data sources 8 9

10 This research exclusively includes single-technology appraisals (STA) of oncology medicines.  
11 Figure 1 shows the inclusion and exclusion criteria. One aim is to understand how and where  
12 RWD has been used in the appraisal process. Therefore, it is necessary that the appraisal  
13 process should be identical. However, the STA and multiple technology appraisal (MTA)  
14 processes differ substantially. The MTA has different format of appraisal documents to assess  
15 several drugs or treatments used for one or more condition. It is challenging to gather same  
16 information in the MTA process as different actors have the principal responsibility for  
17 producing the main evidence in each process (19). Besides, STAs are the predominant form in  
18 practice, 93% of appraisals of oncology. The small number of the MTAs, only eighteen  
19 oncology appraisals, limits the scope for such a comparison. Therefore, this study focuses on  
20 STAs, which assess a single treatment. It also limits analysis to appraisals published between  
21 January 2011 and May 2021 in order to have a long enough time period to capture potential  
22 changes over time in how RWD has been used but also recognising that STAs from earlier  
23 years might be of less interest because enthusiasm for RWD was largely absent. Here, the  
24 date when guidance was published refers to the date of issuing the final appraisal  
25 determination document (FAD) which can be regarded as an end point of the evidence  
26 synthesis process (in the absence of a successful appeal).  
27  
28  
29  
30  
31  
32  
33  
34  
35  
36  
37  
38  
39  
40  
41  
42  
43  
44  
45  
46  
47  
48  
49  
50

#### 51 Operational separation 52 53 54

55 Following the inclusion and exclusion criteria, appraisals are identified. Among these  
56  
57  
58  
59  
60



1  
2  
3  
4 appraisals, some TAs have more than one clinical indication or combination therapy. It is  
5  
6 possible that different evidence was used for the different patient populations in the  
7  
8 appraisal. Hence, these appraisals are separated by clinical conditions or treatment lines and  
9  
10 reviewed in order to avoid losing information. For example, olaparib for maintenance  
11  
12 treatment of relapsed platinum-sensitive ovarian, fallopian tube or peritoneal cancer (NICE  
13  
14 TA620) has two separate recommendations for different conditions. While a patient who has  
15  
16 a BRCA1 or BRCA2 mutation and has had three or more courses of platinum-based  
17  
18 chemotherapy is eligible for the treatment, a patient who has a BRCA1 or BRCA2 mutation  
19  
20 and has had two courses of platinum-based chemotherapy is able to use the treatment within  
21  
22 Cancer Drug Fund. Consequently, these indications are included separately in the analysis.  
23  
24  
25  
26  
27  
28  
29  
30  
31

## 32 **Step 2: Data extraction**

33  
34 A detailed protocol is developed to guide the extraction of essential data for each appraisal  
35  
36 in order to investigate the use of RWD in NICE technology appraisals in a systematic and  
37  
38 reproducible manner. The protocol is designed to extract information from both the  
39  
40 manufacturer's submission (manufacturer's cost-effectiveness analysis) and the final  
41  
42 appraisal document (the model preferred by the committee) regarding where RWD was used,  
43  
44 and to determine the extent to which the committee supported the use of RWD in these  
45  
46 appraisals and understand what factors are associated with supporting or not supporting the  
47  
48 use. Figure 2 shows the structure of the data extraction template. In summary, the extraction  
49  
50 tool consists of three parts – general information, explanatory variables, and outcome  
51  
52 variables. The outcome of interest being the use of RWD. The outcome variables record use  
53  
54 or non-use of RWD for different elements of the economic evaluation. The information in  
55  
56  
57  
58  
59  
60

1  
2  
3  
4 base-case analysis and sensitivity analysis will separately extracted. The tool extensively  
5  
6 includes important elements of an economic evaluation. The study will analyse the data to  
7  
8 investigate patterns in the use of RWD in NICE appraisals, and the association between several  
9  
10 factors and the use of RWD. Explanatory variables are suggested based on the hypotheses  
11  
12 presented under Step 4: data analysis. All items in the extraction template and how to code  
13  
14 them are described in the glossary (supplement 1). To convey the type of information to be  
15  
16 extracted, some examples from a preparatory review are presented in the glossary.  
17  
18  
19  
20  
21  
22  
23  
24

#### 25 Parametric and non-parametric use

26  
27  
28 This protocol distinguishes two categories of outcome variable, parametric and non-  
29  
30 parametric use of RWD. Parametric use of RWD is the use of such data to define the numerical  
31  
32 value of a specific variable in the economic evaluation, whereas non-parametric use is where  
33  
34 data are utilised to develop the model structure or to determine the scope of the evaluation.  
35  
36 For example, when RWD are used to estimate survival, this will be counted as parametric use  
37  
38 with respect to clinical outcome (OS/PFS). Parametric use is reviewed and recorded for the  
39  
40 intervention and comparators separately as different data could be used in the cost-  
41  
42 effectiveness analysis. An example of non-parametric use of RWD can be found in the  
43  
44 appraisal of palbociclib for previously untreated, hormone receptor-positive, HER2-negative,  
45  
46 locally advanced or metastatic breast cancer (NICE TA495). In this appraisal, the company  
47  
48 used information from a study of medical records to determine the subsequent treatments  
49  
50 to be assumed in the economic model. This case is regarded as non-parametric use since RWD  
51  
52 was used to specify the treatment sequence but not the quantity and cost of subsequent  
53  
54 treatment.  
55  
56  
57  
58  
59  
60

1  
2  
3  
4 Parametric and non-parametric use of RWD and the different categories shown in figure 2,  
5  
6 facilitate more consistent data extraction by highlighting the different ways RWD might be  
7  
8 used, and provide greater flexibility to the testing of hypotheses regarding use of RWD, and  
9  
10 the exploration of ways to measure the intensity of use of RWD.  
11  
12  
13

#### 14 Coding

15  
16  
17 A key issue with respect to improving the reliability of data extraction is how many distinct  
18  
19 variables are identified and how finely divided are the potential responses to the variables in  
20  
21 the extraction template. There are two options, in order not to lose information, have many  
22  
23 distinct variables with binary responses, or merge many variables but have multi-level  
24  
25 responses. This coding system has advantages which include avoiding information loss, and  
26  
27 also grouping 'similar' information used during appraisals to establish patterns of the use of  
28  
29 RWD. It is closely linked to how far should it break down the levels of each coding. In an effort  
30  
31 to sophisticatedly divide variables, the template took an "including all and combining trivia"  
32  
33 approach. It helps to include all relevant variables where potentially data can be used, but  
34  
35 also to list variables more concisely by merging unnecessarily trivial variables so that the  
36  
37 outcome of the extraction can be concretely analysed. Based on two categories, the  
38  
39 parametric and non-parametric use of RWD, the areas where data are likely to be used are  
40  
41 carefully searched. As a backbone of the extraction structure, dividing two categories helped  
42  
43 to search the component systematically. Under parametric use, clinical effectiveness, health  
44  
45 utility and cost and healthcare resource use were thoroughly reviewed. After sorting variables,  
46  
47 they were aggregated if the information is minor and can be categorised into one variable.  
48  
49 The areas where aggregation is mostly required are resource use in economic evaluation. In  
50  
51 order to reflect the current practice, especially cost part has naturally incorporated RWD into  
52  
53  
54  
55  
56  
57  
58  
59  
60

1  
2  
3  
4 the analysis. It is less informative to collapse the variables in resource use since the use of  
5  
6 RWD in cost part is already expected. Also, different health technology can include different  
7  
8 resource use reflecting its characteristics. Counting every cost part is not an accurate way to  
9  
10 understand why and how RWD was used. Hence, the variable, resource use is not  
11  
12 differentiated. However, variables such as volume of treatment or dose adjustment are  
13  
14 separated from resource use as these data have potentially critical impacts on the result of  
15  
16 economic evaluation.  
17  
18  
19  
20  
21

### 22 **Step 3: Validation of data extraction tool**

23  
24  
25 The data extraction tool will be validated by a second researcher independently repeating the  
26  
27 data extraction for a random sample of appraisals (20% of all appraisals). This validation is  
28  
29 required to check the replicability of the data extraction and the clarity of the extraction tool.  
30  
31 Any disagreements between the researchers will be resolved by discussion. Peer discussion  
32  
33 following the validation process is important not only to check the clarity of this protocol but  
34  
35 also to investigate any deviations caused by unclear information. It will help pinpoint where  
36  
37 a higher degree of subjectivity may arise in the data extraction.  
38  
39  
40  
41  
42

### 43 **Step 4: Data analysis**

44  
45  
46 The extracted data will be analysed quantitatively in two different ways. First, a descriptive  
47  
48 analysis will summarise where and how RWD has been used in appraisals. This will be  
49  
50 supplemented by an analysis of the intensity of use of RWD in order to explore changes in the  
51  
52 pattern of use of RWD over time and differences with respect to cancer type. In addition to  
53  
54 descriptive statistics, the association between years and the intensity of use of RWD will be  
55  
56 examined. Secondly, a regression analysis will be performed to investigate which factors are  
57  
58  
59  
60

1  
2  
3  
4 associated with the greater use of RWD in a company's submission. A part of the protocol  
5  
6 development, appraisal documents were reviewed to identify factors potentially associated  
7  
8 with the use of RWD. Five factors were identified and formulated into hypotheses about  
9  
10 increased use of RWD (Figure 3).  
11  
12  
13  
14  
15  
16  
17

### 18 **Methodological issues**

19  
20  
21 The design of this data extraction protocol, in which information is reliably and repeatedly  
22  
23 extracted across appraisals, will allow us to review evidence for the use of RWD more  
24  
25 systematically than could be obtained from a number of case studies. However, several  
26  
27 methodological challenges can be anticipated. This section addresses these challenges and  
28  
29 how they might be mitigated.  
30  
31  
32  
33

#### 34 Issue 1: Unclearly stated information

35  
36  
37 Overall, NICE appraisals clearly describe the data used in the evidence synthesis. However, in  
38  
39 few cases, a result of systematic research is listed without clarification that the study is  
40  
41 included in evidence synthesis. In appraisals, systematic literature review is carried out to  
42  
43 identify all relevant evidence. Clinical effectiveness evidence is carefully examined and  
44  
45 described in detail, with clear reasons for the inclusion and exclusion of studies. On the other  
46  
47 hand, the systematic search for resource use and cost information usually enumerates  
48  
49 miscellaneous studies with bibliographic information and a summary, but the critical review  
50  
51 of minor components of health cost is sometimes missing. While a manufacturer provides the  
52  
53 result of the assessment, it is possible that some manufacturers' submissions do not clearly  
54  
55 state whether a particular study is used to determine which elements of resource use made  
56  
57  
58  
59  
60

1  
2  
3  
4 up the health state costs. However, it appears to be rare for there not be an explicit statement  
5  
6 regarding the evidence used, mostly with respect to resource use.  
7  
8  
9

#### 10 Issue 2: Level of aggregation

11

12  
13 An important question is the most appropriate level of aggregation. This is best illustrated  
14  
15 with respect to healthcare costs. It would be possible to have a variable indicating use or non-  
16  
17 use of RWD for every single element of cost (distinguishing GP visits, frequency of  
18  
19 hospitalization, and so on). At the opposite extreme there could be a single cost variable  
20  
21 which indicated whether RWD was used for any element of cost. The more aggregated the  
22  
23 measure the greater the loss of information, but some elements of cost are much more  
24  
25 important than others and the potential analyses of the use of RWD will multiply greatly if  
26  
27 there is no attempt at aggregation. The current protocol tries to balance the advantages and  
28  
29 disadvantages of different levels of aggregation by combining several elements into a health  
30  
31 state cost variable but distinguishing other important components of cost such as, such as  
32  
33 volume of treatment, dose adjustment and resource use for adverse events.  
34  
35  
36  
37  
38  
39

#### 40 Issue 3: No consensus on the definition of RWD.

41

42  
43 This research uses the definition of RWD merging definitions by FDA and Makady et al. The  
44  
45 distinctive part of the definition used in this research is 'routinely collected' data from 'non-  
46  
47 experimental study'. Although the definition provides specific and clear definition for this  
48  
49 research, there is no consensus as how best to define RWD. Even same definition can be  
50  
51 interpreted in a different way. For example, some researchers interpret that 'routinely  
52  
53 collected' in FDA definition is 'collected in routine care' whereas other interpret it as 'how  
54  
55 frequently data are collected.' It is likely that other definitions of RWD are preferred by other  
56  
57  
58  
59  
60

1  
2  
3  
4 researchers and the data extracted will be influenced by the definition of RWD chosen. It was  
5  
6 considered to use multiple definitions of RWD. However, this research does not work with  
7  
8 several definitions due to practical problems such as that they multiply the number of  
9  
10 potential analyses and make data extraction take longer. Although the definition can be  
11  
12 questioned by other researchers who have different views, the various definitions overlap  
13  
14 considerably. It is thus unlikely there will be a marked divergence in the data extracted when  
15  
16 using the different definitions.  
17  
18  
19  
20  
21

## 22 Design to mitigate methodological issues

23  
24  
25 Several operational rules are designed to minimise bias likely to come from the  
26  
27 methodological issues encountered in the data extraction. First, 'Unclear' is recorded  
28  
29 separately in order to provide a more accurate description of the use of RWD. However, for  
30  
31 purposes of data analysis, we anticipate treating these instance as "no RWD" since the code  
32  
33 'not clear' cannot be independently analysed. In addition, having a 'not clear' category in  
34  
35 analysis is unlikely to improve data quality since this problem appears to arise in very few  
36  
37 appraisals. Also, the information which is not clearly recorded in the appraisal documents is  
38  
39 usually not major information with respect to the evidence synthesis. It is also closely linked  
40  
41 to the reason for using binary code for analysis in this research. Decomposing levels of codes  
42  
43 into several small parts can help to extract the information as it is. However, it is more likely  
44  
45 to increase the complexity since trivial information is individually recorded. The extracted  
46  
47 trivial data should be interpreted based on another operational rule. It is subject to increased  
48  
49 error, particularly when testing hypotheses. For these reasons, the benefit of breaking up the  
50  
51 level of codes into multilevel does not outweigh the benefit of binary codes while separation  
52  
53 is much more time consuming. Instead of adapting multilevel codes, this study suggests an  
54  
55  
56  
57  
58  
59  
60

1  
2  
3  
4 alternative, an intensity analysis which helps to understand valid difference within diverse  
5  
6 patterns of the use of RWD. When looking at the pattern of the use of RWD, the intensity of  
7  
8 the use of RWD will be analysed. Simply counting the number of times RWD is used is not an  
9  
10 accurate way to understand why and how RWD was used. Alternatively, this study focuses on  
11  
12 variables which are more critically reviewed in appraisal. Variables such as survival outcome,  
13  
14 volume of treatment and choice of comparators are more likely to influence estimated cost-  
15  
16 effectiveness. Especially, the survival outcome is the most important information in both  
17  
18 clinical and cost-effectiveness as well as one of the controversial areas where to use RWD.  
19  
20 The intensity analysis is a framework to show whether RWD is used in these components  
21  
22 alongside the quantity of the use of RWD. It can offer more benefits in deeper understanding  
23  
24 of the use of RWD than counting all miscellaneous uses of RWD.  
25  
26  
27  
28  
29  
30  
31  
32  
33  
34

### 35 **STRENGTHS AND LIMITATIONS**

36  
37  
38 To the best of the authors' knowledge, this is the first study protocol to investigate to what  
39  
40 extent RWD has been used in NICE appraisals. It allows the practice of extracting information  
41  
42 to be reproducible, systematic and transparent. Strengthening the reproducibility and  
43  
44 transparency of extracting process can maximise the understanding of the use of RWD by  
45  
46 allowing more accurate interpretation and use of their findings. This protocol could be  
47  
48 relevant to researchers or HTA agencies who aim to understand how various data resource  
49  
50 was used in HTA in a context of England. The findings of this protocol can provide the full  
51  
52 picture of the use of RWD in NICE appraisal over ten years. Moreover, the study findings could  
53  
54 add more value under the discussion of NICE which tries to broaden the evidence in NICE  
55  
56 practice.  
57  
58  
59  
60



1  
2  
3  
4 The protocol has the limitation that it has been developed to study the use of RWD in NICE  
5  
6 appraisals of oncology drugs. Consequently, the data extraction protocol may not be fully  
7  
8 applicable to appraisals in other disease areas or to the different practice of other HTA bodies.  
9  
10 Since the documentation is significantly different depending on each country's context, it is  
11  
12 not feasible for the protocol to extract the same information as in English context. However,  
13  
14 many of the distinctions are of wider application, e.g. parametric vs non-parametric use of  
15  
16 RWD, and the taxonomy of where in an economic evaluation it might be relevant to look for  
17  
18 use of RWD. Also, the hypotheses are potentially of wider application. The results are going  
19  
20 to be specific to NICE but otherwise the structure of this research has wider application.  
21  
22 Although not fully transferrable, this protocol can be modified for use in other HTA contexts.  
23  
24  
25  
26  
27  
28  
29  
30  
31

### 32 **Ethics and dissemination**

33  
34  
35 This study is approved by the Ethics Committee of the London School of Hygiene and Tropical  
36  
37 Medicine on 14 November 2019 (17315). Results will be published in peer-reviewed journals.  
38  
39  
40  
41  
42  
43

### 44 **PATIENT AND PUBLIC INVOLVEMENT**

45  
46  
47 No patient involved.  
48  
49  
50  
51  
52

### 53 **ACKNOWLEDGEMENTS**

54  
55  
56 The authors thank to David Lugo-Palacios for useful advice on clarity of data extraction and  
57  
58 validation process.  
59  
60

## CONTRIBUTORS

Both authors contributed to conceptualising and designing the study. JK drafted the protocol manuscript. JC revised the manuscript for important intellectual content and contributed to the methodology.

## FUNDING STATEMENT

JK is supported by the Centre for Cancer Biomarkers, University of Bergen funded by the Research Council of Norway grant number (223250). The funder was not involved in the design of the protocol or decision to submit the protocol for publication, nor will they be involved in any aspect of the study conduct.

## COMPEPTING INTEREST STATEMENT

None declared.

## FULL REFERENCES

1. Makady A, de Boer A, Hillege H, Klungel O, Goettsch W. What Is Real-World Data? A Review of Definitions Based on Literature and Stakeholder Interviews. Value Heal [Internet]. 2017;20(7):858–65. Available from: <http://dx.doi.org/10.1016/j.jval.2017.03.008>

- 1  
2  
3  
4 2. WHO. WHO | HTA Definitions. WHO [Internet]. 2015 [cited 2019 May 13]; Available  
5 from: <https://www.who.int/health-technology-assessment/about/Defining/en/>  
6  
7
- 8  
9  
10 3. York Health Economics Consortium. Health Technology Assessment (online) [Internet].  
11  
12 2016 [cited 2021 Oct 4]. Available from: [https://yhec.co.uk/glossary/health-](https://yhec.co.uk/glossary/health-technology-assessment/)  
13  
14 [technology-assessment/](https://yhec.co.uk/glossary/health-technology-assessment/)  
15  
16
- 17  
18 4. Chan K, Nam S, Evans B, Deoliveira C, Chambers A, Gavura S, et al. Developing a  
19  
20 framework to incorporate real-world evidence in cancer drug funding decisions: The  
21  
22 Canadian Real-world Evidence for Value of Cancer Drugs (CanREValue) collaboration.  
23  
24 BMJ Open. 2020 Jan 7;10(1).  
25  
26
- 27  
28 5. Hilgers R. Design and analysis of clinical trials for small rare disease populations. J Rare  
29  
30 Dis Res Treat. 2016 Nov 1;1(3):53–60.  
31  
32
- 33  
34 6. Averitt AJ, Weng C, Ryan P, Perotte A. Translating evidence into practice: eligibility  
35  
36 criteria fail to eliminate clinically significant differences between real-world and study  
37  
38 populations. npj Digit Med 2020 31 [Internet]. 2020 May 11 [cited 2021 Oct 5];3(1):1–  
39  
40 10. Available from: <https://www.nature.com/articles/s41746-020-0277-8>  
41  
42
- 43  
44 7. Latimer N. Survival Analysis For Economic Evaluations Alongside Clinical Trials -  
45  
46 Extrapolation with Patient-Level Data - PubMed - NCBI. Med Decis Mak [Internet]. 2013  
47  
48 [cited 2019 May 14];33(6):743–54. Available from:  
49  
50 <https://www.ncbi.nlm.nih.gov/pubmed/27905716>  
51  
52
- 53  
54 8. Davies C, Briggs A, Lorgelly P, Garellick G, Malchau H. The “hazards” of extrapolating  
55  
56 survival curves. Med Decis Mak [Internet]. 2013 Apr [cited 2020 Aug 17];33(3):369–80.  
57  
58 Available from: <https://pubmed.ncbi.nlm.nih.gov/23457025/>  
59  
60

- 1  
2  
3  
4 9. Katkade VB, Sanders KN, Zou KH. Real world data: An opportunity to supplement  
5  
6 existing evidence for the use of long-established medicines in health care decision  
7  
8 making. *J Multidiscip Healthc*. 2018;11:295–304.  
9  
10
- 11  
12 10. Littlejohns P, Chalkidou K, Culyer AJ, Weale A, Rid A, Kieslich K, et al. National Institute  
13  
14 for Health and Care Excellence, social values and healthcare priority setting [Internet].  
15  
16 Vol. 112, *Journal of the Royal Society of Medicine*. SAGE Publications Ltd; 2019 [cited  
17  
18 2021 May 11]. p. 173–9. Available from:  
19  
20 <https://journals.sagepub.com/doi/full/10.1177/0141076819842846>  
21  
22
- 23  
24 11. Schlander M. *Health Technology Assessments by the National Institute for Health and*  
25  
26 *Clinical Excellence*. Health Technology Assessments by the National Institute for Health  
27  
28 and Clinical Excellence. Springer New York; 2007.  
29  
30
- 31  
32 12. Broader types of data to be used in development of NICE guidance | News and features  
33  
34 | News | NICE [Internet]. [cited 2020 May 5]. Available from:  
35  
36 [https://www.nice.org.uk/news/article/broader-types-of-data-to-be-used-in-](https://www.nice.org.uk/news/article/broader-types-of-data-to-be-used-in-development-of-nice-guidance)  
37  
38 [development-of-nice-guidance](https://www.nice.org.uk/news/article/broader-types-of-data-to-be-used-in-development-of-nice-guidance)  
39  
40  
41
- 42  
43 13. Wang S, Goring SM, Lozano-Ortega G. Inclusion of real-world evidence in submission  
44  
45 packages to health technology assessment bodies: What do current guidelines indicate?  
46  
47 *Value Heal* [Internet]. 2016 May 1 [cited 2020 Jun 22];19(3):A287. Available from:  
48  
49 <http://www.valueinhealthjournal.com/article/S1098301516008317/fulltext>  
50  
51  
52
- 53  
54 14. Pietri G, Masoura P. Market Access and Reimbursement: The Increasing Role of Real-  
55  
56 World Evidence. *Value Heal* [Internet]. 2014 Nov 1 [cited 2020 Jun 22];17(7):A450–1.  
57  
58 Available from:  
59  
60

- 1  
2  
3  
4 <http://www.valueinhealthjournal.com/article/S1098301514031465/fulltext>  
5  
6  
7  
8 15. Harwood M, Deighton A, Mickle A, Qian C, Szabo S. The use of real-world data in health  
9  
10 technology assessment of medications for rare diseases. Value Heal [Internet]. 2019  
11  
12 Nov 1 [cited 2020 Sep 10];22:S863. Available from:  
13  
14 <http://www.valueinhealthjournal.com/article/S1098301519348296/fulltext>  
15  
16  
17  
18 16. Roberts MH, Ferguson GT. Real-World Evidence: Bridging Gaps in Evidence to Guide  
19  
20 Payer Decisions. PharmacoEconomics - Open [Internet]. 2021 Mar 18 [cited 2021 Jun  
21  
22 29];5(1):3–11. Available from: <https://doi.org/10.1007/s41669-020-00221-y>  
23  
24  
25  
26 17. Bullement A, Podkonjak T, Robinson MJ, Benson E, Selby R, Hatzwell AJ, et al. Real-  
27  
28 world evidence use in assessments of cancer drugs by NICE. Int J Technol Assess Health  
29  
30 Care [Internet]. 2020 Aug 1 [cited 2021 May 12];36(4):388–94. Available from:  
31  
32 <https://doi.org/10.1017/S0266462320000434>  
33  
34  
35  
36 18. FDA. Real-World Evidence [Internet]. 2020 [cited 2020 May 6]. Available from:  
37  
38 <https://www.fda.gov/science-research/science-and-research-special-topics/real->  
39  
40  
41 world-evidence  
42  
43  
44 19. Guide to the multiple technology appraisal process [Internet]. [cited 2020 Aug 7].  
45  
46 Available from: [www.nice.org.uk](http://www.nice.org.uk)  
47  
48  
49  
50  
51  
52  
53  
54  
55  
56  
57  
58  
59  
60

1  
2  
3 **Figure Legends**  
4

5  
6 Figure 1 Inclusion/exclusion criteria  
7

8  
9 Figure 2 The framework for data extraction  
10

11  
12 Figure 3 Hypotheses about increased use of RWD  
13  
14  
15  
16  
17

18  
19 **Supplement Legends**  
20

21  
22 Supplement 1 Glossary of variables in extraction template  
23  
24  
25  
26  
27  
28  
29  
30  
31  
32  
33  
34  
35  
36  
37  
38  
39  
40  
41  
42  
43  
44  
45  
46  
47  
48  
49  
50  
51  
52  
53  
54  
55  
56  
57  
58  
59  
60

1  
2  
3  
4  
5  
6  
7  
8  
9  
10  
11  
12  
13  
14  
15  
16  
17  
18  
19  
20  
21  
22  
23  
24  
25  
26  
27  
28  
29  
30  
31  
32  
33  
34  
35  
36  
37  
38  
39  
40  
41  
42  
43  
44  
45  
46  
47  
48  
49  
50  
51  
52  
53  
54  
55  
56  
57  
58  
59  
60

|                                                                                                                       |
|-----------------------------------------------------------------------------------------------------------------------|
| <b>Inclusion criteria</b>                                                                                             |
| - STA of oncology medicine                                                                                            |
| - Appraisals issued from January 2011 to May 2021                                                                     |
| <b>Exclusion criteria</b>                                                                                             |
| - Appraisal of technology for preventing the complications of cancer                                                  |
| - Appraisal of surgical practice and other therapeutic therapies                                                      |
| - Appraisals for which evidence is not available (withdrawn appraisals) or was never supplied (terminated appraisals) |

Figure 1 Inclusion/exclusion criteria

131x35mm (240 x 240 DPI)

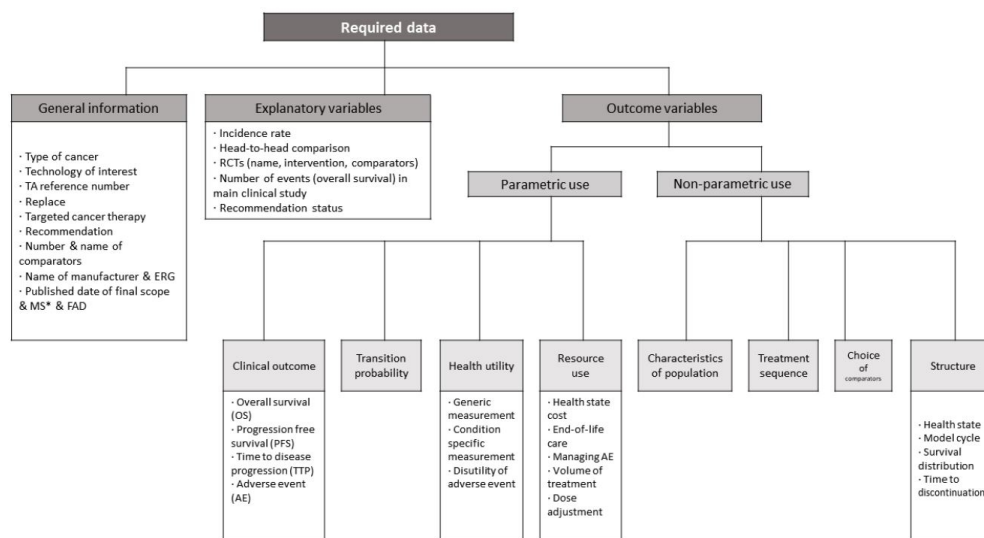

\* Published date of MS: the date when it was submitted by the manufacturer, which is stated on manufacturer submission document

Figure 2 The framework for data extraction

141x84mm (240 x 240 DPI)



- 1) Poor internal/external validity of the clinical trial is associated with greater use of RWD.
- 2) Absence of direct (head-to-head) comparison is associated with greater use of RWD.
- 3) Low incidence rate of the disease is associated with greater use of RWD.
- 4) Immature survival data in the clinical trial are associated with greater use of RWD.
- 5) The technology having been recommended in previous NICE TA guidance is associated with greater use of RWD.

Figure 3 Hypotheses about increased use of RWD

93x24mm (240 x 240 DPI)

Figure 1 Inclusion/exclusion criteria

|                                                                                                                       |
|-----------------------------------------------------------------------------------------------------------------------|
| Inclusion criteria                                                                                                    |
| - STA of oncology medicine                                                                                            |
| - Appraisals issued from January 2011 to May 2021                                                                     |
| Exclusion criteria                                                                                                    |
| - Appraisal of technology for preventing the complications of cancer                                                  |
| - Appraisal of surgical practice and other therapeutic therapies                                                      |
| - Appraisals for which evidence is not available (withdrawn appraisals) or was never supplied (terminated appraisals) |

Figure 2 The framework for data extraction

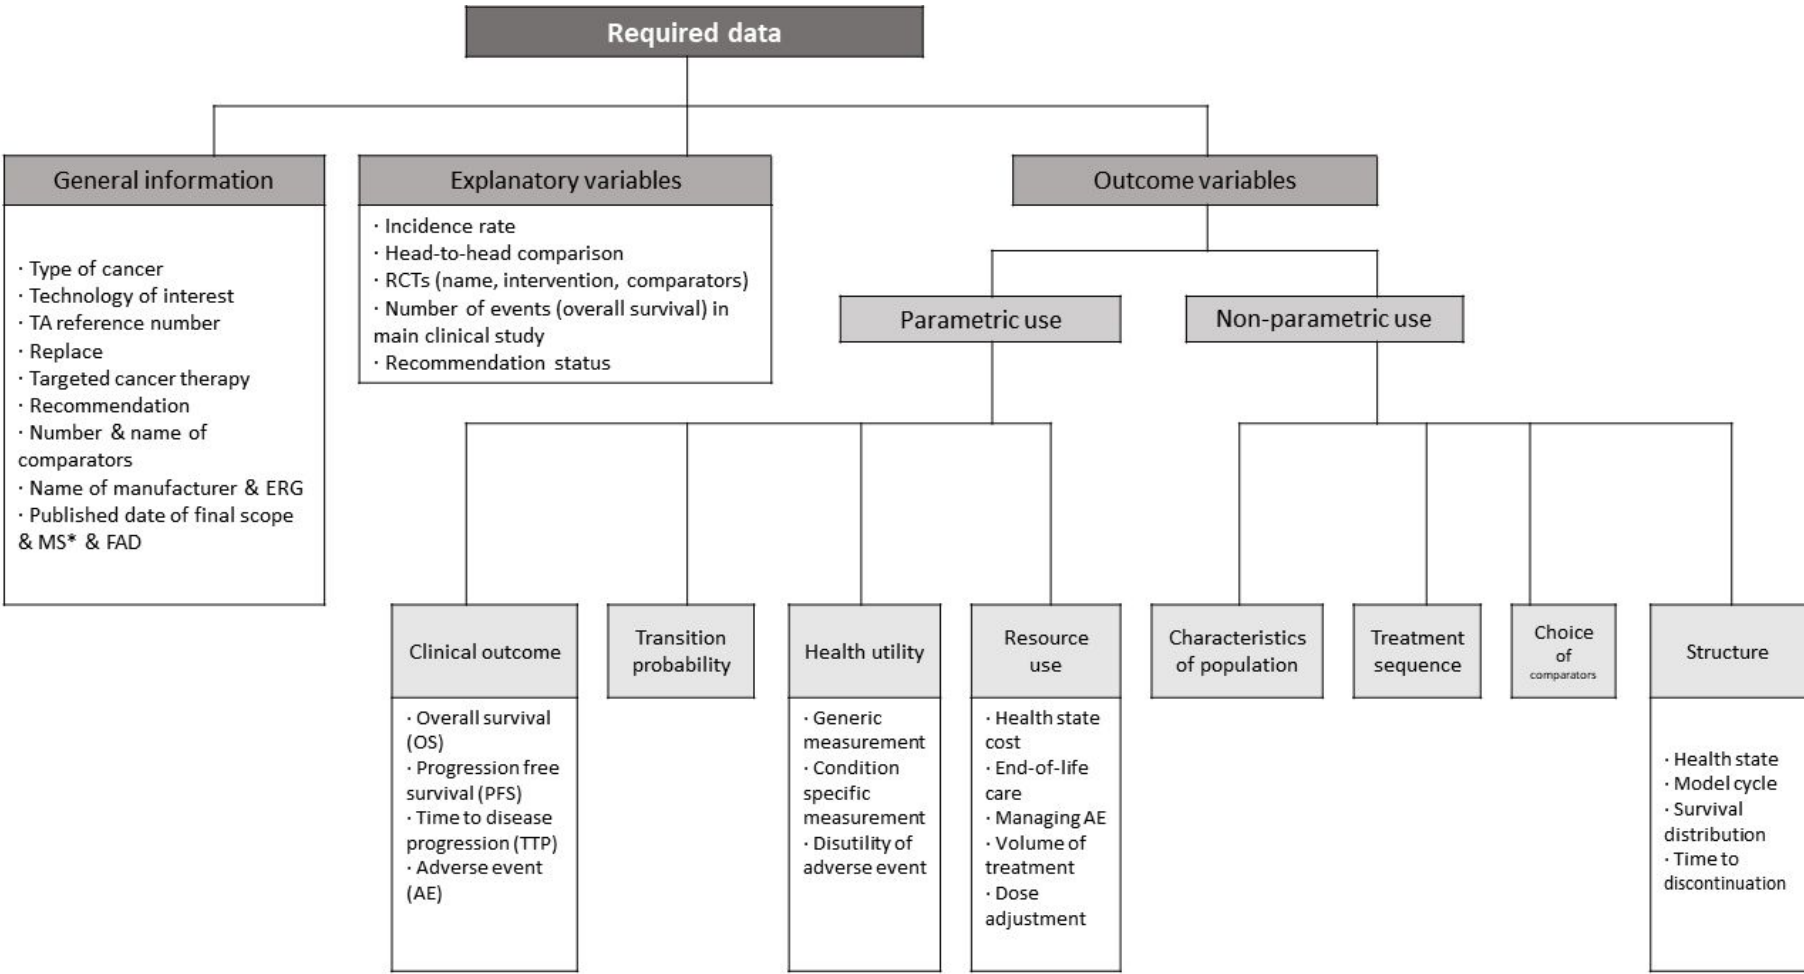

\* Published date of MS: the date when it was submitted by the manufacturer, which is stated on manufacturer submission document

**Figure 3 Hypotheses about increased use of RWD**

- 1) Poor internal/external validity of the clinical trial is associated with greater use of RWD.
- 2) Absence of direct (head-to-head) comparison is associated with greater use of RWD.
- 3) Low incidence rate of the disease is associated with greater use of RWD.
- 4) Immature survival data in the clinical trial are associated with greater use of RWD.
- 5) The technology having been recommended in previous NICE TA guidance is associated with greater use of RWD.

For peer review only

## Supplement 1 Glossary of variables in extraction template

| General information            |                                                                                                                                                                                                                                                                                                                                                                                                                                                                              |                                                                                                                                                                                                                                       |
|--------------------------------|------------------------------------------------------------------------------------------------------------------------------------------------------------------------------------------------------------------------------------------------------------------------------------------------------------------------------------------------------------------------------------------------------------------------------------------------------------------------------|---------------------------------------------------------------------------------------------------------------------------------------------------------------------------------------------------------------------------------------|
| Variable                       | Explanation                                                                                                                                                                                                                                                                                                                                                                                                                                                                  | Coding                                                                                                                                                                                                                                |
| Type of cancer                 | The NICE classification of the cancer<br>(website: <a href="https://www.nice.org.uk/guidance/conditions-and-diseases/cancer">https://www.nice.org.uk/guidance/conditions-and-diseases/cancer</a> )                                                                                                                                                                                                                                                                           | Bladder cancer=1, Blood and bone marrow cancer =2, Breast cancer=3, Colorectal=4, Neuroblastoma=5, Head and neck=6, Liver=7, Lung=8, Oesophageal=9, Ovarian=10, Pancreatic=11, Prostate=12, Renal=13, Skin=14, Stomach=15, Sarcoma=16 |
| Technology of interest         | The name of drug in the current appraisal. If it is combination therapy, the key technology which manufacturer focuses on will be taken here.                                                                                                                                                                                                                                                                                                                                | Narrative description                                                                                                                                                                                                                 |
| Indication                     | Clinical indications which are addressed in Final Appraisal Determination (FAD) document                                                                                                                                                                                                                                                                                                                                                                                     | Narrative description                                                                                                                                                                                                                 |
| TA number                      | the reference number of the technology guidance                                                                                                                                                                                                                                                                                                                                                                                                                              | Narrative description                                                                                                                                                                                                                 |
| Replace                        | Whether TA guidance has replaced or not. Appraisals can be replaced after rapid reviews/reviews/updates of previous appraisals or CDF reviews. Regardless of reasons of replacement, TA reference number which is replaced by this appraisal of interest will be recorded.                                                                                                                                                                                                   | None= 0<br>If current appraisal replaces previous appraisal, the replaced TA reference number is recorded here.                                                                                                                       |
| • Pre-2016 CDF reconsideration | Before April 2016, the drug which was not reviewed or not recommended for routine commissioning by NICE can be used using the previous model of CDF. When new CDF was introduced in April 2016, these drugs in the old CDF were appraised by NICE to transit the model of CDF. This variable describe whether the appraisal of interest is an appraisal of the CDF reconsideration for the drug used in the old model of CDF before 2016.                                    | No, it is not pre-2016 CDF reconsideration =0<br>Yes, it is a appraisal of pre-2016 CDF reconsideration =1                                                                                                                            |
| • 2016 CDF review              | In April 2016, a new model of CDF was introduced. In the new model, an additional recommendation, recommended for use within the CDF is available when NICE appraising cancer drugs. The drug available via the CDF has to collect the data for further review for the routine commissioning after a certain period. As this mandated data collection can impact on the use of RWD, this variable allows to distinguish the appraisals, which RWD is more likely to be used. | No, it is not 2016 CDF review =0<br>Yes, it is 2016 CF review=1                                                                                                                                                                       |
| Targeted cancer therapy        | Treatment that uses drugs or other substances to identify and attack specific types of cancer cells                                                                                                                                                                                                                                                                                                                                                                          | Non-targeted therapy = 0, targeted therapy = 1, not sure = Narrative description                                                                                                                                                      |

|                                |                                                                                                                                                                                                                                                                                                                                                                                                                                                                                                                                                                                                    |                                                                                                                  |
|--------------------------------|----------------------------------------------------------------------------------------------------------------------------------------------------------------------------------------------------------------------------------------------------------------------------------------------------------------------------------------------------------------------------------------------------------------------------------------------------------------------------------------------------------------------------------------------------------------------------------------------------|------------------------------------------------------------------------------------------------------------------|
| Recommendation                 | <p>the classification of recommendations made by the NICE committee in FAD document</p> <ul style="list-style-type: none"> <li>- Not recommended: 0</li> <li>- Recommended (in line with marketing authorisation): 1</li> <li>- Recommended (in line with marketing authorisation) in CDF:2</li> <li>- Optimised: 3</li> <li>- Optimised in CDF: 4</li> <li>- Recommended in research: 5</li> </ul>                                                                                                                                                                                                | Not recommended=0, recommended=1, recommended (cdf)=2, optimised=3, optimised (cdf)=4, recommended in research=5 |
| number of comparators          | Count the number of comparators in each manufacturer submission or FAD document. The information in manufacturer submission and FAD is recorded in the separated rows (manufacturer row/committee row).                                                                                                                                                                                                                                                                                                                                                                                            | Number in the manufacturer's submission                                                                          |
| name of comparators            | Record the name of comparators in manufacturer submission or FAD document                                                                                                                                                                                                                                                                                                                                                                                                                                                                                                                          | Narrative description                                                                                            |
| name of manufacturer           | the name of manufacturer in manufacturer submission                                                                                                                                                                                                                                                                                                                                                                                                                                                                                                                                                | Narrative description                                                                                            |
| name of the ERG                | the name of the ERG (evidence review group)/AG (assessment group) in ERG critiques or AG reports                                                                                                                                                                                                                                                                                                                                                                                                                                                                                                   | Narrative description                                                                                            |
| published date of final scope  | the date of final scope as MM/YYYY                                                                                                                                                                                                                                                                                                                                                                                                                                                                                                                                                                 | Date (MM/YYYY)                                                                                                   |
| published date of manufacturer | the date of manufacturer submission as MM/YYYY.                                                                                                                                                                                                                                                                                                                                                                                                                                                                                                                                                    | Date (MM/YYYY)                                                                                                   |
| published date of FAD guidance | the date of FAD document as MM/YYYY                                                                                                                                                                                                                                                                                                                                                                                                                                                                                                                                                                | Date (MM/YYYY)                                                                                                   |
| <b>Explanatory variables</b>   |                                                                                                                                                                                                                                                                                                                                                                                                                                                                                                                                                                                                    |                                                                                                                  |
| <b>Variable</b>                | <b>Explanation</b>                                                                                                                                                                                                                                                                                                                                                                                                                                                                                                                                                                                 | <b>Coding</b>                                                                                                    |
| Incidence (rate, year)         | <p>The rate would be recorded as it is in the appraisal. Incidence rate could be found in the final scope document or in manufacturer submission document. If the figures are not identical in each document, the latest rate is recorded.</p> <p>Most appraisals present the annual estimate of the number of patients who are eligible for the treatment in the "Budget Impact" section of company submission. This number is mainly used for the incidence. If this information is not available in the appraisal, the number in previous appraisal for similar indication is used instead.</p> | Number                                                                                                           |
| H2H                            | Whether the head-to-head clinical trial of a technology of interest exists or not, which compares with agreed comparators. The information is most likely to be found in the section: Identification and selection of relevant studies in clinical effectiveness part.                                                                                                                                                                                                                                                                                                                             | no=0, yes=1, yes but some comparators missing =2                                                                 |

|                                              |                                                                                                                                                                                                                                                                                                                                                                                                                                                                                                                                                                                                                                                                                             |                                                                               |
|----------------------------------------------|---------------------------------------------------------------------------------------------------------------------------------------------------------------------------------------------------------------------------------------------------------------------------------------------------------------------------------------------------------------------------------------------------------------------------------------------------------------------------------------------------------------------------------------------------------------------------------------------------------------------------------------------------------------------------------------------|-------------------------------------------------------------------------------|
| • ITC                                        | ITC (indirect treatment comparison). The information could be found in the section: Indirect and mixed treatment comparisons in clinical effectiveness part.                                                                                                                                                                                                                                                                                                                                                                                                                                                                                                                                | no=0, yes=1                                                                   |
| • RCT (technology of interest)               | Main RCT used in the appraisal: the name of the H2H RCT, if it exists. Unless there is an H2H, RCT refers to the clinical trial of technology of interest in the ITC.                                                                                                                                                                                                                                                                                                                                                                                                                                                                                                                       | no=0, yes=1                                                                   |
| - Name of RCT                                | The name of the aforementioned RCT                                                                                                                                                                                                                                                                                                                                                                                                                                                                                                                                                                                                                                                          | Narrative description                                                         |
| - Intervention in RCT                        | The name of the intervention used in the aforementioned RCT. This variable helps to identify the main technology in RCT when technology is appraised as combination therapy.                                                                                                                                                                                                                                                                                                                                                                                                                                                                                                                | Narrative description                                                         |
| - Comparators in RCT                         | The comparator of the aforementioned RCT                                                                                                                                                                                                                                                                                                                                                                                                                                                                                                                                                                                                                                                    | Narrative description                                                         |
| - Size of RCT                                | The number of participants in the aforementioned RCT                                                                                                                                                                                                                                                                                                                                                                                                                                                                                                                                                                                                                                        | Number                                                                        |
| - Median duration of follow-up               | The median duration of follow-up in the aforementioned RCT. If it is not reported, record as NR (not reported).                                                                                                                                                                                                                                                                                                                                                                                                                                                                                                                                                                             | Unit: month<br>Not reported = ..                                              |
| • Anchored/unanchored                        | “Anchored” means that RCT of technology of interest exists, and the RCT has been linked to any other studies which evaluate the drug’s effectiveness.<br>“Unanchored” means that the clinical outcome study doesn’t have any comparators which connect to other studies. For example, comparing a single-arm study with a single-arm study is “unanchored”. Also, RCTs compared without common comparators in ITC is “unanchored”.                                                                                                                                                                                                                                                          | Not anchored=0,<br>Anchored =1                                                |
| • MAIC/STC                                   | Matching adjusted indirect comparison (MAIC), Simulated Treatment Comparison (STC). A methodology of making adjustment to increase the comparability of two distinct populations mostly among unanchored studies. But it could be used in anchored studies in case where the two populations in ITC is starkly different from each other.                                                                                                                                                                                                                                                                                                                                                   | Naive=0,<br>MAIC=1<br>STC=2<br>Other methods=3                                |
| Risk of bias (RoB) of RCT (direct quotation) | In order to evaluate the internal validity of RCTs, the risk of bias, which was reported in the ERG report, will be recorded here. Information is available at the quality assessment part of the ERG report. The ERG assesses the risk of bias of the included study using quality assessment tools. The ERG statement is directly quoted. The ERG often addresses the issue of quality of study narratively. Moreover, the ERG uses different terminology, whereas the domain of assessment is consistent. Therefore, the risk of bias would be narratively recorded. Prior to analysis, it will be scored by looking at the number of factors about which the ERG has expressed concern. | Direct quotation from ERG documents                                           |
| • Risk of bias in RCT (grade)                | In order to conduct statistical analysis, a set of codes will be used here. The direct quotation will be classified into four groups following the number of risk factors.                                                                                                                                                                                                                                                                                                                                                                                                                                                                                                                  | High/good quality without mentioned weakness= 0, risk factor 1 (low) =1, risk |

|                                                                                                         |                                                                                                                                                                                                                                                                                                                                                                                                                                                                                                                                                                                                            |               |                                                                                                                                     |
|---------------------------------------------------------------------------------------------------------|------------------------------------------------------------------------------------------------------------------------------------------------------------------------------------------------------------------------------------------------------------------------------------------------------------------------------------------------------------------------------------------------------------------------------------------------------------------------------------------------------------------------------------------------------------------------------------------------------------|---------------|-------------------------------------------------------------------------------------------------------------------------------------|
|                                                                                                         |                                                                                                                                                                                                                                                                                                                                                                                                                                                                                                                                                                                                            |               | factor 2-3 (moderate)=2, risk factor 4 (high) =3                                                                                    |
| External validity of RCT                                                                                | As narrative accounts, generalisability of RCT is reported in the ERG report whether the population of RCT properly represents the UK general population in terms of aging structure, health status and health care practice (practice-dose, subsequent treatment, etc.).                                                                                                                                                                                                                                                                                                                                  |               | Direct quotation from ERG documents                                                                                                 |
| <ul style="list-style-type: none"> <li>External validity in RCT (grade)</li> </ul>                      | In order to conduct statistical analysis, a set of codes will be used here. The direct quotation will be classified into three groups following the severity of generalisability assess by ERG.                                                                                                                                                                                                                                                                                                                                                                                                            |               | Representative without mentioned weakness= 0, Representative but minor concerns =1, Questionable generalisability =2                |
| Previously recommended in other indication                                                              | Whether the technology has been recommended for other types of cancers besides the current indication of the technology.                                                                                                                                                                                                                                                                                                                                                                                                                                                                                   |               | No =0, Yes including all recommend, CDF, Optimised, Optimised (cdf) =1                                                              |
| <ul style="list-style-type: none"> <li>TA number &amp; date of appraisal in other indication</li> </ul> | If it was recommended for other indications, record the TA number and the date of the FAD documents (MM/YYYY).                                                                                                                                                                                                                                                                                                                                                                                                                                                                                             |               | Narrative description of date                                                                                                       |
| Previous recommended treatment in the same cancer                                                       | Whether the technology has been recommended for other treatment lines in the same type of cancer.                                                                                                                                                                                                                                                                                                                                                                                                                                                                                                          |               | No =0, Yes including all recommend, CDF, Optimised, Optimised (cdf) =1                                                              |
| <ul style="list-style-type: none"> <li>TA number &amp; date of appraisal in the same cancer</li> </ul>  | If it was recommended for other treatment lines in the same cancer category, record the TA number and the date of the FAD documents (MM/YYYY).                                                                                                                                                                                                                                                                                                                                                                                                                                                             |               | Narrative description of date                                                                                                       |
| Maturity of survival data in clinical trial                                                             | The data maturity is examined by looking at the number of events (deaths) of intervention arm in clinical trials.<br>In published appraisal document, some of the information is redacted due to confidentiality. If the information is not available, the article of clinical trial published in journals is searched in order to check how many events are observed during the trial. Nonetheless, data are still not available in some cases. Since manufacturer is likely to redact the OS information when median OS was not reached. Hence, the survival data in this case are regarded as immature. |               | Direct quote from manufacturer submission                                                                                           |
| <ul style="list-style-type: none"> <li>Maturity (grade)</li> </ul>                                      | The direct quotation will be classified into three groups following the data cut point, 20% and 50 % of the number of events. This protocol adapts the criterion for measuring maturity of survival data in Tai et al. which investigates data maturity in STAs by looking at the proportion of death in pivotal trials. In the study, 20, 50 and 70 % of proportion of number of deaths are used to discuss the maturity of survival data (1). This protocol only uses 20% and 50% to assess the maturity without the category "unclear."                                                                 |               | Immature (number of events < 20%) =1,<br>Relatively immature (20% ≤ number of events ≤ 50%)=2<br>Mature (number of events < 50%) =3 |
| <b>Outcome variables</b>                                                                                |                                                                                                                                                                                                                                                                                                                                                                                                                                                                                                                                                                                                            |               |                                                                                                                                     |
| <b>Variable</b>                                                                                         | <b>Explanation</b>                                                                                                                                                                                                                                                                                                                                                                                                                                                                                                                                                                                         | <b>Coding</b> | <b>Example</b>                                                                                                                      |



|                                              |                                                   |                                                                                                                                                                                                                                                                                                                                      |                                                       |                                                                                                                                                                                                                                                                                                                                                                    |
|----------------------------------------------|---------------------------------------------------|--------------------------------------------------------------------------------------------------------------------------------------------------------------------------------------------------------------------------------------------------------------------------------------------------------------------------------------|-------------------------------------------------------|--------------------------------------------------------------------------------------------------------------------------------------------------------------------------------------------------------------------------------------------------------------------------------------------------------------------------------------------------------------------|
| 1<br>2<br>3<br>4<br>5<br>6<br>7<br>8<br>9    | characteristic of population                      | Whether RWD are used to determine the characteristic of population, including the initiation age and health performance status (ECOG) or not.<br>- Soft use: when RWD are supplementary evidence to decide the population characteristics<br>- Hard use: when RWD determine the characteristics of population in economic evaluation | No RWD = 0<br>Yes, data from RWD = 1<br>Not clear = 9 | - Pomalidomide, in combination with low - dose dexamethasone, for treating multiple myeloma in adults at third or subsequent relapse (NICE TA427): baseline patient characteristics were obtained from RWD collected from a hospital population since the majority of the trial populations were previously untreated, which was different from target population. |
| 10<br>11<br>12<br>13<br>14<br>15<br>16<br>17 | treatment sequence                                | Whether RWD are used to determine the subsequent treatment option or not.<br>After the disease progression onto the later stages of cancer treatments, patients are likely to receive idiosyncratic subsequent treatments. The pattern of subsequent treatment for cost-effectiveness analysis could be observed by RCT or RWD.      | No RWD = 0<br>Yes, data from RWD = 1<br>Not clear = 9 | - Palbociclib with an aromatase inhibitor for previously untreated, hormone receptor-positive, HER2-negative, locally advanced or metastatic breast cancer (NICE TA495): a study of medical records was used to determine the treatment sequence.                                                                                                                  |
| 18<br>19<br>20<br>21<br>22<br>23             | choice of comparator                              | Whether RWD are used to choose the comparators in economic evaluation or not.<br>Although comparators are chosen based on the current clinical guideline, drug utilisation data or clinical expert opinion are frequently referred to find the most relevant comparators in evaluation.                                              | No RWD = 0<br>Yes, data from RWD = 1<br>Not clear = 9 | - Ixazomib with lenalidomide and dexamethasone for treating relapsed or refractory multiple myeloma (NICE TA505): the manufacturer considered that lenalidomide was appropriate comparator based on IMS market research data (lenalidomide, 69% market share and panobinostat, 7%).                                                                                |
| 24<br>25<br>26<br>27<br>28<br>29             | structure (health state)                          | Whether RWD are used to determine the health state such as stable, progression, and death in a given model. Information is available at health state in the model of cost-effectiveness analysis in manufacturer submission documents.                                                                                               | No RWD = 0<br>Yes, data from RWD = 1<br>Not clear = 9 | - Palbociclib with an aromatase inhibitor for previously untreated, hormone receptor-positive, HER2-negative, locally advanced or metastatic breast cancer (NICE TA495): the model health state of post-progression was specified based on a retrospective patient medical record review study.                                                                    |
| 30<br>31<br>32<br>33                         | structure (model cycle)                           | Whether RWD are used to determine model cycle or not. Model cycle, hereby, means that the duration between different health states, which can be influenced by the severity of conditions.                                                                                                                                           | No RWD = 0<br>Yes, data from RWD = 1<br>Not clear = 9 | N/A **                                                                                                                                                                                                                                                                                                                                                             |
| 34<br>35<br>36<br>37<br>38<br>39<br>40       | Structure (survival distribution of intervention) | Whether RWD are used to decide the survival distribution of intervention or not.<br>Since survival rate observed in RCTs is immature, it is necessary to extrapolate the survival rate for analysis. In order to choose proper survival distribution, the goodness of fit is tested (AIC, BIC).                                      | No RWD = 0<br>Yes, data from RWD = 1<br>Not clear = 9 | - Larotrectinib for treating advanced solid tumours with NTRK fusions (NICE TA630): UK all-cause mortality data were used to assess the clinical acceptability of distributions whether patient overall survival exceeded current UK life expectancy                                                                                                               |

1  
2  
3  
4  
5  
6  
7  
8  
9  
10  
11  
12  
13  
14  
15  
16  
17  
18  
19  
20  
21  
22  
23  
24  
25  
26  
27  
28  
29  
30  
31  
32  
33  
34  
35  
36  
37  
38  
39  
40  
41  
42  
43  
44  
45  
46

|                                                                |                                                                                                                                                                                                                                                                                                                                                                                                                                                                                                                                                                                                                                                                                 |                                                                |                                                                                                                                                                                                                                                                 |
|----------------------------------------------------------------|---------------------------------------------------------------------------------------------------------------------------------------------------------------------------------------------------------------------------------------------------------------------------------------------------------------------------------------------------------------------------------------------------------------------------------------------------------------------------------------------------------------------------------------------------------------------------------------------------------------------------------------------------------------------------------|----------------------------------------------------------------|-----------------------------------------------------------------------------------------------------------------------------------------------------------------------------------------------------------------------------------------------------------------|
|                                                                | <p>Also, the clinical plausibility is asked to validate the distribution. In this case, the alternative data can be utilized.</p> <ul style="list-style-type: none"> <li>- If RWD is utilised for choosing distribution, mark as “hard use”.</li> <li>- If RWD is utilised as supplementary evidence for the chosen distribution, mark as “soft use”.</li> </ul>                                                                                                                                                                                                                                                                                                                |                                                                |                                                                                                                                                                                                                                                                 |
| <p>Structure<br/>(survival distribution of comparator)</p>     | <p>Whether RWD are used to validate the feasibility of survival distribution of comparator or not.</p> <p>As survival distributions of intervention and comparators are separately determined, the extraction tool approach it independently. Apply the abovementioned description on survival distribution of intervention to comparator in this row.</p>                                                                                                                                                                                                                                                                                                                      | <p>No RWD = 0<br/>Yes, data from RWD = 1<br/>Not clear = 9</p> |                                                                                                                                                                                                                                                                 |
| <p>Structure<br/>(Time to discontinuation of intervention)</p> | <p>Whether RWD are used to decide the time to discontinuation of intervention or not.</p> <p>The time to discontinuation is likely to be decided by 1) simply adopting discontinuation rule in trials, 2) formulating distribution of discontinuation, or 3) clinical experts’ opinion.</p> <ul style="list-style-type: none"> <li>- If RWD are used for designating the time to discontinuation, mark as “hard use”</li> <li>- If RWD are used as supplementary evidence for designating the time to discontinuation, mark as “soft use”.</li> <li>- If clinical experts’ opinions are used for designating the time to discontinuation, it is not regarded as RWD.</li> </ul> | <p>No RWD = 0<br/>Yes, data from RWD = 1<br/>Not clear = 9</p> | <ul style="list-style-type: none"> <li>- Lorlatinib for previously treated ALK-positive advanced non-small-cell lung cancer (NICE TA628): The plausibility of the extrapolation of time on treatment was validated by UK RWD, hospital network data.</li> </ul> |
| <p>Structure<br/>(time to discontinuation of comparator)</p>   | <p>Whether RWD are used to decide the time to discontinuation of comparator or not.</p> <p>Apply the above-mentioned description on time to discontinuation of intervention to comparator in this</p>                                                                                                                                                                                                                                                                                                                                                                                                                                                                           | <p>No RWD = 0<br/>Yes, data from RWD = 1<br/>Not clear = 9</p> |                                                                                                                                                                                                                                                                 |

1  
2  
3  
4  
5  
6  
7  
8  
9  
10  
11  
12  
13  
14  
15  
16  
17  
18  
19  
20  
21  
22  
23  
24  
25  
26  
27  
28  
29  
30  
31  
32  
33  
34  
35  
36  
37  
38  
39  
40  
41  
42  
43  
44  
45  
46

1  
2  
3  
4  
5  
6  
7  
8  
9  
10  
11  
12  
13  
14  
15  
16  
17  
18  
19  
20  
21  
22  
23  
24  
25  
26  
27  
28  
29  
30  
31  
32  
33  
34  
35  
36  
37  
38  
39  
40  
41  
42  
43  
44  
45  
46

|                                     |                                                                                                                                                                                                                                                                                                                                                                   |                                                       |                                                                                                                                                                                                                                                                                        |
|-------------------------------------|-------------------------------------------------------------------------------------------------------------------------------------------------------------------------------------------------------------------------------------------------------------------------------------------------------------------------------------------------------------------|-------------------------------------------------------|----------------------------------------------------------------------------------------------------------------------------------------------------------------------------------------------------------------------------------------------------------------------------------------|
|                                     | row.                                                                                                                                                                                                                                                                                                                                                              |                                                       |                                                                                                                                                                                                                                                                                        |
| Clinical outcome intervention (OS)  | Whether RWD give the figure for overall survival (OS) of intervention or not. In order to measure the Quality Adjusted Life-Years (QALYs), it is necessary to extrapolate overall survival based on observed data on survival. The survival data could come from RCT or RWD.                                                                                      | No RWD = 0<br>Yes, data from RWD = 1<br>Not clear = 9 | - Nivolumab for adjuvant treatment of completely resected melanoma with lymph node involvement or metastatic disease (NICE TA558): the survival model applied the registry data (American Joint Committee on Cancer; AJCC) to both treatment arms after a certain time point.          |
| Clinical outcome intervention (PFS) | Whether RWD give the figure for progression free survival (PFS) of intervention or not. The progression of disease is important for economic evaluation model in terms of health state transitions and treatment switching. The survival data could come from RCT or RWD.                                                                                         | No RWD = 0<br>Yes, data from RWD = 1<br>Not clear = 9 | N/A**                                                                                                                                                                                                                                                                                  |
| Clinical outcome intervention (RR)  | Whether RWD provides the response rate (RR) for the intervention or not. The effectiveness of cancer treatment is often shown by responses of tumour cells, which is evaluated by the RECIST criteria or other criteria. The response rate data would be collected in RCT or other type of data.                                                                  | No RWD = 0<br>Yes, data from RWD = 1<br>Not clear = 9 | N/A**                                                                                                                                                                                                                                                                                  |
| Clinical outcome intervention (TTP) | Whether RWD give the figure for time-to-progression (TTP) of intervention or not. Some cancer treatments show their clinical effectiveness not through the progression free survival (PFS), but alternatively through time-to-progression.                                                                                                                        | No RWD = 0<br>Yes, data from RWD = 1<br>Not clear = 9 | N/A**                                                                                                                                                                                                                                                                                  |
| Clinical outcome intervention (AE)  | Whether RWD give the figure of adverse event (AE) of intervention or not. Adverse events are crucial information for the estimation of the QALYs. The adverse events are collected in RCT. However, RWD, including cohort studies, retrospective studies, or other type of studies, also provide the information of adverse events, which cannot be found in RCT. | No RWD = 0<br>Yes, data from RWD = 1<br>Not clear = 9 | - Blinatumomab for treating acute lymphoblastic leukaemia in remission with minimal residual disease activity (NICE TA589): retrospective non-interventional cohort study collected from 2000 to 2017 was used to inform the clinical outcome of comparators as well as adverse event. |
| Clinical outcome comparators (OS)   | Whether RWD give the figure of overall survival (OS) of comparators or not.                                                                                                                                                                                                                                                                                       | No RWD = 0<br>Yes, data from RWD = 1<br>Not clear = 9 | Refer to the variable, clinical outcome (OS) intervention                                                                                                                                                                                                                              |

|                                                     |                                                                                                                                                                                                                                                                                                                                                        |                                                       |                                                                                                                                                                                                                                                                                                                                                 |
|-----------------------------------------------------|--------------------------------------------------------------------------------------------------------------------------------------------------------------------------------------------------------------------------------------------------------------------------------------------------------------------------------------------------------|-------------------------------------------------------|-------------------------------------------------------------------------------------------------------------------------------------------------------------------------------------------------------------------------------------------------------------------------------------------------------------------------------------------------|
| Clinical outcome comparators (PFS)                  | Whether RWD give the figure for the progression free survival (PFS) of comparators or not.                                                                                                                                                                                                                                                             | No RWD = 0<br>Yes, data from RWD = 1<br>Not clear = 9 | N/A**                                                                                                                                                                                                                                                                                                                                           |
| Clinical outcome comparators (RR)                   | Whether RWD provide the response rate (RR) of comparators or not.                                                                                                                                                                                                                                                                                      | No RWD = 0<br>Yes, data from RWD = 1<br>Not clear = 9 | N/A**                                                                                                                                                                                                                                                                                                                                           |
| Clinical outcome comparators (TTP)                  | Whether RWD provide the time-to-progression (TTP) of comparators or not.                                                                                                                                                                                                                                                                               | No RWD = 0<br>Yes, data from RWD = 1<br>Not clear = 9 | N/A**                                                                                                                                                                                                                                                                                                                                           |
| Clinical outcome comparators (AE)                   | Whether RWD provide the figure adverse events (AE) for the comparators or not.                                                                                                                                                                                                                                                                         | No RWD = 0<br>Yes, data from RWD = 1<br>Not clear = 9 | Refer to the variable, clinical outcome (AE) intervention                                                                                                                                                                                                                                                                                       |
| Transition probability                              | Whether RWD provide the transition probability from one state to other state, if it is applicable.                                                                                                                                                                                                                                                     | No RWD = 0<br>Yes, data from RWD = 1<br>Not clear = 9 | - Pembrolizumab for treating melanoma with high risk of recurrence (NICE TA553): electronic health records (Flatiron database) collected by cancer care providers in the US was used to model transition from the "locoregional recurrence (LR)" state to the "distant metastases" and life tables for transition from the LR to "death" state. |
| Health utility of health state (generic)            | Whether health state utility survey of generic measurement is done in RWD or RCT. Health state utility is necessary information for the estimation of the QALYs. Generic health utility measurement, EQ-5D, is frequently used. There is national tariff of EQ-5D to get the scores. Hereby, the way of collecting survey (RWD or RCT) is highlighted. | No RWD = 0<br>Yes, data from RWD = 1<br>Not clear = 9 | N/A**                                                                                                                                                                                                                                                                                                                                           |
| Health utility of health state (condition-specific) | Whether health state utility survey of condition-specific measurement is done in RWD or RCT. In cancer treatment, condition-specific measurement is commonly adopted. Similar to the previous row, the way of collecting survey (RWD or RCT) is highlighted.                                                                                           | No RWD = 0<br>Yes, data from RWD = 1<br>Not clear = 9 | N/A**                                                                                                                                                                                                                                                                                                                                           |

|                                                                                |                                                 |                                                                                                                                                                                                                                                                                                                                                                                                                                                                                                                                                                                                                                                        |                                                       |                                                                                                                                                                                                                                                                                                                                                                                                          |
|--------------------------------------------------------------------------------|-------------------------------------------------|--------------------------------------------------------------------------------------------------------------------------------------------------------------------------------------------------------------------------------------------------------------------------------------------------------------------------------------------------------------------------------------------------------------------------------------------------------------------------------------------------------------------------------------------------------------------------------------------------------------------------------------------------------|-------------------------------------------------------|----------------------------------------------------------------------------------------------------------------------------------------------------------------------------------------------------------------------------------------------------------------------------------------------------------------------------------------------------------------------------------------------------------|
| 1<br>2<br>3<br>4<br>5<br>6<br>7                                                | Disutility of adverse events                    | Whether survey of collecting disutility data is done in RWD or RCT. As adverse events are likely to reduce the patient's quality of life, the disutility of adverse events is included in estimates. The way of collecting survey (RWD or RCT) is drawn to attention.                                                                                                                                                                                                                                                                                                                                                                                  | No RWD = 0<br>Yes, data from RWD = 1<br>Not clear = 9 | N/A**                                                                                                                                                                                                                                                                                                                                                                                                    |
| 8<br>9<br>10<br>11<br>12<br>13<br>14<br>15<br>16<br>17<br>18<br>19<br>20<br>21 | Resource use (Health state cost) common         | Whether resource use for estimating health state cost is derived from RWD or RCT. In economic evaluation, the unit cost mostly comes from the national reference cost. The total cost is calculated by the total resource use (volume of technology and health care services) multiplied by the reference cost. Here, the only resource use is focused in data extraction. Resource use for estimating health state cost includes all activity like monitoring, GP visits, pharmacy cost etc. Health state resource use could be aggregated or individually listed. Here, the difference of describing health state cost is not separately considered. | No RWD = 0<br>Yes, data from RWD = 1<br>Not clear = 9 | - Axicabtagene ciloleucel for treating diffuse large B-cell lymphoma and primary mediastinal large B-cell lymphoma after 2 or more systemic therapies (NICE TA559): RWD was used for estimating the cost of inpatient admission (data: Hospital Episode Statistics), the cost of home care and hospice (data: National Audit Office), and GP time (data: Personal Social Services Research Unit; PSSRU). |
| 22<br>23<br>24<br>25<br>26<br>27<br>28                                         | Resource use (end-of-life care) common          | Whether resource use for estimating end-of-life care is derived from RWD or RCT. Resource use of terminal cancer patients is not frequently reported in the RCT providing the treatment effect. Therefore, other data resources, including RCTs of other technologies, provide the information of resource use in the end-of-life care.                                                                                                                                                                                                                                                                                                                | No RWD = 0<br>Yes, data from RWD = 1<br>Not clear = 9 | N/A**                                                                                                                                                                                                                                                                                                                                                                                                    |
| 29<br>30<br>31<br>32<br>33<br>34                                               | Resource use (Managing AE) intervention         | Whether resource use for managing adverse events of intervention is derived from RWD or RCT. Resource use of managing adverse events is reported in RCTs as well as in other types of researches which can provide alternative perspectives.                                                                                                                                                                                                                                                                                                                                                                                                           | No RWD = 0<br>Yes, data from RWD = 1<br>Not clear = 9 | N/A**                                                                                                                                                                                                                                                                                                                                                                                                    |
| 35<br>36<br>37<br>38<br>39<br>40<br>41<br>42<br>43<br>44<br>45<br>46           | Resource use (volume of treatment) intervention | Whether resource use for volume of treatment of intervention is derived from RWD or RCT. In this study, scope of the volume of treatment is limited to the frequency of treatment, frequency of administration, and amount of subsequent                                                                                                                                                                                                                                                                                                                                                                                                               | No RWD = 0<br>Yes, data from RWD = 1<br>Not clear = 9 | - Fulvestrant for treating untreated locally advanced or metastatic oestrogen-receptor positive breast cancer (NICE TA503): a medical chart review study was used to determine the proportion of patient using subsequent treatment for cost calculation.                                                                                                                                                |

|                                                                                                                                                                                                                                                                                                                                                                                                                                                                                                                                                                                                                                                                                                                                                                             |                                                                                                                                                                                                                                                                                                                                                                            |                                                       |                                                                        |
|-----------------------------------------------------------------------------------------------------------------------------------------------------------------------------------------------------------------------------------------------------------------------------------------------------------------------------------------------------------------------------------------------------------------------------------------------------------------------------------------------------------------------------------------------------------------------------------------------------------------------------------------------------------------------------------------------------------------------------------------------------------------------------|----------------------------------------------------------------------------------------------------------------------------------------------------------------------------------------------------------------------------------------------------------------------------------------------------------------------------------------------------------------------------|-------------------------------------------------------|------------------------------------------------------------------------|
|                                                                                                                                                                                                                                                                                                                                                                                                                                                                                                                                                                                                                                                                                                                                                                             | treatment.                                                                                                                                                                                                                                                                                                                                                                 |                                                       |                                                                        |
| Resource use (Dose adjustment) intervention                                                                                                                                                                                                                                                                                                                                                                                                                                                                                                                                                                                                                                                                                                                                 | Whether resource use for dose adjustment of intervention is derived from RWD or RCT. There are several reasons for adjusting dose such as adverse events (AEs). The dose of cancer treatments is calculated by BSA (body surface area). This study focuses only on BSA and dose adjustment due to AEs, because these information are commonly reported in NICE appraisals. | No RWD = 0<br>Yes, data from RWD = 1<br>Not clear = 9 | N/A**                                                                  |
| Resource use (Managing AE) comparators                                                                                                                                                                                                                                                                                                                                                                                                                                                                                                                                                                                                                                                                                                                                      | Whether resource use for managing adverse events of comparators is derived from RWD or RCT.                                                                                                                                                                                                                                                                                | No RWD = 0<br>Yes, data from RWD = 1<br>Not clear = 9 | N/A**                                                                  |
| Resource use (volume of treatment) comparators                                                                                                                                                                                                                                                                                                                                                                                                                                                                                                                                                                                                                                                                                                                              | Whether resource use for volume of treatment of comparators is derived from RWD or RCT.                                                                                                                                                                                                                                                                                    | No RWD = 0<br>Yes, data from RWD = 1<br>Not clear = 9 | Refer to the variable, resource use (volume of treatment) intervention |
| Resource use (Dose adjustment) comparators                                                                                                                                                                                                                                                                                                                                                                                                                                                                                                                                                                                                                                                                                                                                  | Whether resource use for dose adjustment of comparators is derived from RWD or RCT. Since the intervention is a novel technology, RCTs provide less information on the adjustment. RWD could be utilised to provide more relevant information regarding dose adjustment of existing technologies which have been used in routine clinical practice.                        | No RWD = 0<br>Yes, data from RWD = 1<br>Not clear = 9 | N/A**                                                                  |
| <p>* In order to detect the use of RWD in sensitivity analysis, the parametric part is duplicated.</p> <p>** As data extraction is not conducted, all of examples are not available at this stage. In this case, it marked as N/A.</p> <p>*** Benefits/challenges of the use of RWD are collected in outcome variables.</p> <p>**** In cases where trials have more than two arms, only the arms considered as relevant for decision problem in evidence submission are included. If there are two intervention arms and these arms are separately used for different indications in appraisals, the data extraction is carried out separately. When two arms are relevant as comparators for same indication, the data are recorded without distinguishing these arms.</p> |                                                                                                                                                                                                                                                                                                                                                                            |                                                       |                                                                        |

- Tai TA, Latimer NR, Benedict A, Kiss Z, Nikolaou A. Prevalence of Immature Survival Data for Anti-Cancer Drugs Presented to the National Institute

1  
2  
3  
4  
5  
6  
7  
8  
9  
10  
11  
12  
13  
14  
15  
16  
17  
18  
19  
20  
21  
22  
23  
24  
25  
26  
27  
28  
29  
30  
31  
32  
33  
34  
35  
36  
37  
38  
39  
40  
41  
42  
43  
44  
45  
46

for Health and Care Excellence and Impact on Decision Making. Value Heal. 2020 Dec 8;

For peer review only

# BMJ Open

## A protocol for data extraction: how real-world data have been used in the National Institute for Health and Care Excellence appraisals of cancer therapy

|                                 |                                                                                                                                                                                                                                                                         |
|---------------------------------|-------------------------------------------------------------------------------------------------------------------------------------------------------------------------------------------------------------------------------------------------------------------------|
| Journal:                        | <i>BMJ Open</i>                                                                                                                                                                                                                                                         |
| Manuscript ID                   | bmjopen-2021-055985.R2                                                                                                                                                                                                                                                  |
| Article Type:                   | Protocol                                                                                                                                                                                                                                                                |
| Date Submitted by the Author:   | 13-Dec-2021                                                                                                                                                                                                                                                             |
| Complete List of Authors:       | Kang, Jiyeon; London School of Hygiene and Tropical Medicine Faculty of Public Health and Policy, Department of Health Services Research and Policy;<br>Cairns, John; London School of Hygiene and Tropical Medicine, Department of Health Services Research and Policy |
| <b>Primary Subject Heading</b>: | Health economics                                                                                                                                                                                                                                                        |
| Secondary Subject Heading:      | Health economics                                                                                                                                                                                                                                                        |
| Keywords:                       | ONCOLOGY, HEALTH ECONOMICS, HEALTH SERVICES ADMINISTRATION & MANAGEMENT                                                                                                                                                                                                 |
|                                 |                                                                                                                                                                                                                                                                         |

SCHOLARONE™  
Manuscripts



1  
2  
3  
4 **A protocol for data extraction: how real-world data have been used in the National**  
5  
6  
7 **Institute for Health and Care Excellence appraisals of cancer therapy**

8  
9 Jiyeon Kang<sup>1</sup>, John Cairns<sup>1</sup>

10  
11  
12 <sup>1</sup>Department of Health Service Research and Policy,

13  
14 Faculty of Public Health and Policy,

15  
16  
17 London School of Hygiene and Tropical Medicine, London, UK

18  
19  
20 Corresponding author: Jiyeon Kang ([Jiyeon.Kang@lshtm.ac.uk](mailto:Jiyeon.Kang@lshtm.ac.uk))

21  
22  
23 15-17 Tavistock place, London, WC1H 9SH, UK

24  
25  
26 Word count: 4,705

27  
28  
29 Keywords: Real-world data (RWD), Health Technology assessment (HTA), economic  
30  
31  
32 evaluation, oncology medicine, National Institute for Health and Care Excellence (NICE)

33  
34  
35  
36  
37  
38 **ABSTRACT**

39  
40  
41 **Introduction**

42  
43  
44 Due to the limitations of relying on randomised controlled trials, the potential benefits of real-  
45  
46  
47 world data (RWD) in enriching evidence for health technology assessment (HTA) are  
48  
49  
50 highlighted. Despite increased interest in RWD, there is limited systematic research  
51  
52  
53 investigating how RWD has been used in HTA. The main purpose of this protocol is to extract  
54  
55  
56 relevant data from National Institute for Health and Care Excellence (NICE) appraisals in a  
57  
58  
59 transparent and reproducible manner in order to determine how NICE has incorporated a  
60  
broader range of evidence in the appraisal of oncology medicines.

## Methods and analysis

The appraisals issued between January 2011 to May 2021 are included following inclusion criteria. The data extraction tool newly developed for this research includes the critical components of economic evaluation. The information is extracted from identified appraisals in accordance with extraction rules. The data extraction tool will be validated by a second researcher independently. The extracted data will be analysed quantitatively to investigate to what extent RWD has been used in appraisals. This is the first protocol to enable data to be extracted comprehensively and systematically in order to review the use of RWD.

## Ethics and dissemination

This study is approved by the Ethics Committee of the London School of Hygiene and Tropical Medicine on 14 November 2019 (17315). Results will be published in peer-reviewed journals.

## STRENGTHS AND LIMITATIONS OF THIS STUDY

### Strengths

- This protocol enables data to be extracted in a transparent and systematic manner for the study of how RWD has been used in NICE appraisals including all the different ways an economic evaluation might use RWD.
- This study facilitates systematic understanding of the use of RWD in NICE appraisals over the last 10 years.

### Limitations

- Since it is focussed on cancer, the methods and eventually the findings are to some extent

1  
2  
3  
4 cancer-specific.  
5  
6

7 - The protocol could be modified to reflect the HTA context in different countries although  
8  
9 the extraction protocol is not fully applicable to the practice of other HTA bodies as much of  
10  
11 the protocol reflects the NICE appraisal process.  
12  
13

14  
15 - Since data extraction is based on the four main types of appraisal document it is possible,  
16  
17 but not likely that some relevant information concerning RWD is missed.  
18  
19  
20  
21  
22

## 23 24 **INTRODUCTION**

25  
26  
27 In the last few years, interest in real-world data (RWD) has grown in health care decision-  
28  
29 making (1). Health Technology Assessment (HTA) refers to the systematic evaluation of  
30  
31 clinical- and cost-effectiveness of health technology (2,3). Health technologies include drugs,  
32  
33 medical devices, diagnostics, surgical procedures to mitigate health issues and improve the  
34  
35 quality of life (4). HTA requires valid and reliable information to evaluate such technologies.  
36  
37 Randomised controlled trials (RCTs) have mainly provided the information (5). However, it is  
38  
39 challenging to meet all information needs from RCTs since the new generation of therapies  
40  
41 pose several assessment challenges. For example, when treatment options are expanding  
42  
43 rapidly, it is increasingly unlikely that there are RCTs featuring of all the relevant comparators.  
44  
45 Furthermore, the traditional design of RCTs is possibly less appropriate for new technologies  
46  
47 such as those targeting rare genetic mutations where it is harder to recruit patients from the  
48  
49 clinically relevant populations (6). Moreover, RCTs often have strict inclusion criteria reducing  
50  
51 generalisability (7). Another barrier to obtaining the information required for HTA from RCTs  
52  
53 relates to the extrapolation of survival. Extrapolation is required in order to incorporate the  
54  
55  
56  
57  
58  
59  
60

1  
2  
3  
4 survival data from RCTs in the health economic model (8). It is more challenging to identify  
5  
6 the most appropriate extrapolation the shorter the duration of the trial. If survival data from  
7  
8 RCTs are based on a very limited observation period, the extrapolation of the survival curve  
9  
10 is likely to fail to predict the long-term effect (9).  
11  
12  
13

14 The potential benefits of RWD in enriching evidence for HTA are highlighted by the limitations  
15  
16 of relying on RCTs (10). This research focuses on the use of RWD in HTA by the National  
17  
18 Institute for Health and Care Excellence (NICE). NICE has achieved an international reputation  
19  
20 for rigorous development and application of scientific methods to appraise new health  
21  
22 technologies to provide its decisions with robust and fair justification (11). More importantly,  
23  
24 NICE is noted for the transparency of its processes, responsiveness to change, and  
25  
26 commitment to using the best available evidence (12). The structure of the relevant  
27  
28 documents facilitates identification of the key information and the documents are available  
29  
30 on the NICE website. Therefore, review of these appraisals can provide comprehensive  
31  
32 information on the evidence used for decision-making. In April 2020, NICE signalled its  
33  
34 intention to integrate broader types of data in developing NICE guidance (13). Although it is  
35  
36 primarily a statement of intent, it is not a new development in NICE practice since NICE  
37  
38 already incorporates a diverse range of published scientific evidence when developing its  
39  
40 guidance on health technologies. For example, UK audit data (TA255, 2012), Hospital Episode  
41  
42 Statistics (TA559, 2018) and registry data such as the Edinburgh Ovarian Cancer Database  
43  
44 (TA598, 2019), Surveillance, Epidemiology, and End Result program (TA562, 2019) have been  
45  
46 used in the development of NICE technology appraisal (TA) guidance. While a wide range of  
47  
48 data are already used in NICE guidance, there is limited understanding regarding how and  
49  
50 where RWD has been used, and in which circumstances RWD is accepted as relevant.  
51  
52  
53  
54  
55  
56  
57  
58  
59  
60

1  
2  
3  
4 Research is required to investigate systematically patterns in the use of RWD and to  
5  
6 understand the driving forces behind its use in NICE appraisals.  
7  
8

9  
10 Several researchers have reviewed practice across HTA bodies (14,15) or reported the use of  
11  
12 RWD in HTA (16). However, little systematic research has been conducted. Important  
13  
14 information is missing such as how they included literatures without selection bias, which  
15  
16 parts of the evidence were reviewed, whether they have clearly defined RWD and justified or  
17  
18 explained why this definition is relevant and how different HTA systems were compared given  
19  
20 their different practices. Roberts et al. addressed the potential role of RWD in bridging the  
21  
22 evidence gaps (17). However, they illustrate the use of RWD with a few examples, rather than  
23  
24 providing a fuller picture of current practice when using RWD. Bullement et al. recently  
25  
26 reviewed how RWD informed single technology appraisals of cancer drugs in NICE (18).  
27  
28 Although this study follows a more systematic approach to the review of the use of RWD, a  
29  
30 data extraction table was not provided and the authors focused only on how RWE influenced  
31  
32 the cost-effectiveness analysis, and not on how RWE was used to support or establish the  
33  
34 appraisal. Due to limited information presented concerning the review process in this study,  
35  
36 it is unclear whether the information presented provides a full picture of the use of RWD.  
37  
38 Bullement et al. included 113 STAs issued between April 2011 and October 2018. As interest  
39  
40 in RWD is increasing over time, it may miss relevant information from recent years. This  
41  
42 extraction protocol is required to help extract the data systematically from appraisals, to  
43  
44 increase the reliability of the results of the analysis and to permit a more detailed description  
45  
46 of the use of RWD and analysis of factors influencing its use.  
47  
48  
49  
50  
51  
52  
53  
54

55  
56 A protocol is required to ensure the consistency of data extraction so that the risk of  
57  
58 unsystematic data collection is reduced. The main purpose of this protocol is to extract data  
59  
60

1  
2  
3  
4 from NICE appraisals in a transparent and reproducible manner to answer, “how has NICE  
5 incorporated a broad range of evidence in the appraisal of oncology medicines.” Without  
6 proper justification and operational rules, the data may not be extracted consistently, with a  
7 risk of biasing the analysis. The extracted data are expected to be objective and less biased.  
8  
9 By consolidating these data, subsequent analysis can provide more robust answers to  
10 questions regarding how RWD has been used in NICE technology appraisals. Furthermore,  
11 this protocol facilitates the development of a rich dataset which can highlight not just where  
12 RWD has been used but also what types of evidence have been used in the HTA process in  
13 line with NICE’s interest in incorporating a broad range of evidence. The data can be analysed  
14 to answer several research questions including “how has RWD been used in NICE appraisals”  
15 and “which factors are associated with increased likelihood of the use of RWD” in depth.  
16  
17  
18  
19  
20  
21  
22  
23  
24  
25  
26  
27  
28  
29  
30  
31  
32  
33  
34

## 35 **METHODS AND ANALYSIS**

36  
37  
38 NICE appraisal documents are identified following inclusion criteria (figure 1). The information  
39 is extracted from identified appraisals in accordance with extraction rules. The detailed  
40 extraction rules can be found in supplement 1. The extraction tool includes evidence-related  
41 information such as characteristics of the main clinical evidence and the economic evaluation  
42 model and other information. Using this tool, information will be collected about which parts  
43 of the cost-effectiveness analyses used RWD. Analyses of the intensity of use of RWD and  
44 regression analyses are planned. The data analysis is expected to start from January 2022 and  
45 be completed by December 2022.  
46  
47  
48  
49  
50  
51  
52  
53  
54  
55  
56  
57  
58  
59  
60

## Definition of RWD

A definition of RWD is clearly required before extracting information about the use of RWD in NICE. RWD is an umbrella term which covers broad categories of data. Although RWD is increasingly addressed in the literature, there is no consensus over the definition. One of the commonly used definitions of RWD is that of the US Food and Drug Administration (FDA)(19). Another widely cited study regarding the definition of RWD is Makady et al. (1). Each definition has relatively large operational flexibility to be used for data extraction. For example, companies sometimes present phase 1 clinical trial as RWD. However, these data hardly provide insights in the discussion of the use of RWD in HTA. Requiring data to meet both definitions can help to reduce the discretionary interpretation of RWD. Hence, this study uses a definition combining a category of the study designs of collecting RWD explored by Makady and his colleagues' study and the FDA's definition of RWD focusing on routinely collected data. In this research, RWD is defined as the data relating to patient health status and/or the delivery of health care routinely collected from non-experimental settings.

## Step 1 Appraisal selection

The first step of the research identifies the NICE TA guidance which meets the eligibility criteria. TA guidance are publicly available on the NICE website ([www.nice.org.uk](http://www.nice.org.uk)). This study focuses on four types of appraisal documents, the final scope, the manufacturer's submission, the evidence review group (ERG) report, and the final appraisal determination. These documents are reviewed to establish whether RWD is used to determine any components of the economic evaluation.

## Data sources

This research exclusively includes single-technology appraisals (STA) of oncology medicines. Figure 1 shows the inclusion and exclusion criteria. One aim is to understand how and where RWD has been used in the appraisal process. Therefore, it is necessary that the appraisal process should be identical. However, the STA and multiple technology appraisal (MTA) processes differ substantially. The MTA has different format of appraisal documents to assess several drugs or treatments used for one or more condition. It is challenging to gather the same information in the MTA process as different actors are responsible for producing and reviewing the main pieces of evidence (20). Besides, STAs are the predominant form in practice, 93% of appraisals of oncology. The small number of the MTAs, only eighteen oncology appraisals, limits the scope for a comparison of MTAs and STAs in terms of the use of RWD. Therefore, this study focuses on STAs, which assess a single treatment. It also limits analysis to appraisals published between January 2011 and May 2021 in order to have a long enough time period to capture potential changes over time in how RWD has been used but also recognising that STAs from earlier years might be of less interest because enthusiasm for RWD was largely absent. Here, the date when guidance was published refers to the date of issuing the final appraisal determination document (FAD) which can be regarded as an end point of the evidence synthesis process (in the absence of a successful appeal).

## Operational separation

Following the inclusion and exclusion criteria, appraisals are identified. Among these appraisals, some TAs have more than one clinical indication or involve combination therapy. It is possible that different evidence was used for the different patient populations in the



1  
2  
3  
4 appraisal. Hence, these appraisals are separated by clinical conditions or treatment lines and  
5  
6 reviewed in order to avoid losing information. For example, olaparib for maintenance  
7  
8 treatment of relapsed platinum-sensitive ovarian, fallopian tube or peritoneal cancer (NICE  
9  
10 TA620) has two separate recommendations for different indications. While a patient who has  
11  
12 a BRCA1 or BRCA2 mutation and has had three or more courses of platinum-based  
13  
14 chemotherapy is eligible for the treatment, a patient who has a BRCA1 or BRCA2 mutation  
15  
16 and has had two courses of platinum-based chemotherapy is able to use the treatment within  
17  
18 Cancer Drug Fund. Consequently, these indications are included separately in the analysis.  
19  
20  
21  
22  
23  
24  
25  
26

## 27 **Step 2: Data extraction**

28  
29  
30 A detailed protocol is developed to guide the extraction of essential data for each appraisal  
31  
32 in order to investigate the use of RWD in NICE technology appraisals in a systematic and  
33  
34 reproducible manner. The protocol is designed to extract information from both the  
35  
36 manufacturer's submission (manufacturer's cost-effectiveness analysis) and the final  
37  
38 appraisal document (the model preferred by the committee) regarding where RWD was used,  
39  
40 and to determine the extent to which the committee supported the use of RWD in these  
41  
42 appraisals and understand what factors are associated with supporting or not supporting their  
43  
44 use. Figure 2 shows the structure of the data extraction template. In summary, the extraction  
45  
46 tool consists of three parts – general information, explanatory variables, and outcome  
47  
48 variables. The outcome of interest being the use of RWD. The outcome variables record use  
49  
50 or non-use of RWD for different elements of the economic evaluation. The information in the  
51  
52 base-case analysis and sensitivity analyses will separately extracted. The tool includes all  
53  
54 important elements of an economic evaluation. The study will analyse the data to investigate  
55  
56  
57  
58  
59  
60

1  
2  
3  
4 patterns in the use of RWD in NICE appraisals, and the association between several factors  
5  
6 and the use of RWD. Explanatory variables are suggested based on the hypotheses presented  
7  
8 under Step 4: data analysis. All items in the extraction template and how to code them are  
9  
10 described in the glossary (supplement 1). To convey the type of information to be extracted,  
11  
12 some examples from a preparatory review are presented in the glossary.  
13  
14  
15  
16  
17  
18  
19

#### 20 Parametric and non-parametric use 21

22  
23 This protocol distinguishes two categories of outcome variable, parametric and non-  
24  
25 parametric use of RWD. Parametric use of RWD is the use of such data to define the numerical  
26  
27 value of a specific variable in the economic evaluation, whereas non-parametric use is where  
28  
29 data are utilised to develop the model structure or to determine the scope of the evaluation.  
30  
31 For example, when RWD are used to estimate survival, this will be counted as parametric use  
32  
33 with respect to clinical outcomes (OS/PFS). Parametric use is reviewed and recorded for the  
34  
35 intervention and comparators separately as different data could be used in the cost-  
36  
37 effectiveness analysis. An example of non-parametric use of RWD can be found in the  
38  
39 appraisal of palbociclib for previously untreated, hormone receptor-positive, HER2-negative,  
40  
41 locally advanced or metastatic breast cancer (NICE TA495). In this appraisal, the company  
42  
43 used information from a study of medical records to determine the subsequent treatments  
44  
45 to be assumed in the economic model. This case is regarded as non-parametric use since RWD  
46  
47 was used to specify the treatment sequence but not the quantity and cost of subsequent  
48  
49 treatment.  
50  
51  
52  
53  
54  
55  
56  
57

58 Parametric and non-parametric use of RWD and the different categories shown in figure 2,  
59  
60

1  
2  
3  
4 facilitate more consistent data extraction by highlighting the different ways RWD might be  
5  
6 used, and provide greater flexibility when testing hypotheses regarding the use of RWD, and  
7  
8 the exploration of ways to measure the intensity of use of RWD.  
9  
10

## 11 12 Coding

13  
14  
15 A key issue with respect to improving the reliability of data extraction is how many distinct  
16  
17 variables to identify and how finely to divide are the potential responses to these variables.  
18  
19 One option, in order not to lose information, is to have many distinct variables with binary  
20  
21 responses. Another option is to merge many variables but have multi-level responses. This  
22  
23 coding system has advantages which include avoiding information loss, and also grouping  
24  
25 together 'similar' information used during appraisals to establish patterns of the use of RWD.  
26  
27 This is closely linked to the reason for not using multiple responses in the coding. The  
28  
29 template takes an "including all and combining trivia" approach. It helps to include all relevant  
30  
31 variables where RWD data can potentially be used, but also to list variables more concisely by  
32  
33 merging unnecessarily trivial variables so that the outcome of the extraction can be  
34  
35 concretely analysed. Based on two categories, the parametric and non-parametric use of  
36  
37 RWD, the areas where data are likely to be used are carefully searched. As a backbone of the  
38  
39 extraction structure, distinguishing two categories helped to search each component  
40  
41 systematically. Under parametric use, clinical effectiveness, health utility and cost and  
42  
43 healthcare resource use were thoroughly reviewed. After sorting variables, they were  
44  
45 aggregated if the information is minor and can be categorised into one variable. The area  
46  
47 where aggregation is mostly required is resource use. In order to reflect routine clinical  
48  
49 practice, especially the cost part has naturally incorporated RWD into the analysis. Estimates  
50  
51 of unit costs are usually informed by NHS reference costs (a form of RWD) and thus in order  
52  
53  
54  
55  
56  
57  
58  
59  
60

1  
2  
3  
4 to provide a more sensitive measure of the use of RWD the extraction template focuses on  
5  
6 resource use (with respect to cost). However, the measures of resource use are not fully  
7  
8 differentiated. Different health technologies include different elements of resource use  
9  
10 reflecting their characteristics. Distinguishing all resource use is not an accurate way to  
11  
12 understand why and how RWD was used. Although all individual resource uses are not  
13  
14 identified, some resource uses, which can be critical in appraisals are differentiated. Variables  
15  
16 such as volume of treatment or dose adjustment have potentially critical impacts on the result  
17  
18 of economic evaluation. Therefore, these variables are separated from overall resource use.  
19  
20  
21  
22  
23

### 24 **Step 3: Validation of data extraction tool**

25  
26  
27 The data extraction tool will be validated by a second researcher independently repeating the  
28  
29 data extraction for a random sample of appraisals (20% of all appraisals). This validation is  
30  
31 required to check the replicability of the data extraction and the clarity of the extraction tool.  
32  
33 Any disagreements between the researchers will be resolved by discussion. Peer discussion  
34  
35 following the validation process is important not only to check the clarity of this protocol but  
36  
37 also to investigate any deviations caused by unclear information. It will help pinpoint where  
38  
39 a higher degree of subjectivity may arise in the data extraction.  
40  
41  
42  
43  
44

### 45 **Step 4: Data analysis**

46  
47  
48 The extracted data will be analysed quantitatively in two different ways. First, counts and  
49  
50 proportions will summarise where and how RWD has been used in appraisals. This will be  
51  
52 supplemented by an analysis of the intensity of use of RWD in order to explore changes in the  
53  
54 pattern of use of RWD over time and differences with respect to cancer type. In addition to  
55  
56 descriptive statistics, the association between years and the intensity of use of RWD will be  
57  
58  
59  
60

1  
2  
3  
4 examined. Secondly, a regression analysis will be performed to investigate which factors are  
5  
6 associated with the greater use of RWD in a company's submission. As part of the protocol  
7  
8 development, some appraisal documents were reviewed to identify factors potentially  
9  
10 associated with the use of RWD. Five factors were identified and formulated into hypotheses  
11  
12 about increased use of RWD (Figure 3).  
13  
14  
15  
16  
17  
18  
19

### 20 **Methodological issues**

21  
22  
23 The design of this data extraction protocol, in which information is reliably and repeatedly  
24  
25 extracted across appraisals, will allow us to review evidence for the use of RWD more  
26  
27 systematically than could be obtained from conducting several case studies. However, several  
28  
29 methodological challenges can be anticipated. This section addresses these challenges and  
30  
31 how they might be mitigated.  
32  
33  
34  
35

#### 36 **Issue 1: Unclearly stated information**

37  
38  
39 Overall, NICE appraisals clearly describe the data used in the evidence synthesis. However,  
40  
41 sometimes the search process may not be well-documented and the precise source of  
42  
43 information may not be clear. Systematic literature reviews are carried out to identify all  
44  
45 relevant evidence in appraisals. Clinical effectiveness evidence is carefully examined and  
46  
47 described in detail, with clear reasons for the inclusion and exclusion of studies. On the other  
48  
49 hand, the systematic search for resource use and cost information usually enumerates  
50  
51 miscellaneous studies with bibliographic information and a summary, but the critical review  
52  
53 of minor components of health cost is sometimes missing. While manufacturers provide the  
54  
55 result of their assessments, some manufacturers' submissions do not clearly state whether a  
56  
57  
58  
59  
60

1  
2  
3  
4 particular study was used to determine an element of resource use making up the health state  
5  
6 costs. However, it appears to be rare for there not be an explicit statement regarding the  
7  
8 evidence used, mostly with respect to resource use.  
9  
10

#### 11 12 Issue 2: Level of aggregation 13

14  
15 An important question is the most appropriate level of aggregation. This is best illustrated  
16  
17 with respect to healthcare costs. It would be possible to have a variable indicating use or non-  
18  
19 use of RWD for every single element of cost (distinguishing GP visits, frequency of  
20  
21 hospitalisation, and so on). At the opposite extreme there could be a single cost variable  
22  
23 which indicated whether RWD was used for any element of cost. The more aggregated the  
24  
25 measure the greater the loss of information, but some elements of cost are much more  
26  
27 important than others and the potential analyses of the use of RWD will multiply greatly if  
28  
29 there is no attempt at aggregation. The current protocol tries to balance the advantages and  
30  
31 disadvantages of different levels of aggregation by combining several elements into a health  
32  
33 state cost variable but distinguishing other important components of cost, such as volume of  
34  
35 treatment, dose adjustment and resource use for adverse events.  
36  
37  
38  
39  
40  
41  
42

#### 43 Issue 3: No consensus on the definition of RWD. 44

45  
46 This research uses a definition of RWD merging definitions from the FDA and Makady et al.  
47  
48 The distinctive part of the definition used in this research is 'routinely collected' data from a  
49  
50 'non-experimental study'. Although this definition provides a specific and clear definition for  
51  
52 this research, there is no consensus on the best definition of RWD. Even the same definition  
53  
54 can be interpreted in different ways. For example, some researchers interpret that 'routinely  
55  
56 collected' in the FDA definition is 'collected in routine care' whereas other interpret it as 'how  
57  
58  
59  
60

1  
2  
3  
4 frequently data are collected.’ It is likely that other definitions of RWD are preferred by other  
5  
6 researchers and the data extracted will be influenced by the definition of RWD chosen. While  
7  
8 the use of multiple definitions of RWD was considered, it would create practical problems  
9  
10 such as multiplying the number of potential analyses and making data extraction take longer.  
11  
12 Although the chosen definition can be questioned by other researchers who have different  
13  
14 views, the various definitions overlap considerably. It is thus unlikely there will be a marked  
15  
16 divergence in the data extracted when using the different definitions.  
17  
18  
19  
20  
21

### 22 Design to mitigate methodological issues

23  
24  
25 Several operational rules have been designed to minimise bias likely to come from the  
26  
27 methodological issues encountered in the data extraction. First, ‘not clear’ is recorded  
28  
29 separately in order to provide a more accurate description of the use of RWD. However, for  
30  
31 purposes of data analysis, we anticipate treating these instance as “no RWD” since the code  
32  
33 ‘not clear’ cannot be independently analysed. In addition, having a ‘not clear’ category in  
34  
35 analysis is unlikely to improve data quality since we anticipate that this problem will arise in  
36  
37 very few appraisals. Also, information which is not clearly recorded in the appraisal  
38  
39 documents is usually not important information with respect to the evidence synthesis. The  
40  
41 approach (extracting all relevant information which can provide meaningful data for analyses)  
42  
43 is also closely linked to the reason for using binary code for analysis in this research.  
44  
45 Decomposing levels of codes into several small parts can facilitate data extraction. However,  
46  
47 it is more likely to increase the complexity since trivial information is individually recorded.  
48  
49 The extracted trivial data should be interpreted based on another operational rule. It is  
50  
51 subject to increased error, particularly when testing hypotheses. For these reasons, the  
52  
53 benefit of using multi-level codes does not outweigh the benefit of binary codes while  
54  
55  
56  
57  
58  
59  
60

1  
2  
3  
4 separation is much more time consuming. Instead of adapting multilevel codes, this study will  
5  
6 adopt an alternative approach, an intensity analysis which helps to identify important  
7  
8 differences within the diverse patterns of use of RWD. When looking at the pattern of use of  
9  
10 RWD, the intensity of use will be analysed. Simply counting the number of times RWD are  
11  
12 used is not an accurate way to understand why and how RWD were used. Alternatively, this  
13  
14 study focuses on variables which are potentially important determinants of cost-effectiveness  
15  
16 in appraisal. Variables such as survival outcome, volume of treatment and choice of  
17  
18 comparators are more likely to influence estimated cost-effectiveness. Especially, the survival  
19  
20 outcome is the most important information in both clinical and cost-effectiveness as well as  
21  
22 one of the controversial areas where to use RWD. The intensity analysis is a framework to  
23  
24 show whether RWD is used in these components alongside the quantity of the use of RWD. It  
25  
26 can offer more benefits in deeper understanding of the use of RWD than counting all  
27  
28 miscellaneous uses of RWD.  
29  
30  
31  
32  
33  
34  
35  
36  
37  
38  
39

#### 40 **STRENGTHS AND LIMITATIONS**

41  
42 To the best of the authors' knowledge, this is the first study protocol to investigate to what  
43  
44 extent RWD has been used in NICE appraisals. It allows the practice of extracting information  
45  
46 to be reproducible, systematic and transparent. Strengthening the reproducibility and  
47  
48 transparency of data extraction can maximise understanding of the use of RWD by allowing  
49  
50 more accurate interpretation and use of findings. This protocol could be relevant to  
51  
52 researchers or HTA agencies who aim to understand how various data resources are used in  
53  
54 HTA in England. Analysis of data generated using this protocol can provide a detailed picture  
55  
56 of the use of RWD in NICE appraisals over ten years. Moreover, the study findings could add  
57  
58  
59  
60



1  
2  
3  
4 value to NICE's ongoing work to broaden the evidence used in appraisals.  
5  
6

7 The protocol has the limitation that it has been developed to study the use of RWD in NICE  
8 appraisals of oncology drugs. Consequently, the data extraction protocol may not be fully  
9 applicable to appraisals in other disease areas or to the different practice of other HTA bodies.  
10 Since the documentation is significantly different depending on each country's context, it may  
11 not be feasible to extract the same information as in the English context. However, many of  
12 the distinctions are of wider application, e.g. parametric vs non-parametric use of RWD, and  
13 the taxonomy of where in an economic evaluation it might be relevant to look for use of RWD.  
14 Also, the hypotheses are potentially of wider application. The results are going to be specific  
15 to NICE but otherwise the structure of this research has wider application. Although not fully  
16 transferrable, this protocol can be modified for use in other HTA contexts. Lastly, this protocol  
17 focuses on four main documents. Relevant RWD may arise at the clarification or technical  
18 engagement stage. It is possible there is some information regarding use of RWD that is not  
19 reported in any of the four main documents. However, only a small number of such cases are  
20 anticipated. If RWD is critically used in a revised model and the committee thinks it is an  
21 important change, this evidence is likely to be addressed in FAD.  
22  
23  
24  
25  
26  
27  
28  
29  
30  
31  
32  
33  
34  
35  
36  
37  
38  
39  
40  
41  
42  
43  
44  
45  
46  
47

#### 48 **Ethics and dissemination**

49  
50  
51 This study was approved by the Ethics Committee of the London School of Hygiene and  
52 Tropical Medicine on 14 November 2019 (17315). Results will be published in peer-reviewed  
53 journals.  
54  
55  
56  
57  
58  
59  
60

## **PATIENT AND PUBLIC INVOLVEMENT**

None.

## **ACKNOWLEDGEMENTS**

The authors thank David Lugo-Palacios for useful advice on the clarity of data extraction and the validation process.

## **CONTRIBUTORS**

Both authors contributed to conceptualising and designing the study. JK drafted the protocol manuscript. JC revised the manuscript for important intellectual content and contributed to the methodology.

## **FUNDING STATEMENT**

JK is supported by the Centre for Cancer Biomarkers, University of Bergen funded by the Research Council of Norway grant number (223250). The funder was not involved in the design of the protocol or the decision to submit the protocol for publication, nor will they be involved in any aspect of the study conduct.

## **COMPETING INTEREST STATEMENT**

None declared.

**FULL REFERENCES**

1. Makady A, de Boer A, Hillege H, Klungel O, Goettsch W. What Is Real-World Data? A Review of Definitions Based on Literature and Stakeholder Interviews. *Value Heal* [Internet]. 2017;20(7):858–65. Available from: <http://dx.doi.org/10.1016/j.jval.2017.03.008>
2. WHO. WHO | HTA Definitions. WHO [Internet]. 2015 [cited 2019 May 13]; Available from: <https://www.who.int/health-technology-assessment/about/Defining/en/>
3. York Health Economics Consortium. Health Technology Assessment (online) [Internet]. 2016 [cited 2021 Oct 4]. Available from: <https://yhec.co.uk/glossary/health-technology-assessment/>
4. Health technologies. 2021 Dec 10 [cited 2021 Dec 10]; Available from: <https://www.euro.who.int/en/health-topics/Health-systems/health-technologies-and-medicines/health-technologies>
5. Chan K, Nam S, Evans B, Deoliveira C, Chambers A, Gavura S, et al. Developing a framework to incorporate real-world evidence in cancer drug funding decisions: The Canadian Real-world Evidence for Value of Cancer Drugs (CanREValue) collaboration. *BMJ Open*. 2020 Jan 7;10(1).
6. Hilgers R. Design and analysis of clinical trials for small rare disease populations. *J Rare Dis Res Treat*. 2016 Nov 1;1(3):53–60.
7. Averitt AJ, Weng C, Ryan P, Perotte A. Translating evidence into practice: eligibility

- 1  
2  
3  
4 criteria fail to eliminate clinically significant differences between real-world and study  
5  
6 populations. *npj Digit Med* 2020 31 [Internet]. 2020 May 11 [cited 2021 Oct 5];3(1):1–  
7  
8 10. Available from: <https://www.nature.com/articles/s41746-020-0277-8>  
9  
10  
11  
12 8. Latimer N. Survival Analysis For Economic Evaluations Alongside Clinical Trials -  
13  
14 Extrapolation with Patient-Level Data - PubMed - NCBI. *Med Decis Mak* [Internet]. 2013  
15  
16 [cited 2019 May 14];33(6):743–54. Available from:  
17  
18 <https://www.ncbi.nlm.nih.gov/pubmed/27905716>  
19  
20  
21  
22 9. Davies C, Briggs A, Lorgelly P, Garellick G, Malchau H. The “hazards” of extrapolating  
23  
24 survival curves. *Med Decis Mak* [Internet]. 2013 Apr [cited 2020 Aug 17];33(3):369–80.  
25  
26 Available from: <https://pubmed.ncbi.nlm.nih.gov/23457025/>  
27  
28  
29  
30 10. Katkade VB, Sanders KN, Zou KH. Real world data: An opportunity to supplement  
31  
32 existing evidence for the use of long-established medicines in health care decision  
33  
34 making. *J Multidiscip Healthc*. 2018;11:295–304.  
35  
36  
37  
38 11. Littlejohns P, Chalkidou K, Culyer AJ, Weale A, Rid A, Kieslich K, et al. National Institute  
39  
40 for Health and Care Excellence, social values and healthcare priority setting [Internet].  
41  
42 Vol. 112, *Journal of the Royal Society of Medicine*. SAGE Publications Ltd; 2019 [cited  
43  
44 2021 May 11]. p. 173–9. Available from:  
45  
46 <https://journals.sagepub.com/doi/full/10.1177/0141076819842846>  
47  
48  
49  
50  
51 12. Schlander M. Health Technology Assessments by the National Institute for Health and  
52  
53 Clinical Excellence. *Health Technology Assessments by the National Institute for Health  
54  
55 and Clinical Excellence*. Springer New York; 2007.  
56  
57  
58  
59 13. Broader types of data to be used in development of NICE guidance | News and features  
60

- 1  
2  
3  
4 | News | NICE [Internet]. [cited 2020 May 5]. Available from:  
5  
6 [https://www.nice.org.uk/news/article/broader-types-of-data-to-be-used-in-](https://www.nice.org.uk/news/article/broader-types-of-data-to-be-used-in-development-of-nice-guidance)  
7  
8 development-of-nice-guidance  
9  
10  
11  
12 14. Wang S, Goring SM, Lozano-Ortega G. Inclusion of real-world evidence in submission  
13  
14 packages to health technology assessment bodies: What do current guidelines indicate?  
15  
16 Value Heal [Internet]. 2016 May 1 [cited 2020 Jun 22];19(3):A287. Available from:  
17  
18 <http://www.valueinhealthjournal.com/article/S1098301516008317/fulltext>  
19  
20  
21  
22 15. Pietri G, Masoura P. Market Access and Reimbursement: The Increasing Role of Real-  
23  
24 World Evidence. Value Heal [Internet]. 2014 Nov 1 [cited 2020 Jun 22];17(7):A450–1.  
25  
26 Available from:  
27  
28 <http://www.valueinhealthjournal.com/article/S1098301514031465/fulltext>  
29  
30  
31  
32 16. Harwood M, Deighton A, Mickle A, Qian C, Szabo S. The use of real-world data in health  
33  
34 technology assessment of medications for rare diseases. Value Heal [Internet]. 2019  
35  
36 Nov 1 [cited 2020 Sep 10];22:S863. Available from:  
37  
38 <http://www.valueinhealthjournal.com/article/S1098301519348296/fulltext>  
39  
40  
41  
42 17. Roberts MH, Ferguson GT. Real-World Evidence: Bridging Gaps in Evidence to Guide  
43  
44 Payer Decisions. PharmacoEconomics - Open [Internet]. 2021 Mar 18 [cited 2021 Jun  
45  
46 29];5(1):3–11. Available from: <https://doi.org/10.1007/s41669-020-00221-y>  
47  
48  
49  
50  
51 18. Bullement A, Podkonjak T, Robinson MJ, Benson E, Selby R, Hatzwell AJ, et al. Real-  
52  
53 world evidence use in assessments of cancer drugs by NICE. Int J Technol Assess Health  
54  
55 Care [Internet]. 2020 Aug 1 [cited 2021 May 12];36(4):388–94. Available from:  
56  
57 <https://doi.org/10.1017/S0266462320000434>  
58  
59  
60

- 1  
2  
3  
4 19. FDA. Real-World Evidence [Internet]. 2020 [cited 2020 May 6]. Available from:  
5  
6 <https://www.fda.gov/science-research/science-and-research-special-topics/real->  
7  
8 [world-evidence](https://www.fda.gov/science-research/science-and-research-special-topics/real-)  
9  
10  
11  
12 20. Guide to the multiple technology appraisal process [Internet]. [cited 2020 Aug 7].  
13  
14 Available from: [www.nice.org.uk](http://www.nice.org.uk)  
15  
16  
17  
18  
19  
20  
21  
22  
23  
24  
25  
26  
27  
28  
29  
30  
31  
32  
33  
34  
35  
36  
37  
38  
39  
40  
41  
42  
43  
44  
45  
46  
47  
48  
49  
50  
51  
52  
53  
54  
55  
56  
57  
58  
59  
60

For peer review only

1  
2  
3 **Figure Legends**  
4

5  
6 Figure 1 Inclusion/exclusion criteria  
7

8  
9 Figure 2 The framework for data extraction  
10

11  
12 Figure 3 Hypotheses about increased use of RWD  
13  
14  
15  
16  
17

18  
19 **Supplement Legends**  
20

21  
22 Supplement 1 Glossary of variables in extraction template  
23  
24  
25  
26  
27  
28  
29  
30  
31  
32  
33  
34  
35  
36  
37  
38  
39  
40  
41  
42  
43  
44  
45  
46  
47  
48  
49  
50  
51  
52  
53  
54  
55  
56  
57  
58  
59  
60

|                                                                                                                       |
|-----------------------------------------------------------------------------------------------------------------------|
| Inclusion criteria                                                                                                    |
| - STA of oncology medicine                                                                                            |
| - Appraisals issued from January 2011 to May 2021                                                                     |
| Exclusion criteria                                                                                                    |
| - Appraisal of technology for preventing the complications of cancer                                                  |
| - Appraisal of surgical practice and other therapeutic therapies                                                      |
| - Appraisals for which evidence is not available (withdrawn appraisals) or was never supplied (terminated appraisals) |

Figure 1 Inclusion/exclusion criteria

131x35mm (240 x 240 DPI)



1  
2  
3  
4  
5  
6  
7  
8  
9  
10  
11  
12  
13  
14  
15  
16  
17  
18  
19  
20  
21  
22  
23  
24  
25  
26  
27  
28  
29  
30  
31  
32  
33  
34  
35  
36  
37  
38  
39  
40  
41  
42  
43  
44  
45  
46  
47  
48  
49  
50  
51  
52  
53  
54  
55  
56  
57  
58  
59  
60

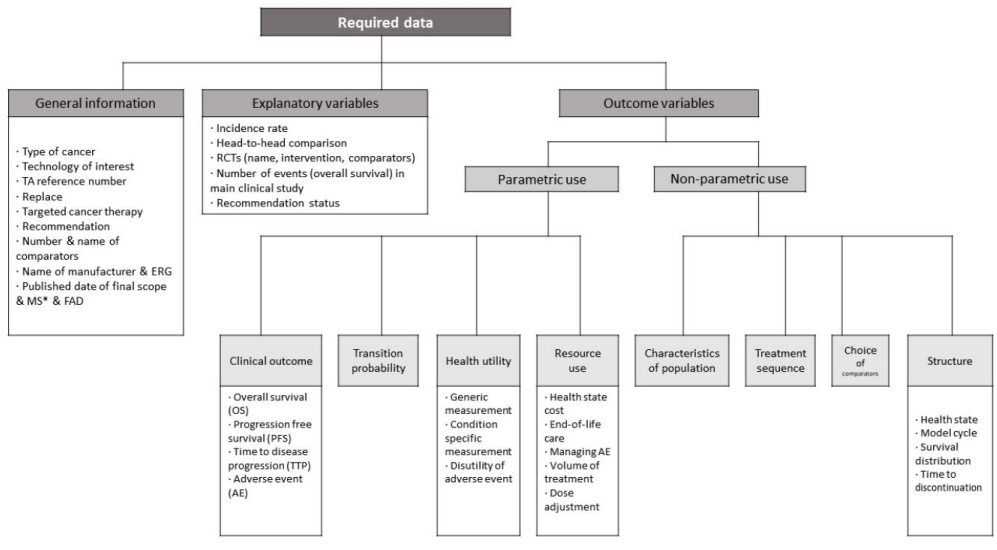

\* Published date of MS: the date when it was submitted by the manufacturer, which is stated on manufacturer submission document

Figure 2 The framework for data extraction

141x84mm (240 x 240 DPI)

- 1) Poor internal/external validity of the clinical trial is associated with greater use of RWD.
- 2) Absence of direct (head-to-head) comparison is associated with greater use of RWD.
- 3) Low incidence rate of the disease is associated with greater use of RWD.
- 4) Immature survival data in the clinical trial are associated with greater use of RWD.
- 5) The technology having been recommended in previous NICE TA guidance is associated with greater use of RWD.

Figure 3 Hypotheses about increased use of RWD

93x24mm (240 x 240 DPI)

Figure 1 Inclusion/exclusion criteria

|                                                                                                                       |
|-----------------------------------------------------------------------------------------------------------------------|
| Inclusion criteria                                                                                                    |
| - STA of oncology medicine                                                                                            |
| - Appraisals issued from January 2011 to May 2021                                                                     |
| Exclusion criteria                                                                                                    |
| - Appraisal of technology for preventing the complications of cancer                                                  |
| - Appraisal of surgical practice and other therapeutic therapies                                                      |
| - Appraisals for which evidence is not available (withdrawn appraisals) or was never supplied (terminated appraisals) |

Figure 2 The framework for data extraction

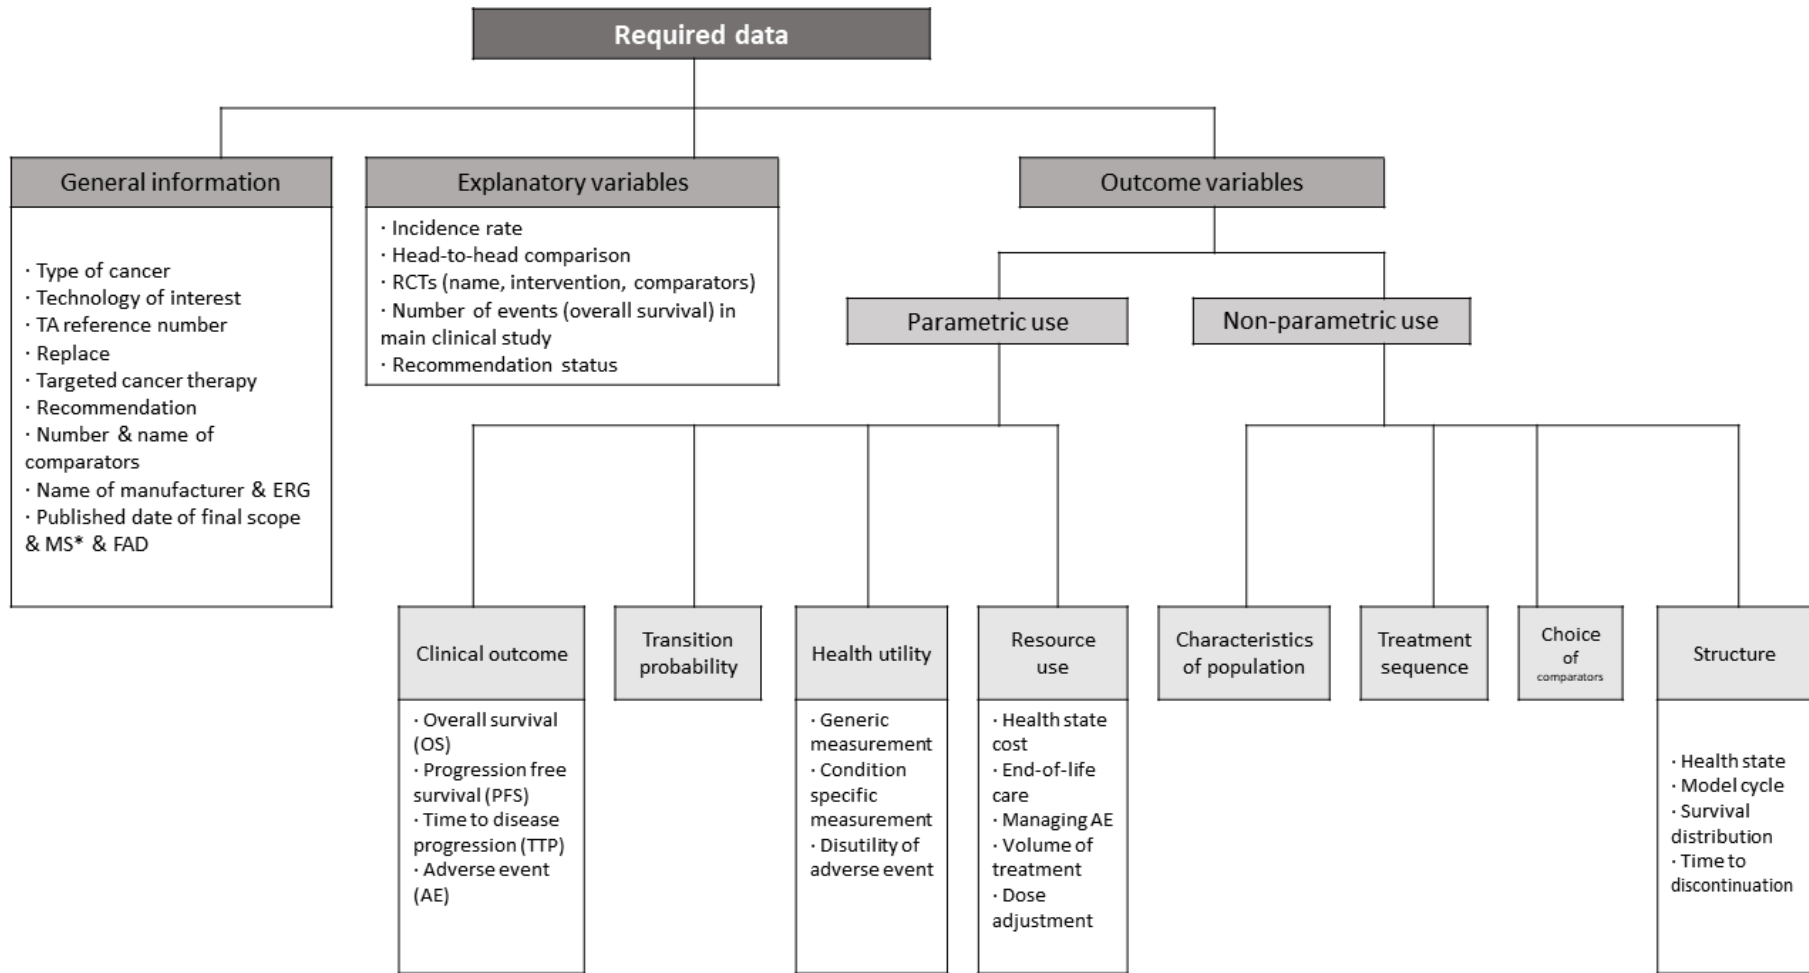

\* Published date of MS: the date when it was submitted by the manufacturer, which is stated on manufacturer submission document

**Figure 3 Hypotheses about increased use of RWD**

- 1) Poor internal/external validity of the clinical trial is associated with greater use of RWD.
- 2) Absence of direct (head-to-head) comparison is associated with greater use of RWD.
- 3) Low incidence rate of the disease is associated with greater use of RWD.
- 4) Immature survival data in the clinical trial are associated with greater use of RWD.
- 5) The technology having been recommended in previous NICE TA guidance is associated with greater use of RWD.

For peer review only

## Supplement 1 Glossary of variables in extraction template

| General information            |                                                                                                                                                                                                                                                                                                                                                                                                                                                                              |                                                                                                                                                                                                                                       |
|--------------------------------|------------------------------------------------------------------------------------------------------------------------------------------------------------------------------------------------------------------------------------------------------------------------------------------------------------------------------------------------------------------------------------------------------------------------------------------------------------------------------|---------------------------------------------------------------------------------------------------------------------------------------------------------------------------------------------------------------------------------------|
| Variable                       | Explanation                                                                                                                                                                                                                                                                                                                                                                                                                                                                  | Coding                                                                                                                                                                                                                                |
| Type of cancer                 | The NICE classification of the cancer<br>(website: <a href="https://www.nice.org.uk/guidance/conditions-and-diseases/cancer">https://www.nice.org.uk/guidance/conditions-and-diseases/cancer</a> )                                                                                                                                                                                                                                                                           | Bladder cancer=1, Blood and bone marrow cancer =2, Breast cancer=3, Colorectal=4, Neuroblastoma=5, Head and neck=6, Liver=7, Lung=8, Oesophageal=9, Ovarian=10, Pancreatic=11, Prostate=12, Renal=13, Skin=14, Stomach=15, Sarcoma=16 |
| Technology of interest         | The name of drug in the current appraisal. If it is combination therapy, the key technology which manufacturer focuses on will be taken here.                                                                                                                                                                                                                                                                                                                                | Narrative description                                                                                                                                                                                                                 |
| Indication                     | Clinical indications which are addressed in Final Appraisal Determination (FAD) document                                                                                                                                                                                                                                                                                                                                                                                     | Narrative description                                                                                                                                                                                                                 |
| TA number                      | the reference number of the technology guidance                                                                                                                                                                                                                                                                                                                                                                                                                              | Narrative description                                                                                                                                                                                                                 |
| Replace                        | Whether TA guidance has replaced or not. Appraisals can be replaced after rapid reviews/reviews/updates of previous appraisals or CDF reviews. Regardless of reasons of replacement, TA reference number which is replaced by this appraisal of interest will be recorded.                                                                                                                                                                                                   | None= 0<br>If current appraisal replaces previous appraisal, the replaced TA reference number is recorded here.                                                                                                                       |
| • Pre-2016 CDF reconsideration | Before April 2016, the drug which was not reviewed or not recommended for routine commissioning by NICE can be used using the previous model of CDF. When new CDF was introduced in April 2016, these drugs in the old CDF were appraised by NICE to transit the model of CDF. This variable describe whether the appraisal of interest is an appraisal of the CDF reconsideration for the drug used in the old model of CDF before 2016.                                    | No, it is not pre-2016 CDF reconsideration =0<br>Yes, it is a appraisal of pre-2016 CDF reconsideration =1                                                                                                                            |
| • 2016 CDF review              | In April 2016, a new model of CDF was introduced. In the new model, an additional recommendation, recommended for use within the CDF is available when NICE appraising cancer drugs. The drug available via the CDF has to collect the data for further review for the routine commissioning after a certain period. As this mandated data collection can impact on the use of RWD, this variable allows to distinguish the appraisals, which RWD is more likely to be used. | No, it is not 2016 CDF review =0<br>Yes, it is 2016 CF review=1                                                                                                                                                                       |
| Targeted cancer therapy        | Treatment that uses drugs or other substances to identify and attack specific types of cancer cells                                                                                                                                                                                                                                                                                                                                                                          | Non-targeted therapy = 0, targeted therapy = 1, not sure = Narrative description                                                                                                                                                      |

|                                |                                                                                                                                                                                                                                                                                                                                                                                                                                                                                                                                                                                                    |                                                                                                                  |
|--------------------------------|----------------------------------------------------------------------------------------------------------------------------------------------------------------------------------------------------------------------------------------------------------------------------------------------------------------------------------------------------------------------------------------------------------------------------------------------------------------------------------------------------------------------------------------------------------------------------------------------------|------------------------------------------------------------------------------------------------------------------|
| Recommendation                 | <p>the classification of recommendations made by the NICE committee in FAD document</p> <ul style="list-style-type: none"> <li>- Not recommended: 0</li> <li>- Recommended (in line with marketing authorisation): 1</li> <li>- Recommended (in line with marketing authorisation) in CDF:2</li> <li>- Optimised: 3</li> <li>- Optimised in CDF: 4</li> <li>- Recommended in research: 5</li> </ul>                                                                                                                                                                                                | Not recommended=0, recommended=1, recommended (cdf)=2, optimised=3, optimised (cdf)=4, recommended in research=5 |
| number of comparators          | Count the number of comparators in each manufacturer submission or FAD document. The information in manufacturer submission and FAD is recorded in the separated rows (manufacturer row/committee row).                                                                                                                                                                                                                                                                                                                                                                                            | Number in the manufacturer's submission                                                                          |
| name of comparators            | Record the name of comparators in manufacturer submission or FAD document                                                                                                                                                                                                                                                                                                                                                                                                                                                                                                                          | Narrative description                                                                                            |
| name of manufacturer           | the name of manufacturer in manufacturer submission                                                                                                                                                                                                                                                                                                                                                                                                                                                                                                                                                | Narrative description                                                                                            |
| name of the ERG                | the name of the ERG (evidence review group)/AG (assessment group) in ERG critiques or AG reports                                                                                                                                                                                                                                                                                                                                                                                                                                                                                                   | Narrative description                                                                                            |
| published date of final scope  | the date of final scope as MM/YYYY                                                                                                                                                                                                                                                                                                                                                                                                                                                                                                                                                                 | Date (MM/YYYY)                                                                                                   |
| published date of manufacturer | the date of manufacturer submission as MM/YYYY.                                                                                                                                                                                                                                                                                                                                                                                                                                                                                                                                                    | Date (MM/YYYY)                                                                                                   |
| published date of FAD guidance | the date of FAD document as MM/YYYY                                                                                                                                                                                                                                                                                                                                                                                                                                                                                                                                                                | Date (MM/YYYY)                                                                                                   |
| <b>Explanatory variables</b>   |                                                                                                                                                                                                                                                                                                                                                                                                                                                                                                                                                                                                    |                                                                                                                  |
| <b>Variable</b>                | <b>Explanation</b>                                                                                                                                                                                                                                                                                                                                                                                                                                                                                                                                                                                 | <b>Coding</b>                                                                                                    |
| Incidence (rate, year)         | <p>The rate would be recorded as it is in the appraisal. Incidence rate could be found in the final scope document or in manufacturer submission document. If the figures are not identical in each document, the latest rate is recorded.</p> <p>Most appraisals present the annual estimate of the number of patients who are eligible for the treatment in the "Budget Impact" section of company submission. This number is mainly used for the incidence. If this information is not available in the appraisal, the number in previous appraisal for similar indication is used instead.</p> | Number                                                                                                           |
| H2H                            | Whether the head-to-head clinical trial of a technology of interest exists or not, which compares with agreed comparators. The information is most likely to be found in the section: Identification and selection of relevant studies in clinical effectiveness part.                                                                                                                                                                                                                                                                                                                             | no=0, yes=1, yes but some comparators missing =2                                                                 |

|                                              |                                                                                                                                                                                                                                                                                                                                                                                                                                                                                                                                                                                                                                                                                             |                                                                                                                      |
|----------------------------------------------|---------------------------------------------------------------------------------------------------------------------------------------------------------------------------------------------------------------------------------------------------------------------------------------------------------------------------------------------------------------------------------------------------------------------------------------------------------------------------------------------------------------------------------------------------------------------------------------------------------------------------------------------------------------------------------------------|----------------------------------------------------------------------------------------------------------------------|
| • ITC                                        | ITC (indirect treatment comparison). The information could be found in the section: Indirect and mixed treatment comparisons in clinical effectiveness part.                                                                                                                                                                                                                                                                                                                                                                                                                                                                                                                                | no=0, yes=1                                                                                                          |
| • RCT (technology of interest)               | Main RCT used in the appraisal: the name of the H2H RCT, if it exists. Unless there is an H2H, RCT refers to the clinical trial of technology of interest in the ITC.                                                                                                                                                                                                                                                                                                                                                                                                                                                                                                                       | no=0, yes=1                                                                                                          |
| - Name of RCT                                | The name of the aforementioned RCT                                                                                                                                                                                                                                                                                                                                                                                                                                                                                                                                                                                                                                                          | Narrative description                                                                                                |
| - Intervention in RCT                        | The name of the intervention used in the aforementioned RCT. This variable helps to identify the main technology in RCT when technology is appraised as combination therapy.                                                                                                                                                                                                                                                                                                                                                                                                                                                                                                                | Narrative description                                                                                                |
| - Comparators in RCT                         | The comparator of the aforementioned RCT                                                                                                                                                                                                                                                                                                                                                                                                                                                                                                                                                                                                                                                    | Narrative description                                                                                                |
| - Size of RCT                                | The number of participants in the aforementioned RCT                                                                                                                                                                                                                                                                                                                                                                                                                                                                                                                                                                                                                                        | Number                                                                                                               |
| - Median duration of follow-up               | The median duration of follow-up in the aforementioned RCT. If it is not reported, record as NR (not reported).                                                                                                                                                                                                                                                                                                                                                                                                                                                                                                                                                                             | Unit: month<br>Not reported = ..                                                                                     |
| • Anchored/unanchored                        | “Anchored” means that RCT of technology of interest exists, and the RCT has been linked to any other studies which evaluate the drug’s effectiveness.<br>“Unanchored” means that the clinical outcome study doesn’t have any comparators which connect to other studies. For example, comparing a single-arm study with a single-arm study is “unanchored”. Also, RCTs compared without common comparators in ITC is “unanchored”.                                                                                                                                                                                                                                                          | Not anchored=0,<br>Anchored =1                                                                                       |
| • MAIC/STC                                   | Matching adjusted indirect comparison (MAIC), Simulated Treatment Comparison (STC). A methodology of making adjustment to increase the comparability of two distinct populations mostly among unanchored studies. But it could be used in anchored studies in case where the two populations in ITC is starkly different from each other.                                                                                                                                                                                                                                                                                                                                                   | Naive=0,<br>MAIC=1<br>STC=2<br>Other methods=3                                                                       |
| Risk of bias (RoB) of RCT (direct quotation) | In order to evaluate the internal validity of RCTs, the risk of bias, which was reported in the ERG report, will be recorded here. Information is available at the quality assessment part of the ERG report. The ERG assesses the risk of bias of the included study using quality assessment tools. The ERG statement is directly quoted. The ERG often addresses the issue of quality of study narratively. Moreover, the ERG uses different terminology, whereas the domain of assessment is consistent. Therefore, the risk of bias would be narratively recorded. Prior to analysis, it will be scored by looking at the number of factors about which the ERG has expressed concern. | Direct quotation from ERG documents                                                                                  |
| • Risk of bias in RCT (grade)                | In order to conduct statistical analysis, a set of codes will be used here. The direct quotation will be classified into four groups following the number of risk factors.                                                                                                                                                                                                                                                                                                                                                                                                                                                                                                                  | High/good quality without mentioned weakness= 0, risk factor 1 (low) =1, risk factor 2-3 (moderate)=2, risk factor 4 |



|                                                     |                                                                                                                                                                                                                                                                                                                                                                                                                                                                                                                                                                                                            |               |                                                                                                                                 |
|-----------------------------------------------------|------------------------------------------------------------------------------------------------------------------------------------------------------------------------------------------------------------------------------------------------------------------------------------------------------------------------------------------------------------------------------------------------------------------------------------------------------------------------------------------------------------------------------------------------------------------------------------------------------------|---------------|---------------------------------------------------------------------------------------------------------------------------------|
|                                                     |                                                                                                                                                                                                                                                                                                                                                                                                                                                                                                                                                                                                            |               | (high) =3                                                                                                                       |
| External validity of RCT                            | As narrative accounts, generalisability of RCT is reported in the ERG report whether the population of RCT properly represents the UK general population in terms of aging structure, health status and health care practice (practice-dose, subsequent treatment, etc.).                                                                                                                                                                                                                                                                                                                                  |               | Direct quotation from ERG documents                                                                                             |
| • External validity in RCT (grade)                  | In order to conduct statistical analysis, a set of codes will be used here. The direct quotation will be classified into three groups following the severity of generalisability assess by ERG.                                                                                                                                                                                                                                                                                                                                                                                                            |               | Representative without mentioned weakness= 0, Representative but minor concerns =1, Questionable generalisability =2            |
| Previously recommended in other indication          | Whether the technology has been recommended for other types of cancers besides the current indication of the technology.                                                                                                                                                                                                                                                                                                                                                                                                                                                                                   |               | No =0, Yes including all recommend, CDF, Optimised, Optimised (cdf) =1                                                          |
| • TA number & date of appraisal in other indication | If it was recommended for other indications, record the TA number and the date of the FAD documents (MM/YYYY).                                                                                                                                                                                                                                                                                                                                                                                                                                                                                             |               | Narrative description of date                                                                                                   |
| Previous recommended treatment in the same cancer   | Whether the technology has been recommended for other treatment lines in the same type of cancer.                                                                                                                                                                                                                                                                                                                                                                                                                                                                                                          |               | No =0, Yes including all recommend, CDF, Optimised, Optimised (cdf) =1                                                          |
| • TA number & date of appraisal in the same cancer  | If it was recommended for other treatment lines in the same cancer category, record the TA number and the date of the FAD documents (MM/YYYY).                                                                                                                                                                                                                                                                                                                                                                                                                                                             |               | Narrative description of date                                                                                                   |
| Maturity of survival data in clinical trial         | The data maturity is examined by looking at the number of events (deaths) of intervention arm in clinical trials.<br>In published appraisal document, some of the information is redacted due to confidentiality. If the information is not available, the article of clinical trial published in journals is searched in order to check how many events are observed during the trial. Nonetheless, data are still not available in some cases. Since manufacturer is likely to redact the OS information when median OS was not reached. Hence, the survival data in this case are regarded as immature. |               | Direct quote from manufacturer submission                                                                                       |
| • Maturity (grade)                                  | The direct quotation will be classified into three groups following the data cut point, 20% and 50 % of the number of events. This protocol adapts the criterion for measuring maturity of survival data in Tai et al. which investigates data maturity in STAs by looking at the proportion of death in pivotal trials. In the study, 20, 50 and 70 % of proportion of number of deaths are used to discuss the maturity of survival data (1). This protocol only uses 20% and 50% to assess the maturity without the category "unclear."                                                                 |               | Immature (number of events < 20%) =1,<br>Relatively immature (20%≤number of events≤50%)=2<br>Mature (number of events < 50%) =3 |
| <b>Outcome variables</b>                            |                                                                                                                                                                                                                                                                                                                                                                                                                                                                                                                                                                                                            |               |                                                                                                                                 |
| <b>Variable</b>                                     | <b>Explanation</b>                                                                                                                                                                                                                                                                                                                                                                                                                                                                                                                                                                                         | <b>Coding</b> | <b>Example</b>                                                                                                                  |

|                                              |                                                   |                                                                                                                                                                                                                                                                                                                                      |                                                       |                                                                                                                                                                                                                                                                                                                                                                  |
|----------------------------------------------|---------------------------------------------------|--------------------------------------------------------------------------------------------------------------------------------------------------------------------------------------------------------------------------------------------------------------------------------------------------------------------------------------|-------------------------------------------------------|------------------------------------------------------------------------------------------------------------------------------------------------------------------------------------------------------------------------------------------------------------------------------------------------------------------------------------------------------------------|
| 1<br>2<br>3<br>4<br>5<br>6<br>7<br>8<br>9    | characteristic of population                      | Whether RWD are used to determine the characteristic of population, including the initiation age and health performance status (ECOG) or not.<br>- Soft use: when RWD are supplementary evidence to decide the population characteristics<br>- Hard use: when RWD determine the characteristics of population in economic evaluation | No RWD = 0<br>Yes, data from RWD = 1<br>Not clear = 9 | - Pomalidomide, in combination with low-dose dexamethasone, for treating multiple myeloma in adults at third or subsequent relapse (NICE TA427): baseline patient characteristics were obtained from RWD collected from a hospital population since the majority of the trial populations were previously untreated, which was different from target population. |
| 10<br>11<br>12<br>13<br>14<br>15<br>16<br>17 | treatment sequence                                | Whether RWD are used to determine the subsequent treatment option or not.<br>After the disease progression onto the later stages of cancer treatments, patients are likely to receive idiosyncratic subsequent treatments. The pattern of subsequent treatment for cost-effectiveness analysis could be observed by RCT or RWD.      | No RWD = 0<br>Yes, data from RWD = 1<br>Not clear = 9 | - Palbociclib with an aromatase inhibitor for previously untreated, hormone receptor-positive, HER2-negative, locally advanced or metastatic breast cancer (NICE TA495): a study of medical records was used to determine the treatment sequence.                                                                                                                |
| 18<br>19<br>20<br>21<br>22<br>23             | choice of comparator                              | Whether RWD are used to choose the comparators in economic evaluation or not.<br>Although comparators are chosen based on the current clinical guideline, drug utilisation data or clinical expert opinion are frequently referred to find the most relevant comparators in evaluation.                                              | No RWD = 0<br>Yes, data from RWD = 1<br>Not clear = 9 | - Ixazomib with lenalidomide and dexamethasone for treating relapsed or refractory multiple myeloma (NICE TA505): the manufacturer considered that lenalidomide was appropriate comparator based on IMS market research data (lenalidomide, 69% market share and panobinostat, 7%).                                                                              |
| 24<br>25<br>26<br>27<br>28<br>29             | structure (health state)                          | Whether RWD are used to determine the health state such as stable, progression, and death in a given model. Information is available at health state in the model of cost-effectiveness analysis in manufacturer submission documents.                                                                                               | No RWD = 0<br>Yes, data from RWD = 1<br>Not clear = 9 | - Palbociclib with an aromatase inhibitor for previously untreated, hormone receptor-positive, HER2-negative, locally advanced or metastatic breast cancer (NICE TA495): the model health state of post-progression was specified based on a retrospective patient medical record review study.                                                                  |
| 30<br>31<br>32<br>33                         | structure (model cycle)                           | Whether RWD are used to determine model cycle or not. Model cycle, hereby, means that the duration between different health states, which can be influenced by the severity of conditions.                                                                                                                                           | No RWD = 0<br>Yes, data from RWD = 1<br>Not clear = 9 | N/A **                                                                                                                                                                                                                                                                                                                                                           |
| 34<br>35<br>36<br>37<br>38<br>39<br>40       | Structure (survival distribution of intervention) | Whether RWD are used to decide the survival distribution of intervention or not.<br>Since survival rate observed in RCTs is immature, it is necessary to extrapolate the survival rate for analysis. In order to choose proper survival distribution, the goodness of fit is tested (AIC, BIC).                                      | No RWD = 0<br>Yes, data from RWD = 1<br>Not clear = 9 | - Larotrectinib for treating advanced solid tumours with NTRK fusions (NICE TA630): UK all-cause mortality data were used to assess the clinical acceptability of distributions whether patient overall survival exceeded current UK life expectancy                                                                                                             |

1  
2  
3  
4  
5  
6  
7  
8  
9  
10  
11  
12  
13  
14  
15  
16  
17  
18  
19  
20  
21  
22  
23  
24  
25  
26  
27  
28  
29  
30  
31  
32  
33  
34  
35  
36  
37  
38  
39  
40  
41  
42  
43  
44  
45  
46

1  
2  
3  
4  
5  
6  
7  
8  
9  
10  
11  
12  
13  
14  
15  
16  
17  
18  
19  
20  
21  
22  
23  
24  
25  
26  
27  
28  
29  
30  
31  
32  
33  
34  
35  
36  
37  
38  
39  
40  
41  
42  
43  
44  
45  
46

|                                                     |                                                                                                                                                                                                                                                                                                                                                                                                                                                                                                                                                                                                                                                                                 |                                                                |                                                                                                                                                                                                                                                                 |
|-----------------------------------------------------|---------------------------------------------------------------------------------------------------------------------------------------------------------------------------------------------------------------------------------------------------------------------------------------------------------------------------------------------------------------------------------------------------------------------------------------------------------------------------------------------------------------------------------------------------------------------------------------------------------------------------------------------------------------------------------|----------------------------------------------------------------|-----------------------------------------------------------------------------------------------------------------------------------------------------------------------------------------------------------------------------------------------------------------|
|                                                     | <p>Also, the clinical plausibility is asked to validate the distribution. In this case, the alternative data can be utilized.</p> <ul style="list-style-type: none"> <li>- If RWD is utilised for choosing distribution, mark as "hard use".</li> <li>- If RWD is utilised as supplementary evidence for the chosen distribution, mark as "soft use".</li> </ul>                                                                                                                                                                                                                                                                                                                |                                                                |                                                                                                                                                                                                                                                                 |
| Structure (survival distribution of comparator)     | <p>Whether RWD are used to validate the feasibility of survival distribution of comparator or not.</p> <p>As survival distributions of intervention and comparators are separately determined, the extraction tool approach it independently. Apply the abovementioned description on survival distribution of intervention to comparator in this row.</p>                                                                                                                                                                                                                                                                                                                      | <p>No RWD = 0<br/>Yes, data from RWD = 1<br/>Not clear = 9</p> |                                                                                                                                                                                                                                                                 |
| Structure (Time to discontinuation of intervention) | <p>Whether RWD are used to decide the time to discontinuation of intervention or not.</p> <p>The time to discontinuation is likely to be decided by 1) simply adopting discontinuation rule in trials, 2) formulating distribution of discontinuation, or 3) clinical experts' opinion.</p> <ul style="list-style-type: none"> <li>- If RWD are used for designating the time to discontinuation, mark as "hard use"</li> <li>- If RWD are used as supplementary evidence for designating the time to discontinuation, mark as "soft use".</li> <li>- If clinical experts' opinions are used for designating the time to discontinuation, it is not regarded as RWD.</li> </ul> | <p>No RWD = 0<br/>Yes, data from RWD = 1<br/>Not clear = 9</p> | <ul style="list-style-type: none"> <li>- Lorlatinib for previously treated ALK-positive advanced non-small-cell lung cancer (NICE TA628): The plausibility of the extrapolation of time on treatment was validated by UK RWD, hospital network data.</li> </ul> |
| Structure (time to discontinuation of comparator)   | <p>Whether RWD are used to decide the time to discontinuation of comparator or not.</p> <p>Apply the above-mentioned description on time to discontinuation of intervention to comparator in this</p>                                                                                                                                                                                                                                                                                                                                                                                                                                                                           | <p>No RWD = 0<br/>Yes, data from RWD = 1<br/>Not clear = 9</p> |                                                                                                                                                                                                                                                                 |

|                                     | row.                                                                                                                                                                                                                                                                                                                                                              |                                                       |                                                                                                                                                                                                                                                                                        |
|-------------------------------------|-------------------------------------------------------------------------------------------------------------------------------------------------------------------------------------------------------------------------------------------------------------------------------------------------------------------------------------------------------------------|-------------------------------------------------------|----------------------------------------------------------------------------------------------------------------------------------------------------------------------------------------------------------------------------------------------------------------------------------------|
| Clinical outcome (OS) intervention  | Whether RWD give the figure for overall survival (OS) of intervention or not. In order to measure the Quality Adjusted Life-Years (QALYs), it is necessary to extrapolate overall survival based on observed data on survival. The survival data could come from RCT or RWD.                                                                                      | No RWD = 0<br>Yes, data from RWD = 1<br>Not clear = 9 | - Nivolumab for adjuvant treatment of completely resected melanoma with lymph node involvement or metastatic disease (NICE TA558): the survival model applied the registry data (American Joint Committee on Cancer; AJCC) to both treatment arms after a certain time point.          |
| Clinical outcome (PFS) intervention | Whether RWD give the figure for progression free survival (PFS) of intervention or not. The progression of disease is important for economic evaluation model in terms of health state transitions and treatment switching. The survival data could come from RCT or RWD.                                                                                         | No RWD = 0<br>Yes, data from RWD = 1<br>Not clear = 9 | N/A**                                                                                                                                                                                                                                                                                  |
| Clinical outcome (RR) intervention  | Whether RWD provides the response rate (RR) for the intervention or not. The effectiveness of cancer treatment is often shown by responses of tumour cells, which is evaluated by the RECIST criteria or other criteria. The response rate data would be collected in RCT or other type of data.                                                                  | No RWD = 0<br>Yes, data from RWD = 1<br>Not clear = 9 | N/A**                                                                                                                                                                                                                                                                                  |
| Clinical outcome (TTP) intervention | Whether RWD give the figure for time-to-progression (TTP) of intervention or not. Some cancer treatments show their clinical effectiveness not through the progression free survival (PFS), but alternatively through time-to-progression.                                                                                                                        | No RWD = 0<br>Yes, data from RWD = 1<br>Not clear = 9 | N/A**                                                                                                                                                                                                                                                                                  |
| Clinical outcome (AE) intervention  | Whether RWD give the figure of adverse event (AE) of intervention or not. Adverse events are crucial information for the estimation of the QALYs. The adverse events are collected in RCT. However, RWD, including cohort studies, retrospective studies, or other type of studies, also provide the information of adverse events, which cannot be found in RCT. | No RWD = 0<br>Yes, data from RWD = 1<br>Not clear = 9 | - Blinatumomab for treating acute lymphoblastic leukaemia in remission with minimal residual disease activity (NICE TA589): retrospective non-interventional cohort study collected from 2000 to 2017 was used to inform the clinical outcome of comparators as well as adverse event. |
| Clinical outcome (OS) comparators   | Whether RWD give the figure of overall survival (OS) of comparators or not.                                                                                                                                                                                                                                                                                       | No RWD = 0<br>Yes, data from RWD = 1<br>Not clear = 9 | Refer to the variable, clinical outcome (OS) intervention                                                                                                                                                                                                                              |

|                                                     |                                                                                                                                                                                                                                                                                                                                                        |                                                       |                                                                                                                                                                                                                                                                                                                                                 |
|-----------------------------------------------------|--------------------------------------------------------------------------------------------------------------------------------------------------------------------------------------------------------------------------------------------------------------------------------------------------------------------------------------------------------|-------------------------------------------------------|-------------------------------------------------------------------------------------------------------------------------------------------------------------------------------------------------------------------------------------------------------------------------------------------------------------------------------------------------|
| Clinical outcome comparators (PFS)                  | Whether RWD give the figure for the progression free survival (PFS) of comparators or not.                                                                                                                                                                                                                                                             | No RWD = 0<br>Yes, data from RWD = 1<br>Not clear = 9 | N/A**                                                                                                                                                                                                                                                                                                                                           |
| Clinical outcome comparators (RR)                   | Whether RWD provide the response rate (RR) of comparators or not.                                                                                                                                                                                                                                                                                      | No RWD = 0<br>Yes, data from RWD = 1<br>Not clear = 9 | N/A**                                                                                                                                                                                                                                                                                                                                           |
| Clinical outcome comparators (TTP)                  | Whether RWD provide the time-to-progression (TTP) of comparators or not.                                                                                                                                                                                                                                                                               | No RWD = 0<br>Yes, data from RWD = 1<br>Not clear = 9 | N/A**                                                                                                                                                                                                                                                                                                                                           |
| Clinical outcome comparators (AE)                   | Whether RWD provide the figure adverse events (AE) for the comparators or not.                                                                                                                                                                                                                                                                         | No RWD = 0<br>Yes, data from RWD = 1<br>Not clear = 9 | Refer to the variable, clinical outcome (AE) intervention                                                                                                                                                                                                                                                                                       |
| Transition probability                              | Whether RWD provide the transition probability from one state to other state, if it is applicable.                                                                                                                                                                                                                                                     | No RWD = 0<br>Yes, data from RWD = 1<br>Not clear = 9 | - Pembrolizumab for treating melanoma with high risk of recurrence (NICE TA553): electronic health records (Flatiron database) collected by cancer care providers in the US was used to model transition from the "locoregional recurrence (LR)" state to the "distant metastases" and life tables for transition from the LR to "death" state. |
| Health utility of health state (generic)            | Whether health state utility survey of generic measurement is done in RWD or RCT. Health state utility is necessary information for the estimation of the QALYs. Generic health utility measurement, EQ-5D, is frequently used. There is national tariff of EQ-5D to get the scores. Hereby, the way of collecting survey (RWD or RCT) is highlighted. | No RWD = 0<br>Yes, data from RWD = 1<br>Not clear = 9 | N/A**                                                                                                                                                                                                                                                                                                                                           |
| Health utility of health state (condition-specific) | Whether health state utility survey of condition-specific measurement is done in RWD or RCT. In cancer treatment, condition-specific measurement is commonly adopted. Similar to the previous row, the way of collecting survey (RWD or RCT) is highlighted.                                                                                           | No RWD = 0<br>Yes, data from RWD = 1<br>Not clear = 9 | N/A**                                                                                                                                                                                                                                                                                                                                           |

|                                                                                |                                                 |                                                                                                                                                                                                                                                                                                                                                                                                                                                                                                                                                                                                                                                        |                                                       |                                                                                                                                                                                                                                                                                                                                                                                                          |
|--------------------------------------------------------------------------------|-------------------------------------------------|--------------------------------------------------------------------------------------------------------------------------------------------------------------------------------------------------------------------------------------------------------------------------------------------------------------------------------------------------------------------------------------------------------------------------------------------------------------------------------------------------------------------------------------------------------------------------------------------------------------------------------------------------------|-------------------------------------------------------|----------------------------------------------------------------------------------------------------------------------------------------------------------------------------------------------------------------------------------------------------------------------------------------------------------------------------------------------------------------------------------------------------------|
| 1<br>2<br>3<br>4<br>5<br>6<br>7                                                | Disutility of adverse events                    | Whether survey of collecting disutility data is done in RWD or RCT. As adverse events are likely to reduce the patient's quality of life, the disutility of adverse events is included in estimates. The way of collecting survey (RWD or RCT) is drawn to attention.                                                                                                                                                                                                                                                                                                                                                                                  | No RWD = 0<br>Yes, data from RWD = 1<br>Not clear = 9 | N/A**                                                                                                                                                                                                                                                                                                                                                                                                    |
| 8<br>9<br>10<br>11<br>12<br>13<br>14<br>15<br>16<br>17<br>18<br>19<br>20<br>21 | Resource use (Health state cost) common         | Whether resource use for estimating health state cost is derived from RWD or RCT. In economic evaluation, the unit cost mostly comes from the national reference cost. The total cost is calculated by the total resource use (volume of technology and health care services) multiplied by the reference cost. Here, the only resource use is focused in data extraction. Resource use for estimating health state cost includes all activity like monitoring, GP visits, pharmacy cost etc. Health state resource use could be aggregated or individually listed. Here, the difference of describing health state cost is not separately considered. | No RWD = 0<br>Yes, data from RWD = 1<br>Not clear = 9 | - Axicabtagene ciloleucel for treating diffuse large B-cell lymphoma and primary mediastinal large B-cell lymphoma after 2 or more systemic therapies (NICE TA559): RWD was used for estimating the cost of inpatient admission (data: Hospital Episode Statistics), the cost of home care and hospice (data: National Audit Office), and GP time (data: Personal Social Services Research Unit; PSSRU). |
| 22<br>23<br>24<br>25<br>26<br>27<br>28                                         | Resource use (end-of-life care) common          | Whether resource use for estimating end-of-life care is derived from RWD or RCT. Resource use of terminal cancer patients is not frequently reported in the RCT providing the treatment effect. Therefore, other data resources, including RCTs of other technologies, provide the information of resource use in the end-of-life care.                                                                                                                                                                                                                                                                                                                | No RWD = 0<br>Yes, data from RWD = 1<br>Not clear = 9 | N/A**                                                                                                                                                                                                                                                                                                                                                                                                    |
| 29<br>30<br>31<br>32<br>33                                                     | Resource use (Managing AE) intervention         | Whether resource use for managing adverse events of intervention is derived from RWD or RCT. Resource use of managing adverse events is reported in RCTs as well as in other types of researches which can provide alternative perspectives.                                                                                                                                                                                                                                                                                                                                                                                                           | No RWD = 0<br>Yes, data from RWD = 1<br>Not clear = 9 | N/A**                                                                                                                                                                                                                                                                                                                                                                                                    |
| 34<br>35<br>36<br>37<br>38<br>39<br>40                                         | Resource use (volume of treatment) intervention | Whether resource use for volume of treatment of intervention is derived from RWD or RCT. In this study, scope of the volume of treatment is limited to the frequency of treatment, frequency of administration, and amount of subsequent treatment.                                                                                                                                                                                                                                                                                                                                                                                                    | No RWD = 0<br>Yes, data from RWD = 1<br>Not clear = 9 | - Fulvestrant for treating untreated locally advanced or metastatic oestrogen-receptor positive breast cancer (NICE TA503): a medical chart review study was used to determine the proportion of patient using subsequent treatment for cost calculation.                                                                                                                                                |

1  
2  
3  
4  
5  
6  
7  
8  
9  
10  
11  
12  
13  
14  
15  
16  
17  
18  
19  
20  
21  
22  
23  
24  
25  
26  
27  
28  
29  
30  
31  
32  
33  
34  
35  
36  
37  
38  
39  
40  
41  
42  
43  
44  
45  
46

|                                                                                                                                                                                                                                                                                                                                                                                                                                                                                                                                                                                                                                                                                                                                                                             |                                                                                                                                                                                                                                                                                                                                                                            |                                                       |                                                                        |
|-----------------------------------------------------------------------------------------------------------------------------------------------------------------------------------------------------------------------------------------------------------------------------------------------------------------------------------------------------------------------------------------------------------------------------------------------------------------------------------------------------------------------------------------------------------------------------------------------------------------------------------------------------------------------------------------------------------------------------------------------------------------------------|----------------------------------------------------------------------------------------------------------------------------------------------------------------------------------------------------------------------------------------------------------------------------------------------------------------------------------------------------------------------------|-------------------------------------------------------|------------------------------------------------------------------------|
| Resource use (Dose adjustment) intervention                                                                                                                                                                                                                                                                                                                                                                                                                                                                                                                                                                                                                                                                                                                                 | Whether resource use for dose adjustment of intervention is derived from RWD or RCT. There are several reasons for adjusting dose such as adverse events (AEs). The dose of cancer treatments is calculated by BSA (body surface area). This study focuses only on BSA and dose adjustment due to AEs, because these information are commonly reported in NICE appraisals. | No RWD = 0<br>Yes, data from RWD = 1<br>Not clear = 9 | N/A**                                                                  |
| Resource use (Managing AE) comparators                                                                                                                                                                                                                                                                                                                                                                                                                                                                                                                                                                                                                                                                                                                                      | Whether resource use for managing adverse events of comparators is derived from RWD or RCT.                                                                                                                                                                                                                                                                                | No RWD = 0<br>Yes, data from RWD = 1<br>Not clear = 9 | N/A**                                                                  |
| Resource use (volume of treatment) comparators                                                                                                                                                                                                                                                                                                                                                                                                                                                                                                                                                                                                                                                                                                                              | Whether resource use for volume of treatment of comparators is derived from RWD or RCT.                                                                                                                                                                                                                                                                                    | No RWD = 0<br>Yes, data from RWD = 1<br>Not clear = 9 | Refer to the variable, resource use (volume of treatment) intervention |
| Resource use (Dose adjustment) comparators                                                                                                                                                                                                                                                                                                                                                                                                                                                                                                                                                                                                                                                                                                                                  | Whether resource use for dose adjustment of comparators is derived from RWD or RCT. Since the intervention is a novel technology, RCTs provide less information on the adjustment. RWD could be utilised to provide more relevant information regarding dose adjustment of existing technologies which have been used in routine clinical practice.                        | No RWD = 0<br>Yes, data from RWD = 1<br>Not clear = 9 | N/A**                                                                  |
| <p>* In order to detect the use of RWD in sensitivity analysis, the parametric part is duplicated.</p> <p>** As data extraction is not conducted, all of examples are not available at this stage. In this case, it marked as N/A.</p> <p>*** Benefits/challenges of the use of RWD are collected in outcome variables.</p> <p>**** In cases where trials have more than two arms, only the arms considered as relevant for decision problem in evidence submission are included. If there are two intervention arms and these arms are separately used for different indications in appraisals, the data extraction is carried out separately. When two arms are relevant as comparators for same indication, the data are recorded without distinguishing these arms.</p> |                                                                                                                                                                                                                                                                                                                                                                            |                                                       |                                                                        |

- Tai TA, Latimer NR, Benedict A, Kiss Z, Nikolaou A. Prevalence of Immature Survival Data for Anti-Cancer Drugs Presented to the National Institute for Health and Care Excellence and Impact on Decision Making. Value Heal. 2020 Dec 8;

1  
2  
3  
4  
5  
6  
7  
8  
9  
10  
11  
12  
13  
14  
15  
16  
17  
18  
19  
20  
21  
22  
23  
24  
25  
26  
27  
28  
29  
30  
31  
32  
33  
34  
35  
36  
37  
38  
39  
40  
41  
42  
43  
44  
45  
46

For peer review only
